# Supplementary material for: Visible-light-promoted hydroxysulfonylation of alkylidenecyclopropanes: synthesis of cyclopropane-containing β-hydroxysulfones
Source: Royal Society of Chemistry journal article supplement (doi:10.1039/c9qo01058k), 2019-01-01

## Supporting Information

### Visible-Light-Promoted Hydroxysulfonylation of Alkylidenecyclopropanes: Synthesis of Cyclopropane-Containing $\beta$ -Hydroxysulfones

Chuang Liu, Yan-Jie Yang, Jun-Ying Dong, Ming-Dong Zhou, Lei Li\* and He  
Wang\*

School of Chemistry and Materials Science, Liaoning Shihua University, Fushun  
113001, P. R. China. Fax: (+86)-24-56863837; phone: (+86)-24-56863837; e-mail:  
heliwang123@126.com, lilei0814.com@163.com.

#### Table of Contents

|                                                         |     |
|---------------------------------------------------------|-----|
| I. General Information Data.....                        | S1  |
| II. Experimental Section and Characterization Data..... | S1  |
| III. Derivatization of product <b>3aa</b> .....         | S21 |
| IV. Control experiments.....                            | S22 |
| V. Crystal structure of <b>3aa</b> .....                | S23 |
| VI. NMR Spectra.....                                    | S33 |

## I. General Information

All chemicals were obtained from commercial sources and were used as received unless otherwise noted.  $^1\text{H}$ ,  $^{13}\text{C}$  and  $^{19}\text{F}$  NMR spectra were recorded using  $\text{CDCl}_3$  or DMSO as a solvent on a 400 MHz spectrometer at 298 K. The chemical shift is given in dimensionless  $\delta$  values and is frequency referenced relative to TMS in  $^1\text{H}$  and  $^{13}\text{C}$  NMR spectroscopy. HRMS data were obtained via ESI mode with a TOF mass analyzer. The intensity data were recorded on a Bruker D8 QUEST with Mo-K $\alpha$  radiation ( $\lambda = 0.71073 \text{ \AA}$ ). The crystal structure was solved by means of direct methods and refined by employing full-matrix least squares on F2 (SHELXTL-2014). All solvents were obtained from commercial sources and were used as received. Column chromatography was performed on silica gel (300-400 mesh) using ethyl acetate (EA)/petroleum ether (PE).

## II. Experimental Section and Characterization Data

ACPs 1 was synthesized according to the literatures.<sup>1-11</sup>

Method 1: KO<sup>t</sup>Bu (2.53 g, 22.5 mmol) was added at room temperature in three portions (7.5 mmol each) to a stirred suspension of 3-bromopropyltriphenylphosphonium bromide (4.64 g, 10 mmol) in dry THF (45 mL). After the solution was stirred at room temperature for 30 min. The orange solution was then refluxed for 2 h before aryl ketones (10 mmol) was added and stirring was continued at 65 °C for overnight. The reaction mixture was quenched by brine (20 mL) at room temperature, the aqueous layer was extracted with hexane (3 × 10 mL). The combined organic layers were washed with brine (4 × 10 mL), dried over anhydrous  $\text{MgSO}_4$ , filtered and concentrated under reduced pressure. The crude reaction mixture was purified by flash column chromatography over silica gel with PE / EA to afford the corresponding product **1**.

Method 2: To a suspension of 0.85 g of NaH (53% suspension in mineral oil) in 20 ml 1,2-dimethoxyethane, 3-bromopropyltriphenylphosphonium bromide (4.64 g, 10 mmol) was added at room temp under  $\text{N}_2$ , and then two drops of EtOH were added. This mixture was stirred for 6 h at 60-70 °C. Aryl ketones (10 mmol) was added and

the mixture was stirred at 70 °C for an additional 5 h. The mixture was poured into ice-water and extracted with hexane. The hexane extract was dried and concentrated. The crude reaction mixture was purified by flash column chromatography over silica gel with PE / EA to afford the corresponding product **1**.

### Synthesis of $\beta$ -Hydroxysulfones **3**

ACPs (**1**, 0.2 mmol), TsCl (**2a**, 0.3 mmol), [Ru(bpy)<sub>3</sub>]Cl<sub>2</sub>•6H<sub>2</sub>O (2 mol %), and K<sub>2</sub>HPO<sub>4</sub> (1.5 equiv) was added in CH<sub>3</sub>CN:H<sub>2</sub>O=30:1 (1 mL) at room temperature and 12 W blue LED light irradiation for 3 h under N<sub>2</sub> atmosphere. After the reaction, CH<sub>3</sub>CN was removed under reduced pressure, purification was finally performed by flash column chromatography on silica gel using EtOAc and petroleum ether to give the desired product **3**.

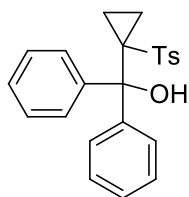

#### Diphenyl(1-tosylcyclopropyl)methanol (**3aa**)

White solid; m.p. 181-182 °C; yield: 68.2 mg (90%); <sup>1</sup>H NMR (400 MHz, CDCl<sub>3</sub>)  $\delta$  7.39-7.36 (m, 4H), 7.22 (d, *J* = 8.4 Hz, 2H), 7.14-7.05 (m, 6H), 7.00 (d, *J* = 8.0 Hz, 2H), 5.78 (s, 1H), 2.37 (s, 3H), 1.71-1.67 (m, 2H), 1.05-0.91 (m, 2H). <sup>13</sup>C NMR (100 MHz, CDCl<sub>3</sub>)  $\delta$  143.8, 142.4, 137.5, 129.2, 128.6, 127.7, 127.5, 127.2, 79.0, 49.1, 21.5, 10.5. HRMS (ESI): calcd for C<sub>23</sub>H<sub>22</sub>O<sub>3</sub>S ([M+Na]<sup>+</sup>) 401.1182, found 401.1191.

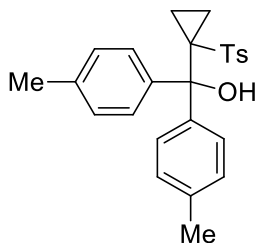

#### Di-*p*-tolyl(1-tosylcyclopropyl)methanol (**3ba**)

White solid; m.p. 225-226 °C; yield: 56.2 mg (69%); <sup>1</sup>H NMR (400 MHz, CDCl<sub>3</sub>)  $\delta$  7.25-7.19 (m, 4H), 7.20 (d, *J* = 8.4 Hz, 2H), 7.00 (d, *J* = 8.4 Hz, 2H), 6.86 (d, *J* = 8.0 Hz, 4H), 5.67 (s, 1H), 2.39 (s, 3H), 2.24 (s, 6H), 1.68-1.65 (m, 2H), 1.05-1.01 (m, 2H).

$^{13}\text{C}$  NMR (100 MHz,  $\text{CDCl}_3$ )  $\delta$  143.6, 139.5, 137.7, 136.9, 129.1, 128.6, 128.1, 127.5, 78.7, 49.4, 21.6, 20.9, 10.4. HRMS (ESI): calcd for  $\text{C}_{25}\text{H}_{26}\text{O}_3\text{S}$  ( $[\text{M}+\text{Na}]^+$ ) 429.1495, found 429.1496.

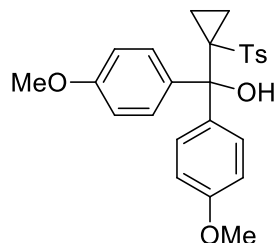

Bis(4-methoxyphenyl)(1-tosylcyclopropyl)methanol (**3ca**)

White solid; m.p. 173-174 °C; yield: 57.7 mg (66%);  $^1\text{H}$  NMR (400 MHz,  $\text{CDCl}_3$ )  $\delta$  7.28-7.26 (m, 4H), 7.21 (d,  $J = 8.4$  Hz, 2H), 7.02 (d,  $J = 8.0$  Hz, 2H), 6.58 (d,  $J = 9.2$  Hz, 4H), 5.68 (s, 1H), 3.73 (s, 6H), 2.38 (s, 3H), 1.69-1.66 (m, 2H), 1.03-1.00 (m, 2H).  $^{13}\text{C}$  NMR (100 MHz,  $\text{CDCl}_3$ )  $\delta$  158.7, 143.6, 137.7, 134.7, 129.1, 128.8, 128.6, 112.7, 78.5, 55.2, 49.6, 21.5, 10.4. HRMS (ESI): calcd for  $\text{C}_{25}\text{H}_{26}\text{O}_5\text{S}$  ( $[\text{M}+\text{Na}]^+$ ) 461.1393, found 461.1399.

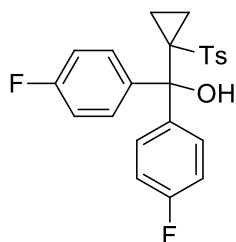

Bis(4-fluorophenyl)(1-tosylcyclopropyl)methanol (**3da**)

White solid; m.p. 200-201 °C; yield: 44.1 mg (53%);  $^1\text{H}$  NMR (400 MHz,  $\text{CDCl}_3$ )  $\delta$  7.35-7.29 (m, 4H), 7.23 (d,  $J = 8.4$  Hz, 2H), 7.07 (d,  $J = 8.4$  Hz, 2H), 6.78-6.74 (m, 4H), 5.86 (s, 1H), 2.41 (s, 3H), 1.73-1.70 (m, 2H), 0.99-0.96 (m, 2H).  $^{13}\text{C}$  NMR (100 MHz,  $\text{CDCl}_3$ )  $\delta$  162.0 (d,  $J = 245.9$  Hz), 144.3, 138.0 (d,  $J = 3.2$  Hz), 137.3, 129.4, 129.3, 128.6, 114.4 (d,  $J = 21.2$  Hz), 78.4, 49.1, 21.5, 10.4. HRMS (ESI): calcd for  $\text{C}_{23}\text{H}_{20}\text{F}_2\text{O}_3\text{S}$  ( $[\text{M}+\text{Na}]^+$ ) 437.0993, found 437.0997.

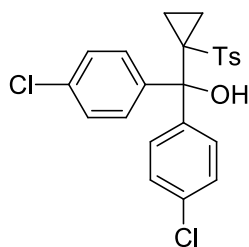

Bis(4-chlorophenyl)(1-tosylcyclopropyl)methanol (**3ea**)

White solid; m.p. 260-261 °C; yield: 55.0 mg (62%); <sup>1</sup>H NMR (400 MHz, CDCl<sub>3</sub>) δ 7.28 (d, *J* = 8.8 Hz, 4H), 7.21 (d, *J* = 8.4 Hz, 2H), 7.08-7.02 (m, 6H), 5.89 (s, 1H), 2.45 (s, 3H), 1.75-1.71 (m, 2H), 0.99-0.96 (m, 2H). <sup>13</sup>C NMR (100 MHz, CDCl<sub>3</sub>) δ 144.6, 140.4, 137.1, 133.7, 129.4, 128.9, 128.5, 127.7, 78.3, 48.9, 21.6, 10.2. HRMS (ESI): calcd for C<sub>23</sub>H<sub>20</sub>Cl<sub>2</sub>O<sub>3</sub>S ([M+Na]<sup>+</sup>) 469.0402, found 469.0413.

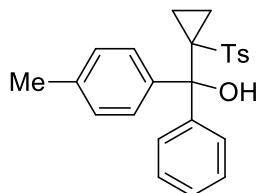

Phenyl(*p*-tolyl)(1-tosylcyclopropyl)methanol (**3fa**)

White solid; m.p. 182-183 °C; yield: 53.0 mg (68%); <sup>1</sup>H NMR (400 MHz, CDCl<sub>3</sub>) δ 7.40-7.36 (m, 2H), 7.26-7.23 (m, 2H), 7.21 (d, *J* = 8.4 Hz, 2H), 7.13-7.04 (m, 3H), 7.00 (d, *J* = 8.0 Hz, 2H), 6.86 (d, *J* = 8.0 Hz, 2H), 5.72 (s, 1H), 2.38 (s, 3H), 2.34 (s, 3H), 1.70-1.66 (m, 2H), 1.05-1.01 (m, 2H). <sup>13</sup>C NMR (100 MHz, CDCl<sub>3</sub>) δ 143.7, 142.5, 139.4, 137.6, 137.0, 129.2, 128.6, 128.2, 127.6, 127.6, 127.5, 127.2, 78.9, 49.3, 21.6, 20.9, 10.5, 10.4. HRMS (ESI): calcd for C<sub>24</sub>H<sub>24</sub>O<sub>3</sub>S ([M+Na]<sup>+</sup>) 415.1338, found 415.1344.

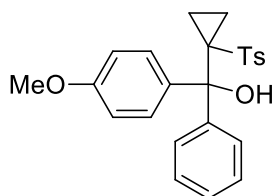

(4-Methoxyphenyl)(phenyl)(1-tosylcyclopropyl)methanol (**3ga**)

White solid; m.p. 138-139 °C; yield: 46.8 mg (57%); <sup>1</sup>H NMR (400 MHz, CDCl<sub>3</sub>) δ 7.37-7.35 (m, 2H), 7.27 (d, *J* = 8.8 Hz, 2H), 7.21 (d, *J* = 8.4 Hz, 2H), 7.11-7.06 (m, 3H), 7.01 (d, *J* = 8.0 Hz, 2H), 6.59 (d, *J* = 9.2 Hz, 2H), 5.73 (s, 1H), 3.72 (s, 3H), 2.37 (s, 3H), 1.70-1.66 (m, 2H), 1.04-1.00 (m, 2H). <sup>13</sup>C NMR (100 MHz, CDCl<sub>3</sub>) δ 158.8, 143.7, 142.7, 137.6, 134.5, 129.2, 128.9, 128.6, 127.6, 127.5, 127.2, 112.8, 78.8, 55.2, 49.3, 21.5, 10.5, 10.3. HRMS (ESI): calcd for C<sub>24</sub>H<sub>24</sub>O<sub>4</sub>S ([M+Na]<sup>+</sup>) 431.1288, found 431.1295.

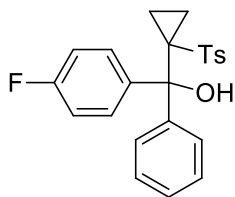

(4-Fluorophenyl)(phenyl)(1-tosylcyclopropyl)methanol (**3ha**)

White solid; m.p. 195-196 °C; yield: 56.0 mg (71%); <sup>1</sup>H NMR (400 MHz, CDCl<sub>3</sub>) δ 7.36-7.32 (m, 4H), 7.23 (d, *J* = 8.4 Hz, 2H), 7.15-7.07 (m, 3H), 7.03 (d, *J* = 8.0 Hz, 2H), 6.76-6.71 (m, 2H), 5.83 (s, 1H), 2.39 (s, 3H), 1.71-1.68 (m, 2H), 1.04-0.97 (m, 2H). <sup>13</sup>C NMR (100 MHz, CDCl<sub>3</sub>) δ 162.0 (d, *J* = 245.6 Hz), 144.1, 142.0, 138.4 (d, *J* = 3.2 Hz), 137.4, 129.4, 129.3, 129.2, 128.6, 127.6, 127.4, 114.2 (d, *J* = 21.3 Hz), 78.7, 49.1, 21.5, 10.7, 10.2. HRMS (ESI): calcd for C<sub>23</sub>H<sub>21</sub>FO<sub>3</sub>S ([M+H]<sup>+</sup>) 397.1268, found 397.1268.

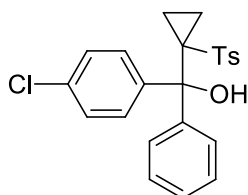

(4-Chlorophenyl)(phenyl)(1-tosylcyclopropyl)methanol (**3ia**)

White solid; m.p. 187-188 °C; yield: 50.9 mg (62%); <sup>1</sup>H NMR (400 MHz, CDCl<sub>3</sub>) δ 7.37-7.35 (m, 2H), 7.29 (d, *J* = 8.8 Hz, 2H), 7.21 (d, *J* = 8.0 Hz, 2H), 7.16-7.08 (m, 3H), 7.03 (d, *J* = 8.0 Hz, 2H), 6.98 (d, *J* = 8.8 Hz, 2H), 5.85 (s, 1H), 2.41 (s, 3H), 1.75-1.67 (m, 2H), 1.05-0.95 (m, 2H). <sup>13</sup>C NMR (100 MHz, CDCl<sub>3</sub>) δ 144.3, 141.6, 141.2, 137.3, 133.4, 129.3, 128.9, 128.6, 127.7, 127.6, 127.6, 127.5, 78.6, 49.0, 21.6, 11.0, 9.7. HRMS (ESI): calcd for C<sub>23</sub>H<sub>21</sub>ClO<sub>3</sub>S ([M+Na]<sup>+</sup>) 435.0792, found 435.0799.

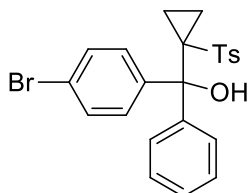

(4-Bromophenyl)(phenyl)(1-tosylcyclopropyl)methanol (**3ja**)

White solid; m.p. 188-189 °C; yield: 66.5 mg (73%); <sup>1</sup>H NMR (400 MHz, CDCl<sub>3</sub>) δ 7.38-7.35 (m, 2H), 7.23-7.20 (m, 4H), 7.15-7.09 (m, 5H), 7.04 (d, *J* = 8.0 Hz, 2H), 5.85 (s, 1H), 2.42 (s, 3H), 1.76-1.66 (m, 2H), 1.06-0.95 (m, 2H). <sup>13</sup>C NMR (100 MHz, CDCl<sub>3</sub>) δ 144.3, 141.8, 141.4, 137.3, 130.5, 129.4, 129.3, 128.5, 127.7, 127.6, 127.5,

121.7, 78.6, 48.97, 21.6, 11.1, 8.5. HRMS (ESI): calcd for C<sub>23</sub>H<sub>21</sub>BrO<sub>3</sub>S ([M+H]<sup>+</sup>) 457.0468, found 457.0461.

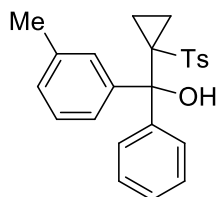

Phenyl(*m*-tolyl)(1-tosylcyclopropyl)methanol (**3ka**)

White solid; m.p. 153-154 °C; yield: 51.2 mg (65%); <sup>1</sup>H NMR (400 MHz, CDCl<sub>3</sub>) δ 7.40-7.38 (m, 2H), 7.21 (d, *J* = 8.4 Hz, 2H), 7.18-7.16 (m, 2H), 7.12-7.06 (m, 3H), 7.01-6.95 (m, 3H), 6.91 (d, *J* = 7.6 Hz, 1H), 5.79 (s, 1H), 2.37 (s, 3H), 2.14 (s, 3H), 1.74-1.64 (m, 2H), 1.08-1.00 (m, 2H). <sup>13</sup>C NMR (100 MHz, CDCl<sub>3</sub>) δ 143.8, 142.4, 142.2, 137.5, 137.0, 129.2, 128.6, 128.4, 128.0, 127.7, 127.5, 127.4, 127.3, 124.9, 78.9, 49.2, 21.5, 10.9, 10.2. HRMS (ESI): calcd for C<sub>24</sub>H<sub>24</sub>O<sub>3</sub>S ([M+Na]<sup>+</sup>) 415.1338, found 415.1321.

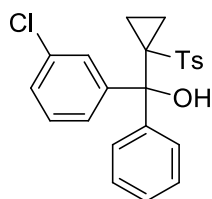

(3-Chlorophenyl)(phenyl)(1-tosylcyclopropyl)methanol (**3la**)

White solid; m.p. 167-168 °C; yield: 56.2 mg (68%); <sup>1</sup>H NMR (400 MHz, CDCl<sub>3</sub>) δ 7.37-7.35 (m, 2H), 7.32 (d, *J* = 7.6 Hz, 1H), 7.26-7.22 (m, 3H), 7.14-7.12 (m, 3H), 7.09-7.00 (m, 4H), 5.92 (s, 1H), 2.39 (s, 3H), 1.78-1.66 (m, 2H), 1.09-0.95 (m, 2H). <sup>13</sup>C NMR (100 MHz, CDCl<sub>3</sub>) δ 144.9, 144.4, 141.4, 137.0, 133.6, 129.4, 129.0, 128.5, 127.9, 127.7, 127.6, 127.4, 125.7, 78.6, 48.8, 21.6, 11.1, 9.6. HRMS (ESI): calcd for C<sub>23</sub>H<sub>21</sub>ClO<sub>3</sub>S ([M+Na]<sup>+</sup>) 435.0792, found 435.0795.

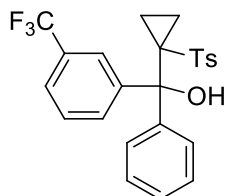

Phenyl(1-tosylcyclopropyl)(3-(trifluoromethyl)phenyl)methanol (**3ma**)

White solid; m.p. 174-175 °C; yield: 55.8 mg (63%); <sup>1</sup>H NMR (400 MHz, CDCl<sub>3</sub>) δ 7.66 (s, 1H), 7.60 (d, *J* = 8.0 Hz, 1H), 7.38-7.34 (m, 3H), 7.22-7.10 (m, 6H), 7.00 (d,

$J = 8.4$  Hz, 2H), 6.00 (s, 1H), 2.36 (s, 3H), 1.79-1.70 (m, 2H), 1.06-0.96 (m, 2H).  $^{13}\text{C}$  NMR (100 MHz,  $\text{CDCl}_3$ )  $\delta$  144.4, 143.9, 141.3, 137.0, 130.9 (q,  $J = 2.2$  Hz), 129.9 (q,  $J = 32.1$  Hz), 129.4, 128.6, 128.1, 127.8, 127.7, 127.6, 124.3-124.1 (m), 123.9 (q,  $J = 270.8$  Hz), 78.7, 48.8, 21.5, 10.9, 9.8. HRMS (ESI): calcd for  $\text{C}_{24}\text{H}_{21}\text{F}_3\text{O}_3\text{S}$  ( $[\text{M}+\text{Na}]^+$ ) 469.1056, found 469.1041.

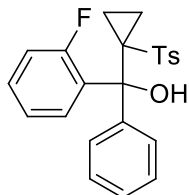

(2-Fluorophenyl)(phenyl)(1-tosylcyclopropyl)methanol (**3na**)

White solid; m.p. 164-165 °C; yield: 55.0 mg (69%);  $^1\text{H}$  NMR (400 MHz,  $\text{CDCl}_3$ )  $\delta$  7.83-7.79 (m, 1H), 7.48-7.46 (m, 2H), 7.27 (d,  $J = 8.0$  Hz, 2H), 7.23-7.18 (m, 3H), 7.10-7.07 (m, 2H), 7.01 (d,  $J = 8.0$  Hz, 2H), 6.41-6.35 (m, 1H), 5.70 (s, 1H), 2.37 (s, 3H), 1.84-1.78 (m, 1H), 1.68-1.60 (m, 1H), 1.20-1.14 (m, 1H), 1.07-1.01 (m, 1H).  $^{13}\text{C}$  NMR (100 MHz,  $\text{CDCl}_3$ )  $\delta$  158.9 (d,  $J = 243.0$  Hz), 143.7, 140.8, 136.6, 131.8 (d,  $J = 13.0$  Hz), 129.6 (d,  $J = 8.6$  Hz), 129.4 (d,  $J = 4.1$  Hz), 129.0, 128.9, 127.9, 127.8 (d,  $J = 3.7$  Hz), 127.6, 124.4 (d,  $J = 2.9$  Hz), 116.0 (d,  $J = 24.4$  Hz), 78.3 (d,  $J = 3.2$  Hz), 48.7 (d,  $J = 2.1$  Hz), 21.6, 13.7 (d,  $J = 8.6$  Hz), 9.7 (d,  $J = 2.9$  Hz). HRMS (ESI): calcd for  $\text{C}_{23}\text{H}_{21}\text{FO}_3\text{S}$  ( $[\text{M}+\text{Na}]^+$ ) 419.1088, found 419.1099.

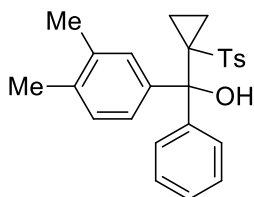

(3,4-Dimethylphenyl)(phenyl)(1-tosylcyclopropyl)methanol (**3oa**)

White solid; m.p. 142-143 °C; yield: 43.2 mg (53%);  $^1\text{H}$  NMR (400 MHz,  $\text{CDCl}_3$ )  $\delta$  7.41-7.39 (m, 2H), 7.19 (d,  $J = 8.0$  Hz, 2H), 7.11-7.07 (m, 5H), 6.98 (d,  $J = 8.0$  Hz, 2H), 6.85 (d,  $J = 8.0$  Hz, 1H), 5.74 (s, 1H), 2.37 (s, 3H), 2.14 (s, 3H), 2.05 (s, 3H), 1.73-1.63 (m, 2H), 1.08-1.01 (m, 2H).  $^{13}\text{C}$  NMR (100 MHz,  $\text{CDCl}_3$ )  $\delta$  143.6, 142.4, 139.9, 137.6, 135.7, 135.4, 129.0, 128.9, 128.6, 127.7, 127.5, 127.2, 125.1, 78.8, 49.4, 21.6, 20.0, 19.3, 10.8, 10.2. HRMS (ESI): calcd for  $\text{C}_{25}\text{H}_{26}\text{O}_3\text{S}$  ( $[\text{M}+\text{Na}]^+$ ) 429.1495, found 429.1504.



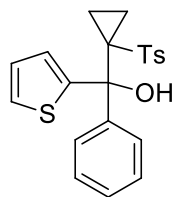

Phenyl(thiophen-2-yl)(1-tosylcyclopropyl)methanol (**3pa**)

White solid; m.p. 174-175 °C; yield: 26.3 mg (34%); <sup>1</sup>H NMR (400 MHz, CDCl<sub>3</sub>) δ 7.40-7.37 (m, 2H), 7.18 (d, *J* = 8.0 Hz, 2H), 7.13-7.09 (m, 2H), 7.06-7.00 (m, 4H), 6.68 (dd, *J* = 5.2, 3.6 Hz, 1H), 6.61 (dd, *J* = 3.6, 1.2 Hz, 1H), 6.12 (s, 1H), 2.37 (s, 3H), 1.82-1.65 (m, 2H), 1.29-1.18 (m, 2H). <sup>13</sup>C NMR (100 MHz, CDCl<sub>3</sub>) δ 147.9, 143.7, 142.5, 137.3, 129.2, 128.4, 127.8, 127.5, 126.6, 126.4, 125.4, 78.3, 49.5, 21.5, 12.0, 9.4. HRMS (ESI): calcd for C<sub>21</sub>H<sub>20</sub>O<sub>3</sub>S<sub>2</sub> ([M+Na]<sup>+</sup>) 407.0746, found 407.0746.

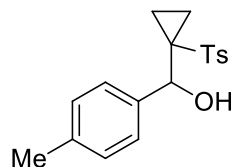

*p*-Tolyl(1-tosylcyclopropyl)methanol (**3qa**)

White solid; m.p. 94-95 °C; yield: 29.9 mg (47%); <sup>1</sup>H NMR (400 MHz, CDCl<sub>3</sub>) δ 7.79 (d, *J* = 8.0 Hz, 2H), 7.38 (d, *J* = 8.0 Hz, 2H), 7.02 (d, *J* = 8.0 Hz, 2H), 6.91 (d, *J* = 8.0 Hz, 2H), 5.27 (s, 1H), 3.70 (s, 1H), 2.49 (s, 3H), 2.28 (s, 3H), 1.68-1.62 (m, 1H), 1.37-1.31 (m, 1H), 1.12-1.07 (m, 1H), 0.41-0.36 (m, 1H). <sup>13</sup>C NMR (100 MHz, CDCl<sub>3</sub>) δ 144.8, 137.9, 135.4, 134.5, 130.0, 128.8, 128.7, 126.5, 70.9, 47.1, 21.7, 21.1, 12.9, 6.5. HRMS (ESI): calcd for C<sub>18</sub>H<sub>20</sub>O<sub>3</sub>S ([M+Na]<sup>+</sup>) 339.1025, found 339.1014.

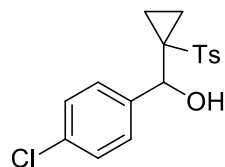

(4-Chlorophenyl)(1-tosylcyclopropyl)methanol (**3ra**)

Yellow oil; yield: 35.0 mg (52%); <sup>1</sup>H NMR (400 MHz, CDCl<sub>3</sub>) δ 7.35 (d, *J* = 8.0 Hz, 2H), 7.37 (d, *J* = 8.0 Hz, 2H), 7.18 (d, *J* = 8.0 Hz, 2H), 6.98 (d, *J* = 8.0 Hz, 2H), 5.22 (d, *J* = 1.6 Hz, 1H), 3.80 (d, *J* = 2.4 Hz, 1H), 2.49 (s, 3H), 1.72-1.66 (m, 1H), 1.44-1.38 (m, 1H), 1.09-1.04 (m, 1H), 0.46-0.40 (m, 1H). <sup>13</sup>C NMR (100 MHz, CDCl<sub>3</sub>)

$\delta$  145.0, 136.2, 135.2, 133.9, 130.0, 128.7, 128.3, 127.9, 70.7, 47.0, 21.7, 12.8, 6.9.

HRMS (ESI): calcd for  $C_{17}H_{17}ClO_3S$  ( $[M+Na]^+$ ) 359.0479, found 359.0491.

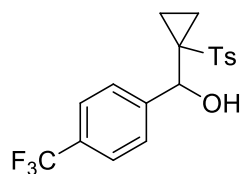

(1-Tosylcyclopropyl)(4-(trifluoromethyl)phenyl)methanol (**3sa**)

White solid; m.p. 67-68 °C; yield: 42.0 mg (57%);  $^1H$  NMR (400 MHz,  $CDCl_3$ )  $\delta$  7.69 (d,  $J = 8.0$  Hz, 2H), 7.44 (d,  $J = 8.0$  Hz, 2H), 7.32 (d,  $J = 8.0$  Hz, 2H), 7.17 (d,  $J = 8.0$  Hz, 2H), 5.23 (s, 1H), 3.87 (s, 1H), 2.46 (s, 3H), 1.75-1.69 (m, 1H), 1.53-1.47 (m, 1H), 1.15-1.09 (m, 1H), 0.53-0.48 (m, 1H).  $^{13}C$  NMR (100 MHz,  $CDCl_3$ )  $\delta$  145.0, 142.0, 135.3, 130.2 (q,  $J = 32.3$  Hz), 130.0, 128.6, 126.9, 125.0 (q,  $J = 3.8$  Hz), 123.9 (q,  $J = 270.5$  Hz), 71.2, 46.9, 21.6, 12.8, 7.7. HRMS (ESI): calcd for  $C_{18}H_{17}F_3O_3S$  ( $[M+Na]^+$ ) 393.0743, found 393.0752.

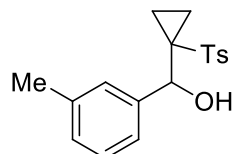

*m*-Tolyl(1-tosylcyclopropyl)methanol (**3ta**)

White solid; m.p. 117-118 °C; yield: 41.1 mg (65%);  $^1H$  NMR (400 MHz,  $CDCl_3$ )  $\delta$  7.79 (d,  $J = 8.0$  Hz, 2H), 7.38 (d,  $J = 8.0$  Hz, 2H), 7.12-7.08 (t,  $J = 7.6$  Hz, 1H), 7.01 (d,  $J = 8.0$  Hz, 1H), 6.86 (s, 1H), 6.78 (d,  $J = 8.0$  Hz, 1H), 5.26 (s, 1H), 3.70 (s, 1H), 2.49 (s, 3H), 2.25 (s, 3H), 1.69-1.62 (m, 1H), 1.39-1.34 (m, 1H), 1.15-1.09 (m, 1H), 0.44-0.38 (m, 1H).  $^{13}C$  NMR (100 MHz,  $CDCl_3$ )  $\delta$  144.8, 137.8, 137.5, 135.4, 129.9, 128.8, 128.7, 128.0, 127.0, 123.8, 71.1, 47.1, 21.7, 21.4, 13.0, 6.7. HRMS (ESI): calcd for  $C_{18}H_{20}O_3S$  ( $[M+Na]^+$ ) 339.1025, found 339.1025.

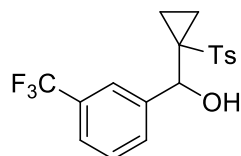

(1-Tosylcyclopropyl)(3-(trifluoromethyl)phenyl)methanol (**3ua**)

Yellow oil; yield: 39.5 mg (53%);  $^1H$  NMR (400 MHz,  $CDCl_3$ )  $\delta$  7.72 (d,  $J = 8.0$  Hz, 2H), 7.47 (d,  $J = 8.0$  Hz, 1H), 7.37-7.33 (m, 3H), 7.29 (s, 1H), 7.26 (d,  $J = 8.0$  Hz,

1H), 5.26 (d,  $J = 3.2$  Hz, 1H), 3.88 (d,  $J = 3.2$  Hz, 1H), 2.48 (s, 3H), 1.76-1.70 (m, 1H), 1.51-1.45 (m, 1H), 1.12-1.07 (m, 1H), 0.48-0.43 (m, 1H).  $^{13}\text{C}$  NMR (100 MHz,  $\text{CDCl}_3$ )  $\delta$  145.1, 139.0, 135.2, 130.6 (q,  $J = 32.3$  Hz), 130.0, 128.6, 124.9 (q,  $J = 3.7$  Hz), 123.8 (q,  $J = 270.7$  Hz), 123.3 (q,  $J = 3.8$  Hz), 71.1, 46.9, 21.7, 12.8, 7.3. HRMS (ESI): calcd for  $\text{C}_{18}\text{H}_{17}\text{F}_3\text{O}_3\text{S}$  ( $[\text{M}+\text{Na}]^+$ ) 393.0743, found 393.0751.

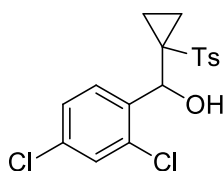

(2,4-Dichlorophenyl)(1-tosylcyclopropyl)methanol (**3va**)

White solid; m.p. 132-133 °C; yield: 43.8 mg (59%);  $^1\text{H}$  NMR (400 MHz,  $\text{CDCl}_3$ )  $\delta$  7.87 (d,  $J = 8.4$  Hz, 2H), 7.50 (d,  $J = 8.4$  Hz, 1H), 7.41 (d,  $J = 8.4$  Hz, 2H), 7.24 (dd,  $J = 2.0$  Hz, 8.4 Hz, 1H), 7.18 (d,  $J = 8.4$  Hz, 1H), 5.58 (s, 1H), 3.99 (d,  $J = 1.6$  Hz, 1H), 2.49 (s, 3H), 1.75-1.71 (m, 1H), 1.42-1.36 (m, 1H), 0.95-0.90 (m, 1H), 0.24-0.18 (m, 1H).  $^{13}\text{C}$  NMR (100 MHz,  $\text{CDCl}_3$ )  $\delta$  145.2, 134.6, 134.5, 133.5, 133.2, 129.9, 129.2, 128.8, 128.7, 127.3, 67.3, 45.8, 21.7, 13.9, 5.9. HRMS (ESI): calcd for  $\text{C}_{17}\text{H}_{16}\text{Cl}_2\text{O}_3\text{S}$  ( $[\text{M}+\text{Na}]^+$ ) 393.0089, found 393.0089.

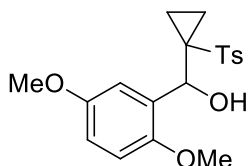

(2,5-Dimethoxyphenyl)(1-tosylcyclopropyl)methanol (**3wa**)

White solid; m.p. 168-169 °C; yield: 36.0 mg (50%);  $^1\text{H}$  NMR (400 MHz,  $\text{CDCl}_3$ )  $\delta$  7.86 (d,  $J = 8.0$  Hz, 2H), 7.41 (d,  $J = 8.0$  Hz, 2H), 6.99 (d,  $J = 3.2$  Hz, 1H), 6.71 (dd,  $J = 3.2$  Hz, 8.8 Hz, 1H), 6.57 (d,  $J = 8.8$  Hz, 1H), 5.59 (s, 1H), 3.74 (s, 3H), 3.68 (d,  $J = 2.0$  Hz, 1H), 3.24 (s, 3H), 2.50 (s, 3H), 1.70-1.64 (m, 1H), 1.33-1.26 (m, 1H), 1.05-0.99 (m, 1H), 0.27-0.21 (m, 1H).  $^{13}\text{C}$  NMR (100 MHz,  $\text{CDCl}_3$ )  $\delta$  153.7, 149.9, 144.4, 135.7, 129.5, 129.0, 126.6, 113.7, 112.4, 110.6, 65.6, 55.7, 55.1, 46.2, 21.7, 13.8, 6.3. HRMS (ESI): calcd for  $\text{C}_{19}\text{H}_{22}\text{O}_5\text{S}$  ( $[\text{M}+\text{Na}]^+$ ) 385.1080, found 385.1080.

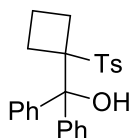

Diphenyl(1-tosylcyclobutyl)methanol (**3xa**)

White solid; m.p. 170-171 °C; yield: 26.3 mg (34%); <sup>1</sup>H NMR (400 MHz, CDCl<sub>3</sub>) δ 7.46-7.45 (m, 4H), 7.34 (d, *J* = 8.4 Hz, 2H), 7.16-7.09 (m, 6H), 7.04 (d, *J* = 8.0 Hz, 2H), 5.40 (s, 1H), 3.03-2.95 (m, 2H), 2.85-2.77 (m, 2H), 2.38 (s, 3H), 1.82-1.71 (m, 1H), 0.96-0.85 (m, 1H). <sup>13</sup>C NMR (100 MHz, CDCl<sub>3</sub>) δ 144.0, 142.9, 135.8, 129.5, 129.3, 127.7, 127.5, 127.1, 79.3, 74.7, 27.1, 21.6, 15.1. HRMS (ESI): calcd for C<sub>24</sub>H<sub>24</sub>O<sub>3</sub>S ([M+H]<sup>+</sup>) 393.1519, found 393.1522.

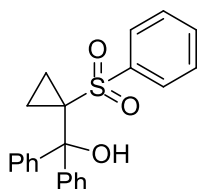

Diphenyl(1-(phenylsulfonyl)cyclopropyl)methanol (**3ab**)

White solid; m.p. 201-202 °C; yield: 56.6 mg (78%); <sup>1</sup>H NMR (400 MHz, CDCl<sub>3</sub>) δ 7.47-7.42 (m, 1H), 7.40-7.37 (m, 4H), 7.36-7.32 (m, 2H), 7.24-7.20 (m, 2H), 7.13-7.05 (m, 6H), 5.76 (s, 1H), 1.74-1.71 (m, 2H), 1.08-1.04 (m, 2H). <sup>13</sup>C NMR (100 MHz, CDCl<sub>3</sub>) δ 142.2, 140.6, 132.8, 128.6, 128.5, 127.6, 127.5, 127.4, 79.0, 49.2, 10.6. HRMS (ESI): calcd for C<sub>22</sub>H<sub>20</sub>O<sub>3</sub>S ([M+H]<sup>+</sup>) 365.1206, found 365.1209.

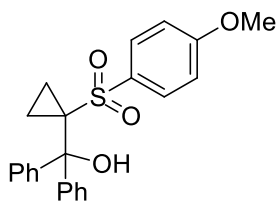

(1-((4-Methoxyphenyl)sulfonyl)cyclopropyl)diphenylmethanol (**3ac**)

White solid; m.p. 145-146 °C; yield: 57.4 mg (73%); <sup>1</sup>H NMR (400 MHz, CDCl<sub>3</sub>) δ 7.40 (m, 4H), 7.27-7.23 (m, 2H), 7.12-7.06 (m, 6H), 6.68-6.64 (m, 2H), 5.83 (s, 1H), 3.83 (s, 3H), 1.69-1.66 (m, 2H), 1.04-1.01 (m, 2H). <sup>13</sup>C NMR (100 MHz, CDCl<sub>3</sub>) δ 163.2, 142.4, 131.9, 130.7, 127.7, 127.5, 127.3, 113.9, 79.0, 55.7, 49.0, 10.5. HRMS (ESI): calcd for C<sub>23</sub>H<sub>22</sub>O<sub>4</sub>S ([M+Na]<sup>+</sup>) 417.1131, found 417.1132.

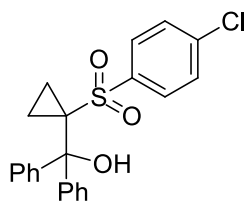

(1-((4-Chlorophenyl)sulfonyl)cyclopropyl)diphenylmethanol (**3ad**)

White solid; m.p. 204-205 °C; yield: 56.4 mg (71%); <sup>1</sup>H NMR (400 MHz, CDCl<sub>3</sub>) δ 7.39-7.37 (m, 4H), 7.26-7.24 (m, 2H), 7.19-7.08 (m, 8H), 5.66 (s, 1H), 1.73-1.69 (m, 2H), 1.09-1.06 (m, 2H). <sup>13</sup>C NMR (100 MHz, CDCl<sub>3</sub>) δ 142.1, 139.7, 139.0, 130.0, 128.9, 127.7, 127.6, 127.5, 78.8, 49.3, 10.6. HRMS (ESI): calcd for C<sub>22</sub>H<sub>19</sub>ClO<sub>3</sub>S ([M+Na]<sup>+</sup>) 421.0636, found 421.0636.

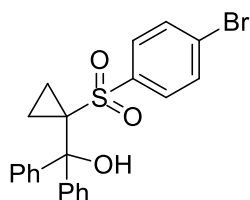

(1-((4-Bromophenyl)sulfonyl)cyclopropyl)diphenylmethanol (**3ae**)

White solid; m.p. 180-181 °C; yield: 71.4 mg (81%); <sup>1</sup>H NMR (400 MHz, CDCl<sub>3</sub>) δ 7.39-7.32 (m, 6H), 7.19-7.08 (m, 8H), 5.65 (s, 1H), 1.73-1.69 (m, 2H), 1.09-1.06 (m, 2H). <sup>13</sup>C NMR (100 MHz, CDCl<sub>3</sub>) δ 142.1, 139.5, 131.8, 130.0, 128.3, 127.7, 127.6, 127.5, 78.8, 49.3, 10.6. HRMS (ESI): calcd for C<sub>22</sub>H<sub>19</sub>BrO<sub>3</sub>S ([M+Na]<sup>+</sup>) 465.0130, found 465.0119.

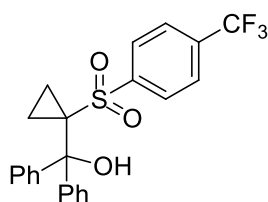

Diphenyl(1-((4-(trifluoromethyl)phenyl)sulfonyl)cyclopropyl)methanol (**3af**)

White solid; m.p. 161-162 °C; yield: 68.1 mg (79%); <sup>1</sup>H NMR (400 MHz, CDCl<sub>3</sub>) δ 7.46 (s, 4H), 7.38-7.36 (m, 4H), 7.15-7.05 (m, 6H), 5.62 (s, 1H), 1.78-1.75 (m, 2H), 1.13-1.10 (m, 2H). <sup>13</sup>C NMR (100 MHz, CDCl<sub>3</sub>) δ 144.0, 141.9, 134.3 (q, *J* = 32.8 Hz), 129.0, 127.7, 127.6, 125.6 (q, *J* = 3.7 Hz), 123.2 (q, *J* = 271.4 Hz), 78.7, 49.4, 10.6. HRMS (ESI): calcd for C<sub>23</sub>H<sub>19</sub>F<sub>3</sub>O<sub>3</sub>S ([M+Na]<sup>+</sup>) 455.0899, found 455.0902.

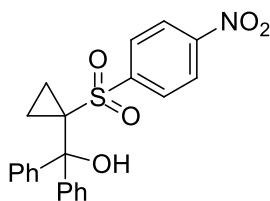

(1-((4-Nitrophenyl)sulfonyl)cyclopropyl)diphenylmethanol (**3ag**)

White solid; m.p. 191-192 °C; yield: 74.6 mg (91%); <sup>1</sup>H NMR (400 MHz, CDCl<sub>3</sub>) δ 8.04 (d, *J* = 8.8 Hz, 2H), 7.52 (d, *J* = 9.2 Hz, 2H), 7.40-7.37 (m, 4H), 7.17-7.07 (m, 6H), 5.48 (s, 1H), 1.80-1.76 (m, 2H), 1.17-1.31 (m, 2H). <sup>13</sup>C NMR (100 MHz, CDCl<sub>3</sub>) δ 149.9, 146.2, 141.9, 129.9, 127.8, 127.7, 123.5, 78.7, 49.8, 10.9. HRMS (ESI): calcd for C<sub>22</sub>H<sub>19</sub>NO<sub>5</sub>S ([M+Na]<sup>+</sup>) 432.0876, found 432.0878.

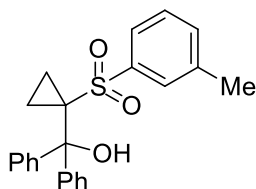

Diphenyl(1-(m-tolylsulfonyl)cyclopropyl)methanol (**3ah**)

White solid; m.p. 169-170 °C; yield: 55.7 mg (74%); <sup>1</sup>H NMR (400 MHz, CDCl<sub>3</sub>) δ 7.41-7.38 (m, 4H), 7.27-7.24 (m, 2H), 7.19-7.15 (m, 1H), 7.13-7.05 (m, 6H), 6.98 (s, 1H), 5.80 (s, 1H), 2.19 (s, 3H), 1.74-1.71 (m, 2H), 1.07-1.04 (m, 2H). <sup>13</sup>C NMR (100 MHz, CDCl<sub>3</sub>) δ 142.2, 140.3, 138.8, 133.9, 129.4, 128.5, 127.6, 127.4, 125.7, 78.9, 49.3, 21.2, 10.5. HRMS (ESI): calcd for C<sub>23</sub>H<sub>22</sub>O<sub>3</sub>S ([M+Na]<sup>+</sup>) 401.1182, found 401.1188.

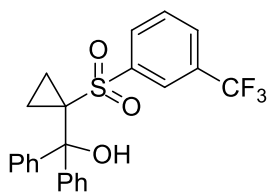

Diphenyl(1-((3-(trifluoromethyl)phenyl)sulfonyl)cyclopropyl)methanol (**3al**)

White solid; m.p. 162-163 °C; yield: 65.1 mg (75%); <sup>1</sup>H NMR (400 MHz, CDCl<sub>3</sub>) δ 7.70 (d, *J* = 8.0 Hz, 1H), 7.59-7.55 (m, 2H), 7.42-7.37 (m, 5H), 7.14-7.05 (m, 6H), 5.59 (s, 1H), 1.80-1.77 (m, 2H), 1.15-1.11 (m, 2H). <sup>13</sup>C NMR (100 MHz, CDCl<sub>3</sub>) δ 142.1, 141.8, 131.7, 131.3 (q, *J* = 33.3 Hz), 129.7 (q, *J* = 3.4 Hz), 129.4, 127.8, 127.7, 127.6, 125.6 (q, *J* = 4.0 Hz), 123.0 (q, *J* = 271.4 Hz), 78.7, 49.5, 10.7. HRMS (ESI): calcd for C<sub>23</sub>H<sub>19</sub>F<sub>3</sub>O<sub>3</sub>S ([M+Na]<sup>+</sup>) 455.0899, found 455.0892.

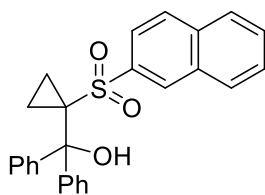

(1-(Naphthalen-2-ylsulfonyl)cyclopropyl)diphenylmethanol (**3aj**)

White solid; m.p. 199-200 °C; yield: 56.0 mg (68%); <sup>1</sup>H NMR (400 MHz, CDCl<sub>3</sub>) δ 7.84 (d, *J* = 8.4 Hz, 1H), 7.78 (s, 1H), 7.73 (d, *J* = 8.4 Hz, 1H), 7.67-7.60 (m, 2H), 7.55-7.51 (m, 1H), 7.46 (dd, *J* = 2.0, 8.8 Hz, 1H), 7.39-7.36 (m, 4H), 6.97-6.90 (m, 6H), 5.83 (s, 1H), 1.81-1.78 (m, 2H), 1.10-1.07 (m, 2H). <sup>13</sup>C NMR (100 MHz, CDCl<sub>3</sub>) δ 142.1, 137.3, 134.8, 131.9, 131.0, 129.7, 129.2, 128.7, 127.6 (2C), 127.4 (2C), 127.2, 123.2, 79.0, 49.2, 10.6. HRMS (ESI): calcd for C<sub>26</sub>H<sub>22</sub>O<sub>3</sub>S ([M+Na]<sup>+</sup>) 437.1182, found 437.1161.

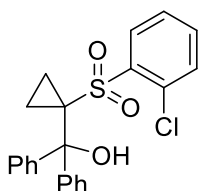

(1-((2-Chlorophenyl)sulfonyl)cyclopropyl)diphenylmethanol (**3ak**)

White solid; m.p. 156-157 °C; yield: 37.8 mg (47%); <sup>1</sup>H NMR (400 MHz, CDCl<sub>3</sub>) δ 7.50-7.47 (m, 4H), 7.39-7.36 (m, 2H), 7.30-7.25 (m, 1H), 7.10-7.05 (m, 6H), 6.95-6.91 (m, 1H), 5.76 (s, 1H), 2.01-1.98 (m, 2H), 1.15-1.12 (m, 2H). <sup>13</sup>C NMR (100 MHz, CDCl<sub>3</sub>) δ 142.2, 138.6, 133.8, 133.3, 132.1, 131.4, 127.6, 127.5, 127.4, 127.1, 78.9, 49.6, 10.1. HRMS (ESI): calcd for C<sub>22</sub>H<sub>19</sub>ClO<sub>3</sub>S ([M+Na]<sup>+</sup>) 421.0636, found 421.0640.

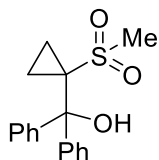

(1-(Methylsulfonyl)cyclopropyl)diphenylmethanol (**3al**)

White solid; m.p. 96-97 °C; yield: 55.0 mg (91%); <sup>1</sup>H NMR (400 MHz, CDCl<sub>3</sub>) δ 7.58-7.55 (m, 4H), 7.36-7.25 (m, 6H), 4.71 (s, 1H), 2.64 (s, 3H), 1.59-1.55 (m, 2H), 1.03-0.99 (m, 2H). <sup>13</sup>C NMR (100 MHz, CDCl<sub>3</sub>) δ 143.2, 128.1, 128.0, 127.9, 78.9, 47.8, 43.1, 10.5. HRMS (ESI): calcd for C<sub>17</sub>H<sub>18</sub>O<sub>3</sub>S ([M+Na]<sup>+</sup>) 325.0869, found

325.0862.

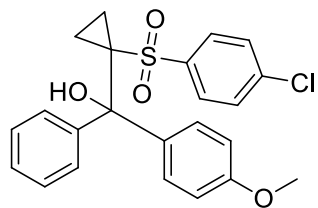

(1-((4-Chlorophenyl)sulfonyl)cyclopropyl)(4-methoxyphenyl)(phenyl)methanol (**3gd**)

White solid; m.p. 61-62 °C; yield: 53.1 mg (62%); <sup>1</sup>H NMR (400 MHz, CDCl<sub>3</sub>) δ 7.38-7.35 (m, 2H), 7.29-7.23 (m, 4H), 7.20-7.07 (m, 5H), 6.61 (d, *J* = 9.2 Hz, 2H), 5.61 (s, 1H), 3.74 (s, 3H), 1.72-1.69 (m, 2H), 1.08-1.05 (m, 2H). <sup>13</sup>C NMR (100 MHz, CDCl<sub>3</sub>) δ 158.9, 142.3, 139.5, 139.1, 134.1, 129.9, 128.9, 128.8, 127.6, 127.5, 127.4, 112.8, 78.6, 55.2, 49.6, 10.6, 10.5. HRMS (ESI): calcd for C<sub>23</sub>H<sub>21</sub>ClO<sub>4</sub>S ([M+Na]<sup>+</sup>) 451.0741, found 451.0756.

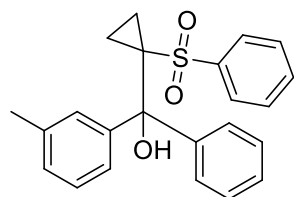

Phenyl(1-(phenylsulfonyl)cyclopropyl)(*m*-tolyl)methanol (**3kb**)

White solid; m.p. 112-113 °C; yield: 62.3 mg (82%); <sup>1</sup>H NMR (400 MHz, CDCl<sub>3</sub>) δ 7.47-7.43 (m, 1H), 7.41-7.38 (m, 2H), 7.35-7.32 (m, 2H), 7.25-7.19 (m, 3H), 7.16 (d, *J* = 8.0 Hz, 1H), 7.12-7.06 (m, 3H), 6.96 (t, *J* = 7.6 Hz, 1H), 6.93-6.90 (m, 1H), 5.76 (s, 1H), 2.16 (s, 3H), 1.76-1.68 (m, 2H), 1.02-1.04 (m, 2H). <sup>13</sup>C NMR (100 MHz, CDCl<sub>3</sub>) δ 142.3, 142.1, 140.6, 137.1, 132.8, 128.6, 128.5, 128.3, 128.2, 127.7, 127.6, 127.5, 127.4, 124.8, 78.9, 49.3, 21.6, 10.8, 10.4. HRMS (ESI): calcd for C<sub>23</sub>H<sub>22</sub>O<sub>3</sub>S ([M+Na]<sup>+</sup>) 401.1182, found 401.1187.

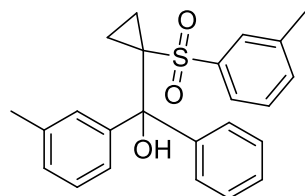

Phenyl(*m*-tolyl)(1-(*m*-tolylsulfonyl)cyclopropyl)methanol (**3kh**)

White solid; m.p. 134-135 °C; yield: 66.5 mg (85%); <sup>1</sup>H NMR (400 MHz, CDCl<sub>3</sub>) δ 7.42-7.40 (m, 2H), 7.26-7.21 (m, 3H), 7.18-7.15 (m, 2H), 7.11-7.05 (m, 3H),



6.98-6.89 (m, 3H), 5.81 (s, 1H), 2.18 (s, 3H), 2.15 (s, 3H), 1.77-1.67 (m, 2H), 1.10-1.02 (m, 2H).  $^{13}\text{C}$  NMR (100 MHz,  $\text{CDCl}_3$ )  $\delta$  142.3, 142.1, 140.4, 138.7, 137.0, 133.9, 129.4, 128.4, 128.3, 128.2, 127.7, 127.4, 127.3, 125.7, 124.8, 78.9, 49.4, 21.6, 21.2, 10.8, 10.2. HRMS (ESI): calcd for  $\text{C}_{24}\text{H}_{24}\text{O}_3\text{S}$  ( $[\text{M}+\text{Na}]^+$ ) 415.1338, found 415.1141.

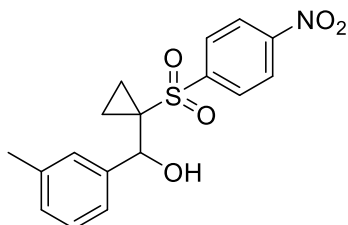

(1-((4-Nitrophenyl)sulfonyl)cyclopropyl)(*m*-tolyl)methanol (**3kg**)

White solid; m.p. 119-120 °C; yield: 43.1 mg (62%);  $^1\text{H}$  NMR (400 MHz,  $\text{CDCl}_3$ )  $\delta$  8.31 (d,  $J = 8.0$  Hz, 2H), 7.97 (d,  $J = 8.4$  Hz, 2H), 7.10 (d,  $J = 7.6$  Hz, 1H), 7.02 (d,  $J = 7.6$  Hz, 1H), 6.87-6.85 (m, 2H), 5.24 (s, 1H), 3.31 (br, 1H), 2.23 (s, 3H), 1.69-1.56 (m, 2H), 1.31-1.24 (m, 1H), 0.73-0.68 (m, 1H).  $^{13}\text{C}$  NMR (100 MHz,  $\text{CDCl}_3$ )  $\delta$  150.5, 145.1, 138.2, 137.9, 130.0, 129.2, 128.3, 127.1, 124.0, 123.7, 71.7, 47.0, 21.3, 12.5, 8.4. HRMS (ESI): calcd for  $\text{C}_{17}\text{H}_{17}\text{NO}_5\text{S}$  ( $[\text{M}+\text{Na}]^+$ ) 370.0720, found 370.0733.

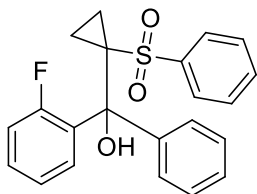

(2-Fluorophenyl)(phenyl)(1-(phenylsulfonyl)cyclopropyl)methanol (**3nb**)

White solid; m.p. 159-160 °C; yield: 53.6 mg (70%);  $^1\text{H}$  NMR (400 MHz,  $\text{CDCl}_3$ )  $\delta$  7.84-7.80 (m, 1H), 7.48-7.43 (m, 3H), 7.38 (d,  $J = 8.0$  Hz, 2H), 7.25-7.18 (m, 5H), 7.12-7.04 (m, 2H), 6.38-6.33 (m, 1H), 5.67 (s, 1H), 1.89-1.83 (m, 1H), 1.74-1.68 (m, 1H), 1.23-1.16 (m, 1H), 1.10-1.04 (m, 1H).  $^{13}\text{C}$  NMR (100 MHz,  $\text{CDCl}_3$ )  $\delta$  158.9 (d,  $J = 242.9$  Hz), 140.7, 139.7, 132.8, 131.6 (d,  $J = 13.0$  Hz), 129.9 (d,  $J = 8.6$  Hz), 129.3 (d,  $J = 4.1$  Hz), 128.9, 128.2, 128.0, 127.8 (d,  $J = 3.8$  Hz), 127.7, 124.4 (d,  $J = 2.8$  Hz), 116.1 (d,  $J = 24.5$  Hz), 78.2 (d,  $J = 3.1$  Hz), 48.8, 13.8 (d,  $J = 8.5$  Hz), 9.6 (d,  $J = 2.9$  Hz). HRMS (ESI): calcd for  $\text{C}_{22}\text{H}_{19}\text{FO}_3\text{S}$  ( $[\text{M}+\text{Na}]^+$ ) 405.0931, found 405.0937.

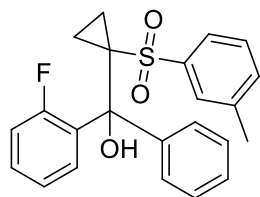

(2-Fluorophenyl)(phenyl)(1-(m-tolylsulfonyl)cyclopropyl)methanol (**3nh**)

White solid; m.p. 132-133 °C; yield: 64.2 mg (81%); <sup>1</sup>H NMR (400 MHz, CDCl<sub>3</sub>) δ 7.85-7.81 (m, 1H), 7.49-7.46 (m, 2H), 7.29-7.26 (m, 2H), 7.24-7.15 (m, 4H), 7.12-7.05 (m, 3H), 6.40-6.34 (m, 1H), 5.73 (s, 1H), 2.21 (s, 3H), 1.90-1.84 (m, 1H), 1.72-1.66 (m, 1H), 1.23-1.16 (m, 1H), 1.10-1.04 (m, 1H). <sup>13</sup>C NMR (100 MHz, CDCl<sub>3</sub>) δ 159.0 (d, *J* = 243.2 Hz), 140.6, 139.4, 138.3, 133.8, 131.6 (d, *J* = 13.2 Hz), 129.8 (d, *J* = 8.6 Hz), 129.4, 129.3 (d, *J* = 4.1 Hz), 128.1, 127.9, 127.8 (d, *J* = 3.9 Hz), 127.7, 126.2, 124.2 (d, *J* = 2.9 Hz), 115.9 (d, *J* = 24.5 Hz), 78.1 (d, *J* = 3.4 Hz), 48.9 (d, *J* = 2.3 Hz), 21.2, 13.8 (d, *J* = 8.7 Hz), 9.5 (d, *J* = 3.2 Hz). HRMS (ESI): calcd for C<sub>23</sub>H<sub>21</sub>FO<sub>3</sub>S ([M+Na]<sup>+</sup>) 419.1088, found 419.1096.

**Table S1. Optimization of Reaction Conditions<sup>a,b</sup>**

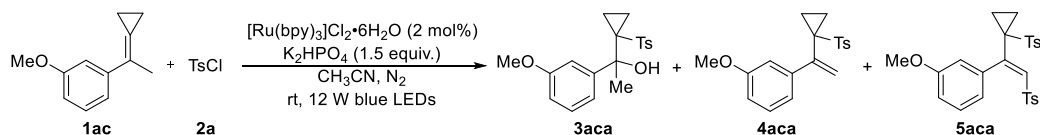

| entry           | <b>1ac/2a</b> | <i>t</i> /h | solvent                                  | Yield (%)<br><b>3aca/4aca/5aca</b> |
|-----------------|---------------|-------------|------------------------------------------|------------------------------------|
| 1               | 1/1.5         | 3           | CH <sub>3</sub> CN:H <sub>2</sub> O=30:1 | 0/15%/8%                           |
| 2 <sup>c)</sup> | 1/1.5         | 3           | CH <sub>3</sub> CN:H <sub>2</sub> O=30:1 | 0/21%/4%                           |
| 3 <sup>d)</sup> | 1/1.5         | 3           | CH <sub>3</sub> CN:H <sub>2</sub> O=30:1 | 0/36%/0                            |
| 4               | 1/1.5         | 3           | CH <sub>3</sub> CN                       | 0/29%/0                            |
| 5               | 1/1.5         | 12          | CH <sub>3</sub> CN                       | 0/38%/5%                           |
| 6 <sup>e)</sup> | 1/3           | 30          | CH <sub>3</sub> CN                       | 0/0/39%                            |
| 7 <sup>f)</sup> | 1/3           | 30          | CH <sub>3</sub> CN                       | 0/0/24%                            |

|                  |        |    |                    |          |
|------------------|--------|----|--------------------|----------|
| 8                | 1/1.05 | 12 | CH <sub>3</sub> CN | 0/59%/5% |
| 9                | 1.5/1  | 12 | CH <sub>3</sub> CN | 0/46%/0  |
| 10               | 1.5/1  | 16 | CH <sub>3</sub> CN | 0/63%/0  |
| 11               | 1.5/1  | 20 | CH <sub>3</sub> CN | 0/60%/0  |
| 12 <sup>g)</sup> | 1.5/1  | 16 | CH <sub>3</sub> CN | 0/60%/0  |

<sup>a)</sup> Reactions were carried out using **1** (0.3 mmol), **2a** (0.2 mmol), [Ru(bpy)<sub>3</sub>]Cl<sub>2</sub>•6H<sub>2</sub>O (2 mol%), base (0.3 mmol) and in a solvent (1 mL) at room temperature and 12 W blue LEDs light irradiation for 16 h under N<sub>2</sub> atmosphere. <sup>b)</sup> Isolated yield. <sup>c)</sup> NaHCO<sub>3</sub> (1.5 equiv.) was applied as the base. <sup>d)</sup> 50 °C. <sup>e)</sup> [Ru(bpy)<sub>3</sub>]Cl<sub>2</sub>•6H<sub>2</sub>O (5 mol%). <sup>f)</sup> [Ru(bpy)<sub>3</sub>]Cl<sub>2</sub>•6H<sub>2</sub>O (5 mol%) and K<sub>2</sub>HPO<sub>4</sub> (3.0 equiv.). <sup>g)</sup> [Ru(bpy)<sub>3</sub>]Cl<sub>2</sub> (2 mol%).

### Synthesis of cyclopropyl styrenes **4**

ACPs (**1**, 0.3 mmol), TsCl (**2a**, 0.2 mmol), [Ru(bpy)<sub>3</sub>]Cl<sub>2</sub>•6H<sub>2</sub>O (2 mol %), and K<sub>2</sub>HPO<sub>4</sub> (1.5 equiv.) was added in CH<sub>3</sub>CN (1 mL) at room temperature and 12 W blue LEDs light irradiation for 16 h under N<sub>2</sub> atmosphere. After the reaction, CH<sub>3</sub>CN was removed under reduced pressure, purification was finally performed by flash column chromatography on silica gel using EtOAc and petroleum ether to give the desired product **4**.

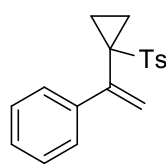

#### 1-Methyl-4-((1-(1-phenylvinyl)cyclopropyl)sulfonyl)benzene (**4ya**)

White solid; m.p. 112-113 °C; yield: 50.0 mg (84%); <sup>1</sup>H NMR (400 MHz, CDCl<sub>3</sub>) δ 7.64 (d, *J* = 8.0 Hz, 2H), 7.45-7.40 (m, 2H), 7.25-7.22 (m, 5H), 5.71 (s, 1H), 5.06 (s, 1H), 2.41 (s, 3H), 1.97-1.94 (m, 2H), 1.15-1.12 (m, 2H). <sup>13</sup>C NMR (100 MHz, CDCl<sub>3</sub>) δ 144.3, 142.2, 138.2, 135.2, 129.5, 129.3, 128.1, 127.9, 126.9, 123.2, 46.6, 21.6, 14.6. HRMS (ESI): calcd for C<sub>18</sub>H<sub>18</sub>O<sub>2</sub>S ([M+H]<sup>+</sup>) 299.1100, found 299.1082.

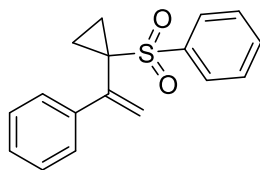

(1-(1-(Phenylsulfonyl)cyclopropyl)vinyl)benzene (**4yb**)

White solid; m.p. 68-69 °C; yield: 39.7 mg (70%); <sup>1</sup>H NMR (400 MHz, CDCl<sub>3</sub>) δ 7.78-7.75 (m, 2H), 7.60-7.55 (m, 1H), 7.47-7.39 (m, 4H), 7.25-7.21 (m, 3H), 5.72 (s, 1H), 5.06 (s, 1H), 2.00-1.97 (m, 2H), 1.18-1.14 (m, 2H). <sup>13</sup>C NMR (100 MHz, CDCl<sub>3</sub>) δ 142.1, 138.1, 133.4, 129.4, 128.7, 128.1, 128.0, 126.9, 123.3, 46.6, 14.7. HRMS (ESI): calcd for C<sub>17</sub>H<sub>16</sub>O<sub>2</sub>S ([M+Na]<sup>+</sup>) 307.0763, found 307.0775.

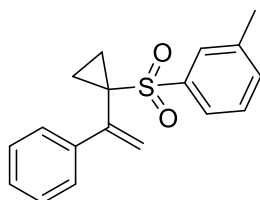

1-Methyl-3-((1-(1-phenylvinyl)cyclopropyl)sulfonyl)benzene (**4yh**)

Yellow liquid; yield: 38.6 mg (65%); <sup>1</sup>H NMR (400 MHz, CDCl<sub>3</sub>) δ 7.58-7.55 (m, 1H), 7.54 (s, 1H), 7.43-7.39 (m, 2H), 7.37-7.30 (m, 2H), 7.24-7.21 (m, 3H), 5.72 (s, 1H), 5.09 (s, 1H), 2.35 (s, 3H), 1.99-1.95 (m, 2H), 1.18-1.15 (m, 2H). <sup>13</sup>C NMR (100 MHz, CDCl<sub>3</sub>) δ 142.1, 138.8, 138.2, 138.0, 134.2, 129.8, 128.5, 128.0, 127.9, 126.9, 126.5, 123.2, 46.6, 21.3, 14.6. HRMS (ESI): calcd for C<sub>18</sub>H<sub>18</sub>O<sub>2</sub>S ([M+Na]<sup>+</sup>) 321.0920, found 321.0932.

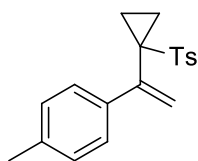

1-Methyl-4-((1-(1-(*p*-tolyl)vinyl)cyclopropyl)sulfonyl)benzene (**4za**)

White solid; m.p. 115-116 °C; yield: 38.8 mg (62%); <sup>1</sup>H NMR (400 MHz, CDCl<sub>3</sub>) δ 7.63 (d, *J* = 8.0 Hz, 2H), 7.32 (d, *J* = 8.0 Hz, 2H), 7.23 (d, *J* = 8.0 Hz, 2H), 7.05 (d, *J* = 8.0 Hz, 2H), 5.66 (s, 1H), 4.99 (s, 1H), 2.41 (s, 3H), 2.31 (s, 3H), 1.96-1.92 (m, 2H), 1.15-1.12 (m, 2H). <sup>13</sup>C NMR (100 MHz, CDCl<sub>3</sub>) δ 144.2, 142.0, 137.8, 135.4, 135.2, 129.4, 129.2, 128.8, 126.8, 122.2, 46.6, 21.6, 21.1, 14.6. HRMS (ESI): calcd for C<sub>19</sub>H<sub>20</sub>O<sub>2</sub>S ([M+Na]<sup>+</sup>) 335.1076, found 335.1068.

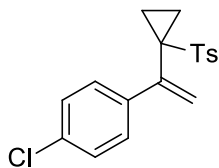

1-Chloro-4-(1-(1-tosylcyclopropyl)vinyl)benzene (**4aaa**)

White solid; m.p. 141-142 °C; yield: 42.7 mg (64%); <sup>1</sup>H NMR (400 MHz, CDCl<sub>3</sub>) δ 7.61 (d, *J* = 8.4 Hz, 2H), 7.39-7.35 (m, 2H), 7.24 (d, *J* = 8.0 Hz, 2H), 7.22-7.18 (m, 2H), 5.69 (s, 1H), 5.05 (s, 1H), 2.43 (s, 3H), 1.97-1.94 (m, 2H), 1.15-1.11 (m, 2H). <sup>13</sup>C NMR (100 MHz, CDCl<sub>3</sub>) δ 144.5, 141.2, 136.7, 135.0, 133.9, 129.4, 129.3, 128.2, 123.5, 46.6, 21.6, 14.5. HRMS (ESI): calcd for C<sub>18</sub>H<sub>17</sub>ClO<sub>2</sub>S ([M+H]<sup>+</sup>) 333.0711, found 333.0704.

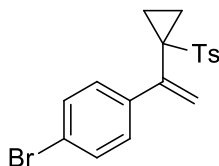

1-Bromo-4-(1-(1-tosylcyclopropyl)vinyl)benzene (**4aba**)

White solid; m.p. 135-136 °C; yield: 46.3 mg (62%); <sup>1</sup>H NMR (400 MHz, CDCl<sub>3</sub>) δ 7.61 (d, *J* = 8.0 Hz, 2H), 7.38-7.34 (m, 2H), 7.32-7.28 (m, 2H), 7.24 (d, *J* = 8.0 Hz, 2H), 5.70 (s, 1H), 5.06 (s, 1H), 2.43 (s, 3H), 1.97 (s, 3H), 1.97-1.94 (m, 2H), 1.15-1.11 (m, 2H). <sup>13</sup>C NMR (100 MHz, CDCl<sub>3</sub>) δ 144.5, 141.3, 137.2, 135.0, 131.2, 129.4, 129.3, 128.5, 123.5, 122.2, 46.5, 21.6, 14.5. HRMS (ESI): calcd for C<sub>18</sub>H<sub>17</sub>BrO<sub>2</sub>S ([M+H]<sup>+</sup>) 377.0205, found 377.0220.

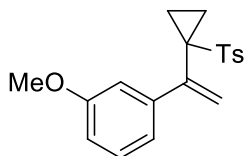

1-Methoxy-3-(1-(1-tosylcyclopropyl)vinyl)benzene (**4aca**)

Yellow oil; yield: 41.0 mg (63%); <sup>1</sup>H NMR (400 MHz, CDCl<sub>3</sub>) δ 7.65 (d, *J* = 8.0 Hz, 2H), 7.24 (d, *J* = 8.0 Hz, 2H), 7.17 (t, *J* = 8.0 Hz, 1H), 7.01-6.98 (m, 1H), 6.95-6.94 (m, 1H), 6.80-6.77 (m, 1H), 5.71 (s, 1H), 5.09 (s, 1H), 3.76 (s, 3H), 2.41 (s, 3H), 1.97-1.93 (m, 2H), 1.15-1.12 (m, 2H). <sup>13</sup>C NMR (100 MHz, CDCl<sub>3</sub>) δ 159.3, 144.3, 142.1, 139.8, 135.2, 129.4, 129.3, 129.0, 123.6, 119.5, 113.4, 112.7, 55.2, 46.7, 21.6,

14.7. HRMS (ESI): calcd for C<sub>19</sub>H<sub>20</sub>O<sub>3</sub>S ([M+H]<sup>+</sup>) 329.1206, found 329.1218.

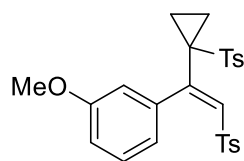

(*E*)-1-methoxy-3-(2-tosyl-1-(1-tosylcyclopropyl)vinyl)benzene (**5aca**)

White solid; m.p. 115-116 °C; yield: 8.0 mg (8%); <sup>1</sup>H NMR (400 MHz, CDCl<sub>3</sub>) δ 7.59 (d, *J* = 8.0 Hz, 2H), 7.39 (d, *J* = 8.0 Hz, 2H), 7.25 (d, *J* = 8.0 Hz, 2H), 7.19 (d, *J* = 8.0 Hz, 2H), 7.09 (t, *J* = 8.0 Hz, 1H), 6.89 (s, 1H), 6.82-6.79 (m, 1H), 6.39 (d, *J* = 7.6 Hz, 1H), 6.12 (s, 1H), 3.63 (s, 3H), 2.45 (s, 3H), 2.43 (s, 3H), 1.87-1.83 (m, 2H), 1.03-1.00 (m, 2H). <sup>13</sup>C NMR (100 MHz, CDCl<sub>3</sub>) δ 158.9, 148.0, 145.1, 144.3, 138.4, 137.6, 135.3, 135.2, 129.9, 129.4, 129.2, 128.9, 128.0, 121.2, 115.1, 113.1, 55.1, 48.1, 21.7, 21.6, 15.0. HRMS (ESI): calcd for C<sub>26</sub>H<sub>26</sub>O<sub>5</sub>S<sub>2</sub> ([M+Na]<sup>+</sup>) 505.1114, found 505.1116.

### III. Derivatization of product 3aa.

A stirred solution of β-Hydroxysulfones (0.2 mmol, 75.6 mg) and SnCl<sub>4</sub> (0.2 mmol, 52.1 mg) in CH<sub>2</sub>Cl<sub>2</sub> (1 mL) was refluxed for 1 h. After cooling to room temperature, the solution was washed with 10 % NaHCO<sub>3</sub> and with brine, dried (Na<sub>2</sub>SO<sub>4</sub>) and evaporated to remove the solvent. The residue was chromatographed on silica gel with acetic ether-light petroleum 1:5 as eluent.

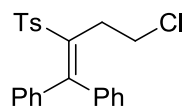

(4-Chloro-2-tosylbut-1-ene-1,1-diyl)dibenzene (**6aa**)

White solid; m.p. 149-150 °C; yield: 69.3 mg (88%); <sup>1</sup>H NMR (400 MHz, CDCl<sub>3</sub>) δ 7.33-7.27 (m, 5H), 7.19-7.15 (m, 1H), 7.11-7.03 (m, 6H), 6.95-6.93 (m, 2H), 3.82 (t, *J* = 7.2 Hz, 2H), 3.10 (t, *J* = 7.2 Hz, 2H), 2.34 (s, 3H). <sup>13</sup>C NMR (100 MHz, CDCl<sub>3</sub>) δ 155.1, 143.4, 140.7, 139.2, 138.9, 138.1, 129.1, 129.0, 128.7, 128.4, 128.0, 127.8, 127.7, 127.5, 43.1, 33.9, 21.5. HRMS (ESI): calcd for C<sub>23</sub>H<sub>21</sub>ClO<sub>2</sub>S ([M+Na]<sup>+</sup>) 419.0843, found 419.0861.

$\beta$ -Hydroxysulfones (0.2 mmol, 75.6 mg) and *p*-toluenesulfonic acid (0.2 mmol, 34.4 mg) in dry methylbenzene (2 mL) was refluxed for 1 h. After cooling to room temperature, the methylbenzene solution was washed with 10 % NaHCO<sub>3</sub> and with brine, dried (Na<sub>2</sub>SO<sub>4</sub>) and evaporated to remove the solvent. The mixture was chromatographed on silica gel with acetic ether-light petroleum 1:5 as eluent.

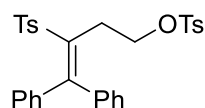

4,4-Diphenyl-3-tosylbut-3-en-1-yl 4-methylbenzenesulfonate (**7aa**)

White solid; m.p. 149-150 °C; yield: 90.2 mg (85%); <sup>1</sup>H NMR (400 MHz, CDCl<sub>3</sub>)  $\delta$  7.72 (d, *J* = 8.4 Hz, 2H), 7.32 (d, *J* = 8.0 Hz, 2H), 7.29-7.23 (m, 5H), 7.15-7.13 (m, 1H), 7.09-7.03 (m, 6H), 6.91-6.88 (m, 2H), 4.29 (t, *J* = 6.8 Hz, 2H), 2.96 (t, *J* = 6.8 Hz, 2H), 2.43 (s, 3H), 2.33 (s, 3H). <sup>13</sup>C NMR (100 MHz, CDCl<sub>3</sub>)  $\delta$  155.7, 144.8, 143.6, 140.5, 138.8, 137.9, 137.5, 132.9, 129.9, 129.2, 128.8, 128.7, 128.3, 128.0, 127.9, 127.7, 127.6, 127.5, 68.6, 30.4, 21.7, 21.6. HRMS (ESI): calcd for C<sub>30</sub>H<sub>28</sub>O<sub>5</sub>S<sub>2</sub> ([M+Na]<sup>+</sup>) 555.1270, found 555.1262.

#### IV. Control experiments.

MCPs (**1a**, 0.2 mmol, 41.2 mg), TsCl (**2a**, 0.3 mmol, 57.3 mg), diphenylethene (3.0 equiv., 108.0 mg), [Ru(bpy)<sub>3</sub>]Cl<sub>2</sub>•6H<sub>2</sub>O (2 mol%, 3.0 mg), and K<sub>2</sub>HPO<sub>4</sub> (1.5 equiv., 52.2 mg) was added in CH<sub>3</sub>CN:H<sub>2</sub>O=30:1 (1 mL) at room temperature and 12 W blue LEDs light irradiation for 3 h under N<sub>2</sub> atmosphere. After the reaction, CH<sub>3</sub>CN was removed under reduced pressure, purification was finally performed by flash column chromatography on silica gel using EtOAc and petroleum ether to give the product **8aa**.

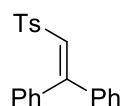

4,4'-(4,4-Diphenylbut-3-ene-1,3-diyl)bis(methylbenzene)<sup>12</sup> (**8aa**)

White solid; m.p. 97-98 °C; yield: 29.2 mg (29%); <sup>1</sup>H NMR (400 MHz, CDCl<sub>3</sub>)  $\delta$  7.47 (d, *J* = 8.4 Hz, 2H), 7.39-7.34 (m, 2H), 7.32-7.28 (m, 4H), 7.21-7.19 (m, 2H),

7.15 (d,  $J = 8.0$  Hz, 2H), 7.11-7.09 (m, 2H), 6.99 (s, 1H), 2.38 (s, 3H).  $^{13}\text{C}$  NMR (100 MHz,  $\text{CDCl}_3$ )  $\delta$  154.7, 143.8, 139.2, 138.6, 135.6, 130.2, 129.8, 129.3, 129.0, 128.8, 128.6, 128.2, 127.8, 127.7, 21.6.

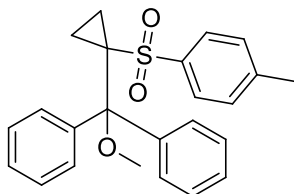

(Methoxy(1-tosylcyclopropyl)methylene)dibenzene (**9aaa**)

White solid; m.p. 115-116 °C; yield: 61.2 mg (78%);  $^1\text{H}$  NMR (400 MHz,  $\text{CDCl}_3$ )  $\delta$  7.45-7.43 (m, 4H), 7.33 (d,  $J = 8.0$  Hz, 2H), 7.31-7.28 (m, 6H), 7.09 (d,  $J = 8.4$  Hz, 2H), 2.84 (s, 3H), 2.37 (s, 3H), 1.74-1.71 (m, 2H), 1.26-1.21 (m, 2H).  $^{13}\text{C}$  NMR (100 MHz,  $\text{CDCl}_3$ )  $\delta$  142.7, 140.0, 138.6, 130.6, 128.7, 128.2, 128.0, 127.4, 84.6, 51.3, 50.8, 21.5, 13.4. HRMS (ESI): calcd for  $\text{C}_{24}\text{H}_{24}\text{O}_3\text{S}$  ( $[\text{M}+\text{Na}]^+$ ) 415.1338, found 415.1347.

**V. Crystal structure of 3aa.**

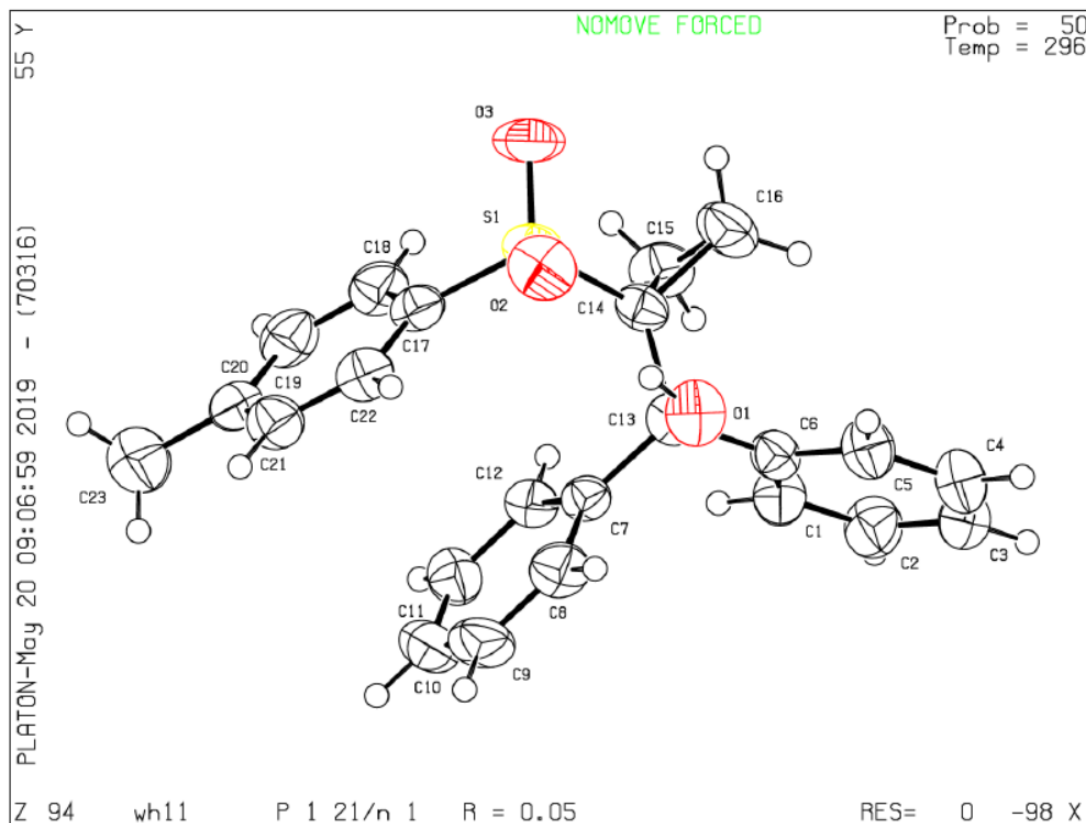



**Table 1. Single crystal data for wh11.**

|                        |                                                                                                        |
|------------------------|--------------------------------------------------------------------------------------------------------|
| Identification code    | wh11                                                                                                   |
| Chemical formula       | C <sub>23</sub> H <sub>22</sub> O <sub>3</sub> S                                                       |
| Formula weight         | 378.46 g/mol                                                                                           |
| Temperature            | 296(2) K                                                                                               |
| Wavelength             | 0.71073 Å                                                                                              |
| Crystal size           | 0.230 x 0.250 x 0.500 mm                                                                               |
| Crystal habit          | colorless block                                                                                        |
| Crystal system         | monoclinic                                                                                             |
| Space group            | P 1 21/n 1                                                                                             |
| Unit cell dimensions   | a = 11.3828(19) Å      α = 90°<br>b = 11.548(2) Å      β = 91.392(10)°<br>c = 14.490(3) Å      γ = 90° |
| Volume                 | 1904.1(6) Å <sup>3</sup>                                                                               |
| Z                      | 4                                                                                                      |
| Density (calculated)   | 1.320 g/cm <sup>3</sup>                                                                                |
| Absorption coefficient | 0.191 mm <sup>-1</sup>                                                                                 |
| F(000)                 | 800                                                                                                    |

**Table 2. Data collection and structure refinement for wh11.**

|                                     |                                          |
|-------------------------------------|------------------------------------------|
| Theta range for data collection     | 2.25 to 25.12°                           |
| Index ranges                        | -13 ≤ h ≤ 13, -13 ≤ k ≤ 13, -17 ≤ l ≤ 17 |
| Reflections collected               | 14632                                    |
| Independent reflections             | 3376 [R(int) = 0.0572]                   |
| Coverage of independent reflections | 99.1%                                    |
| Absorption correction               | Multi-Scan                               |

|                                   |                                                                           |
|-----------------------------------|---------------------------------------------------------------------------|
| Max. and min. transmission        | 0.9570 and 0.9110                                                         |
| Structure solution technique      | direct methods                                                            |
| Structure solution program        | SHELXT 2014/5 (Sheldrick, 2014)                                           |
| Refinement method                 | Full-matrix least-squares on F <sup>2</sup>                               |
| Refinement program                | SHELXL-2017/1 (Sheldrick, 2017)                                           |
| Function minimized                | $\Sigma w(F_o^2 - F_c^2)^2$                                               |
| Data / restraints / parameters    | 3376 / 0 / 246                                                            |
| Goodness-of-fit on F <sup>2</sup> | 1.032                                                                     |
| $\Delta/\sigma_{\max}$            | 0.001                                                                     |
| Final R indices                   | 2216 data; I>2 $\sigma$ (I) R1 = 0.0495, wR2 = 0.1031                     |
|                                   | all data R1 = 0.0940, wR2 = 0.1198                                        |
| Weighting scheme                  | $w=1/[\sigma^2(F_o^2)+(0.0517P)^2+0.4169P]$<br>where $P=(F_o^2+2F_c^2)/3$ |
| Largest diff. peak and hole       | 0.156 and -0.306 eÅ <sup>-3</sup>                                         |
| R.M.S. deviation from mean        | 0.044 eÅ <sup>-3</sup>                                                    |

**Table 3. Atomic coordinates and equivalent isotropic atomic displacement parameters (Å<sup>2</sup>) for wh11.**

U(eq) is defined as one third of the trace of the orthogonalized U<sub>ij</sub> tensor.

|    | x/a         | y/b         | z/c         | U(eq)     |
|----|-------------|-------------|-------------|-----------|
| S1 | 0.41686(5)  | 0.48660(5)  | 0.74423(5)  | 0.0505(2) |
| O1 | 0.58872(14) | 0.37657(15) | 0.59971(12) | 0.0564(5) |
| O2 | 0.53092(15) | 0.53685(14) | 0.72874(13) | 0.0628(5) |
| O3 | 0.31751(16) | 0.56300(15) | 0.74648(14) | 0.0713(6) |
| C1 | 0.3968(2)   | 0.1307(2)   | 0.54575(17) | 0.0527(7) |
| C2 | 0.3698(2)   | 0.0680(2)   | 0.4671(2)   | 0.0627(8) |
| C3 | 0.4097(3)   | 0.1019(3)   | 0.3828(2)   | 0.0672(8) |
| C4 | 0.4761(3)   | 0.2002(3)   | 0.37782(19) | 0.0681(8) |

|     |             |             |             |           |
|-----|-------------|-------------|-------------|-----------|
| C5  | 0.5018(2)   | 0.2644(2)   | 0.45578(18) | 0.0573(7) |
| C6  | 0.4625(2)   | 0.2312(2)   | 0.54149(16) | 0.0429(6) |
| C7  | 0.53381(18) | 0.22680(19) | 0.70753(15) | 0.0382(6) |
| C8  | 0.6525(2)   | 0.2125(2)   | 0.72775(18) | 0.0544(7) |
| C9  | 0.6908(2)   | 0.1425(3)   | 0.7998(2)   | 0.0643(8) |
| C10 | 0.6120(3)   | 0.0851(2)   | 0.8524(2)   | 0.0628(8) |
| C11 | 0.4941(2)   | 0.0975(2)   | 0.83318(18) | 0.0532(7) |
| C12 | 0.4553(2)   | 0.16772(19) | 0.76206(16) | 0.0414(6) |
| C13 | 0.49430(18) | 0.3043(2)   | 0.62727(16) | 0.0416(6) |
| C14 | 0.39026(19) | 0.38426(19) | 0.65369(16) | 0.0414(6) |
| C15 | 0.2641(2)   | 0.3480(2)   | 0.64254(19) | 0.0569(7) |
| C16 | 0.3123(2)   | 0.4339(3)   | 0.5776(2)   | 0.0643(8) |
| C17 | 0.4248(2)   | 0.41366(19) | 0.85034(17) | 0.0439(6) |
| C18 | 0.3244(2)   | 0.3723(2)   | 0.89066(19) | 0.0541(7) |
| C19 | 0.3334(2)   | 0.3138(2)   | 0.97301(19) | 0.0580(7) |
| C20 | 0.4413(2)   | 0.2977(2)   | 0.01762(17) | 0.0520(7) |
| C21 | 0.5398(2)   | 0.3421(2)   | 0.97685(18) | 0.0532(7) |
| C22 | 0.5328(2)   | 0.3993(2)   | 0.89399(18) | 0.0489(7) |
| C23 | 0.4498(3)   | 0.2330(3)   | 0.1075(2)   | 0.0790(9) |

**Table 4. Bond lengths (Å) for wh11.**

|        |            |        |            |
|--------|------------|--------|------------|
| S1-O3  | 1.4354(17) | S1-O2  | 1.4446(17) |
| S1-C17 | 1.754(3)   | S1-C14 | 1.786(2)   |
| O1-C13 | 1.425(2)   | O1-H1  | 0.82       |
| C1-C2  | 1.379(3)   | C1-C6  | 1.383(3)   |
| C1-H1A | 0.93       | C2-C3  | 1.370(4)   |
| C2-H2  | 0.93       | C3-C4  | 1.367(4)   |
| C3-H3  | 0.93       | C4-C5  | 1.377(4)   |
| C4-H4  | 0.93       | C5-C6  | 1.384(3)   |
| C5-H5  | 0.93       | C6-C13 | 1.538(3)   |
| C7-C8  | 1.385(3)   | C7-C12 | 1.387(3)   |
| C7-C13 | 1.527(3)   | C8-C9  | 1.383(4)   |

|          |          |          |          |
|----------|----------|----------|----------|
| C8-H8    | 0.93     | C9-C10   | 1.363(4) |
| C9-H9    | 0.93     | C10-C11  | 1.371(3) |
| C10-H10  | 0.93     | C11-C12  | 1.376(3) |
| C11-H11  | 0.93     | C12-H12  | 0.93     |
| C13-C14  | 1.557(3) | C14-C15  | 1.501(3) |
| C14-C16  | 1.511(3) | C15-C16  | 1.482(4) |
| C15-H15A | 0.97     | C15-H15B | 0.97     |
| C16-H16A | 0.97     | C16-H16B | 0.97     |
| C17-C22  | 1.379(3) | C17-C18  | 1.381(3) |
| C18-C19  | 1.373(4) | C18-H18  | 0.93     |
| C19-C20  | 1.386(3) | C19-H19  | 0.93     |
| C20-C21  | 1.379(3) | C20-C23  | 1.502(4) |
| C21-C22  | 1.371(3) | C21-H21  | 0.93     |
| C22-H22  | 0.93     | C23-H23A | 0.96     |
| C23-H23B | 0.96     | C23-H23C | 0.96     |

**Table 5. Bond angles (°) for wh11.**

|           |            |            |            |
|-----------|------------|------------|------------|
| O3-S1-O2  | 117.92(12) | O3-S1-C17  | 107.39(12) |
| O2-S1-C17 | 107.58(11) | O3-S1-C14  | 107.69(11) |
| O2-S1-C14 | 106.78(11) | C17-S1-C14 | 109.29(11) |
| C13-O1-H1 | 109.5      | C2-C1-C6   | 120.9(3)   |
| C2-C1-H1A | 119.5      | C6-C1-H1A  | 119.5      |
| C3-C2-C1  | 121.0(3)   | C3-C2-H2   | 119.5      |
| C1-C2-H2  | 119.5      | C4-C3-C2   | 118.7(3)   |
| C4-C3-H3  | 120.7      | C2-C3-H3   | 120.7      |
| C3-C4-C5  | 120.7(3)   | C3-C4-H4   | 119.6      |

|               |            |              |            |
|---------------|------------|--------------|------------|
| C5-C4-H4      | 119.6      | C4-C5-C6     | 121.4(3)   |
| C4-C5-H5      | 119.3      | C6-C5-H5     | 119.3      |
| C1-C6-C5      | 117.3(2)   | C1-C6-C13    | 122.8(2)   |
| C5-C6-C13     | 119.9(2)   | C8-C7-C12    | 117.4(2)   |
| C8-C7-C13     | 119.9(2)   | C12-C7-C13   | 122.71(19) |
| C9-C8-C7      | 121.1(3)   | C9-C8-H8     | 119.4      |
| C7-C8-H8      | 119.4      | C10-C9-C8    | 120.5(2)   |
| C10-C9-H9     | 119.8      | C8-C9-H9     | 119.8      |
| C9-C10-C11    | 119.3(3)   | C9-C10-H10   | 120.4      |
| C11-C10-H10   | 120.4      | C10-C11-C12  | 120.6(3)   |
| C10-C11-H11   | 119.7      | C12-C11-H11  | 119.7      |
| C11-C12-C7    | 121.1(2)   | C11-C12-H12  | 119.4      |
| C7-C12-H12    | 119.4      | O1-C13-C7    | 110.27(18) |
| O1-C13-C6     | 105.00(18) | C7-C13-C6    | 110.67(19) |
| O1-C13-C14    | 107.76(18) | C7-C13-C14   | 111.85(18) |
| C6-C13-C14    | 111.03(18) | C15-C14-C16  | 58.96(16)  |
| C15-C14-C13   | 122.7(2)   | C16-C14-C13  | 118.8(2)   |
| C15-C14-S1    | 114.10(18) | C16-C14-S1   | 111.75(18) |
| C13-C14-S1    | 117.17(15) | C16-C15-C14  | 60.86(16)  |
| C16-C15-H15A  | 117.7      | C14-C15-H15A | 117.7      |
| C16-C15-H15B  | 117.7      | C14-C15-H15B | 117.7      |
| H15A-C15-H15B | 114.8      | C15-C16-C14  | 60.18(16)  |
| C15-C16-H16A  | 117.8      | C14-C16-H16A | 117.8      |
| C15-C16-H16B  | 117.8      | C14-C16-H16B | 117.8      |
| H16A-C16-H16B | 114.9      | C22-C17-C18  | 120.1(2)   |
| C22-C17-S1    | 119.1(2)   | C18-C17-S1   | 120.78(19) |

|               |          |               |          |
|---------------|----------|---------------|----------|
| C19-C18-C17   | 119.5(2) | C19-C18-H18   | 120.3    |
| C17-C18-H18   | 120.3    | C18-C19-C20   | 121.2(3) |
| C18-C19-H19   | 119.4    | C20-C19-H19   | 119.4    |
| C21-C20-C19   | 118.1(3) | C21-C20-C23   | 121.4(2) |
| C19-C20-C23   | 120.6(3) | C22-C21-C20   | 121.6(2) |
| C22-C21-H21   | 119.2    | C20-C21-H21   | 119.2    |
| C21-C22-C17   | 119.5(2) | C21-C22-H22   | 120.3    |
| C17-C22-H22   | 120.3    | C20-C23-H23A  | 109.5    |
| C20-C23-H23B  | 109.5    | H23A-C23-H23B | 109.5    |
| C20-C23-H23C  | 109.5    | H23A-C23-H23C | 109.5    |
| H23B-C23-H23C | 109.5    |               |          |

**Table 6. Anisotropic atomic displacement parameters ( $\text{\AA}^2$ ) for wh11.**

The anisotropic atomic displacement factor exponent takes the form:  $-2 \pi^2 [ h^2 a^{*2} U_{11} + \dots + 2 h k a^* b^* U_{12} ]$

|     | U11        | U22        | U33        | U23         | U13         | U12         |
|-----|------------|------------|------------|-------------|-------------|-------------|
| S1  | 0.0475(4)  | 0.0385(4)  | 0.0651(5)  | -0.0010(3)  | -0.0070(3)  | 0.0020(3)   |
| O1  | 0.0472(10) | 0.0616(12) | 0.0608(12) | 0.0057(9)   | 0.0095(9)   | -0.0197(9)  |
| O2  | 0.0580(11) | 0.0496(11) | 0.0805(14) | 0.0039(9)   | -0.0043(10) | -0.0216(9)  |
| O3  | 0.0704(13) | 0.0495(11) | 0.0934(15) | -0.0052(10) | -0.0119(11) | 0.0257(10)  |
| C1  | 0.0582(17) | 0.0527(16) | 0.0472(16) | -0.0001(13) | 0.0008(13)  | -0.0057(14) |
| C2  | 0.075(2)   | 0.0539(17) | 0.059(2)   | -0.0053(15) | -0.0047(15) | -0.0062(15) |
| C3  | 0.086(2)   | 0.065(2)   | 0.0498(19) | -0.0106(15) | -0.0107(16) | 0.0149(18)  |
| C4  | 0.085(2)   | 0.076(2)   | 0.0439(18) | 0.0092(16)  | 0.0011(15)  | 0.0083(18)  |
| C5  | 0.0625(17) | 0.0604(17) | 0.0490(17) | 0.0077(15)  | 0.0025(14)  | -0.0035(14) |
| C6  | 0.0393(13) | 0.0473(15) | 0.0420(15) | 0.0042(12)  | -0.0002(11) | 0.0012(12)  |
| C7  | 0.0307(13) | 0.0399(13) | 0.0438(14) | -0.0041(11) | -0.0016(11) | 0.0016(11)  |
| C8  | 0.0334(14) | 0.0666(17) | 0.0632(18) | -0.0026(15) | 0.0027(12)  | 0.0027(13)  |
| C9  | 0.0435(16) | 0.0680(19) | 0.080(2)   | -0.0050(17) | -0.0170(15) | 0.0179(15)  |
| C10 | 0.074(2)   | 0.0483(16) | 0.065(2)   | 0.0020(14)  | -0.0226(16) | 0.0097(15)  |
| C11 | 0.0654(18) | 0.0416(14) | 0.0523(16) | 0.0035(13)  | -0.0046(14) | -0.0079(13) |

|     |            |            |            |             |             |             |
|-----|------------|------------|------------|-------------|-------------|-------------|
| C12 | 0.0352(13) | 0.0389(13) | 0.0499(15) | 0.0005(12)  | -0.0022(11) | -0.0024(11) |
| C13 | 0.0313(13) | 0.0449(14) | 0.0487(15) | 0.0051(12)  | 0.0049(11)  | -0.0080(11) |
| C14 | 0.0344(13) | 0.0397(13) | 0.0498(15) | 0.0034(11)  | -0.0068(11) | -0.0007(11) |
| C15 | 0.0334(14) | 0.0610(17) | 0.0759(19) | -0.0069(15) | -0.0073(13) | -0.0020(13) |
| C16 | 0.0575(17) | 0.0695(19) | 0.0649(19) | 0.0062(16)  | -0.0188(14) | 0.0128(15)  |
| C17 | 0.0385(14) | 0.0400(14) | 0.0529(15) | -0.0099(12) | -0.0026(12) | 0.0034(11)  |
| C18 | 0.0328(14) | 0.0681(18) | 0.0615(18) | -0.0095(15) | 0.0006(12)  | 0.0059(13)  |
| C19 | 0.0479(16) | 0.0673(18) | 0.0593(18) | -0.0075(15) | 0.0132(14)  | 0.0022(14)  |
| C20 | 0.0536(17) | 0.0508(16) | 0.0516(17) | -0.0079(13) | 0.0018(14)  | 0.0110(14)  |
| C21 | 0.0416(16) | 0.0585(17) | 0.0589(18) | -0.0061(14) | -0.0075(13) | 0.0029(13)  |
| C22 | 0.0390(14) | 0.0484(15) | 0.0593(18) | -0.0072(13) | -0.0018(12) | -0.0043(12) |
| C23 | 0.087(2)   | 0.082(2)   | 0.069(2)   | 0.0086(18)  | 0.0042(17)  | 0.0098(18)  |

**Table 7. Hydrogen atomic coordinates and isotropic atomic displacement parameters ( $\text{\AA}^2$ ) for wh11.**

|      | x/a    | y/b    | z/c    | U(eq) |
|------|--------|--------|--------|-------|
| H1   | 0.5961 | 0.4308 | 0.6360 | 0.085 |
| H1A  | 0.3705 | 0.1051 | 0.6025 | 0.063 |
| H2   | 0.3239 | 0.0017 | 0.4714 | 0.075 |
| H3   | 0.3919 | 0.0588 | 0.3301 | 0.081 |
| H4   | 0.5043 | 0.2239 | 0.3212 | 0.082 |
| H5   | 0.5464 | 0.3315 | 0.4507 | 0.069 |
| H8   | 0.7074 | 0.2507 | 0.6923 | 0.065 |
| H9   | 0.7708 | 0.1345 | 0.8125 | 0.077 |
| H10  | 0.6379 | 0.0379 | 0.9008 | 0.075 |
| H11  | 0.4399 | 0.0582 | 0.8686 | 0.064 |
| H12  | 0.3750 | 0.1757 | 0.7503 | 0.05  |
| H15A | 0.2482 | 0.2707 | 0.6193 | 0.068 |
| H15B | 0.2093 | 0.3755 | 0.6879 | 0.068 |
| H16A | 0.2872 | 0.5138 | 0.5835 | 0.077 |
| H16B | 0.3260 | 0.4089 | 0.5149 | 0.077 |
| H18  | 0.2512 | 0.3841 | 0.8622 | 0.065 |
| H19  | 0.2660 | 0.2844 | 0.9993 | 0.07  |
| H21  | 0.6128 | 0.3330 | 1.0063 | 0.064 |
| H22  | 0.6003 | 0.4281 | 0.8674 | 0.059 |
| H23A | 0.5185 | 0.1849 | 1.1083 | 0.119 |

|      |        |        |        |       |
|------|--------|--------|--------|-------|
| H23B | 0.3812 | 0.1856 | 1.1140 | 0.119 |
| H23C | 0.4550 | 0.2872 | 1.1576 | 0.119 |

**Table 8. Hydrogen bond parameters (Å, °) for compound 3aa.**

| D–H···A             | D(D)···H) | d(H)···A) | d(D)···A) | ∠(DHA) | Symmetry transformation for A |
|---------------------|-----------|-----------|-----------|--------|-------------------------------|
| O(1)–H(1)···O(2)    | 0.82      | 1.98      | 2.7229(6) | 151    | x,y,z                         |
| C(5)–H(5)···O(1)    | 0.93      | 2.26      | 2.6279(5) | 103    | x,y,z                         |
| C(8)–H(8)···O(1)    | 0.93      | 2.38      | 2.7370(6) | 103    | x,y,z                         |
| C(12)–H(12)···O(3)  | 0.93      | 2.55      | 3.3316(7) | 142    | 3/2-x,1/2-y,1/2-z             |
| C(16)–H(16A)···O(3) | 0.97      | 2.44      | 2.8645(6) | 106    | x,y,z                         |
| C(22)–H(22)···O(2)  | 0.93      | 2.48      | 2.8733(6) | 105    | x,y,z                         |

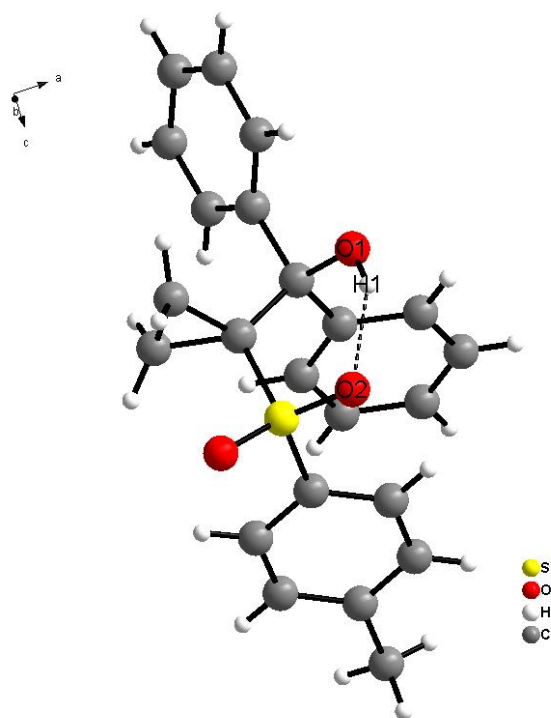

## References

1. M. Shi, B.-Y. Wang, J.-W. Huang, *J. Org. Chem.* **2005**, *70*, 5606-5610.
2. W.-D. Liu, G.-Q. Xu, X.-Q. Hu, P.-F. Xu, *Org. Lett.* **2017**, *19*, 6288-6291.
3. H.-C. Jiang, X.-Y. Tang, M. Shi, *Chem. Commun.* **2016**, *52*, 5273-5276.



4. Y. Liu, Q. L. Wang, C. S. Zhou, B. Q. Xiong, P. L. Zhang, C. A. Yang, K. W. Tang, *J. Org. Chem.* **2017**, *82*, 7394-7401.
5. M. Shi, L.-P. Liu, J. Tang, *Org. Lett.* **2006**, *18*, 4043-4046.
6. A. Schweinitz, A. Chtchemelinine, A. Orellana, *Org. Lett.* **2011**, *13*, 232-235.
7. Z. Z. Zhu, K. Chen, L. Yu, Z. L. X. Y. Tang, M. Shi, *Org. Lett.* **2015**, *17*, 5994-5997.
8. Y. Liu, Q.-L. Wang, Z. Chen, Q. Zhou, H. Li, C.-S. Zhou, B. Xiong, P.-L. Zhang, K.-W. Tang, *J. Org. Chem.* **2019**, *84*, 5, 2829-2839.
9. T. Matsuda, T. Tsuboi, M. Murakami, *J. Am. Chem. Soc.* **2007**, *129*, 42, 12596-12597.
10. W.-D. Liu, G.-Q. Xu, X.-Q. Hu, P.-F. Xu, *Org. Lett.* **2017**, *19*, 23, 6288-6291.
11. N. Hideo, T. Eiki, I. Masataka, *Org. Lett.* **1999**, *13*, 517-520.
12. (a) J.-M. Li, Y.-H. Wang, Y. Yu, R. Wu, J. Weng, G. Lu, *ACS Catal.* **2017**, *7*, 4, 2661-2667; (b) J. Yan, J. Xu, Y. Zhou, J. Chen, Q. Song, *Org. Chem. Front.* **2018**, *5*, 1483-1487.

## VI. NMR Spectra

$^1\text{H}$  NMR and  $^{13}\text{C}$  NMR spectra of compound **3aa**

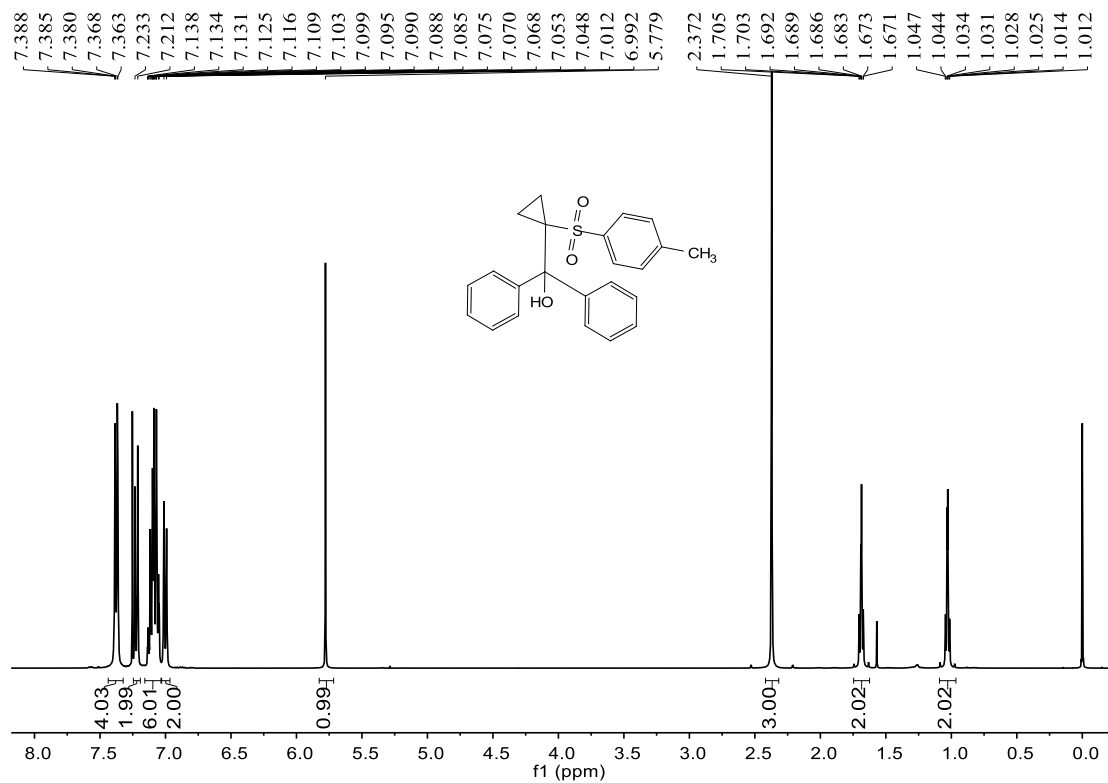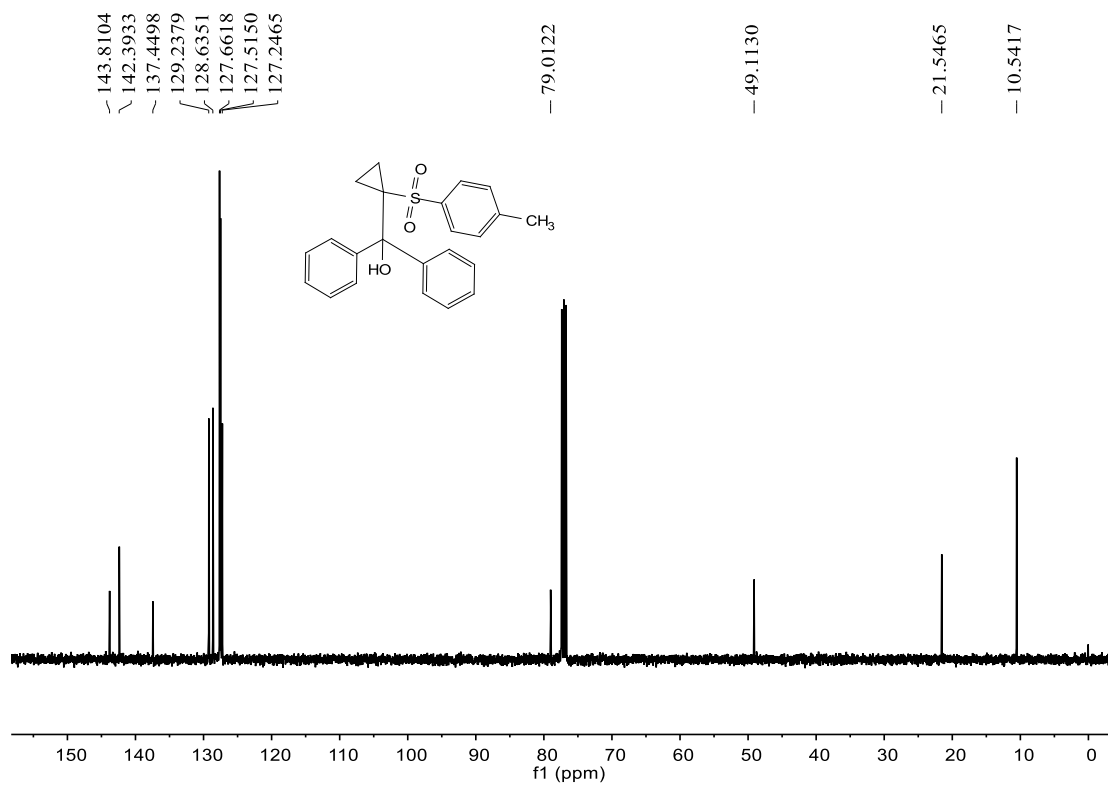

$^1\text{H}$  NMR and  $^{13}\text{C}$  NMR spectra of compound **3ba**

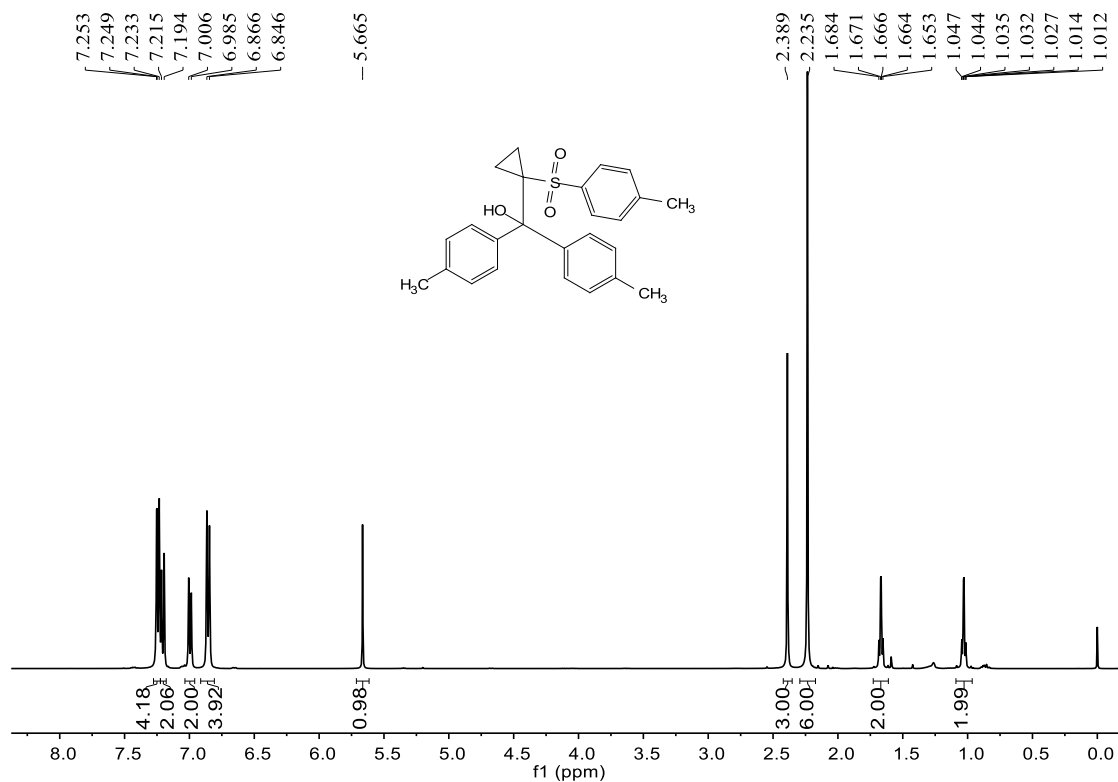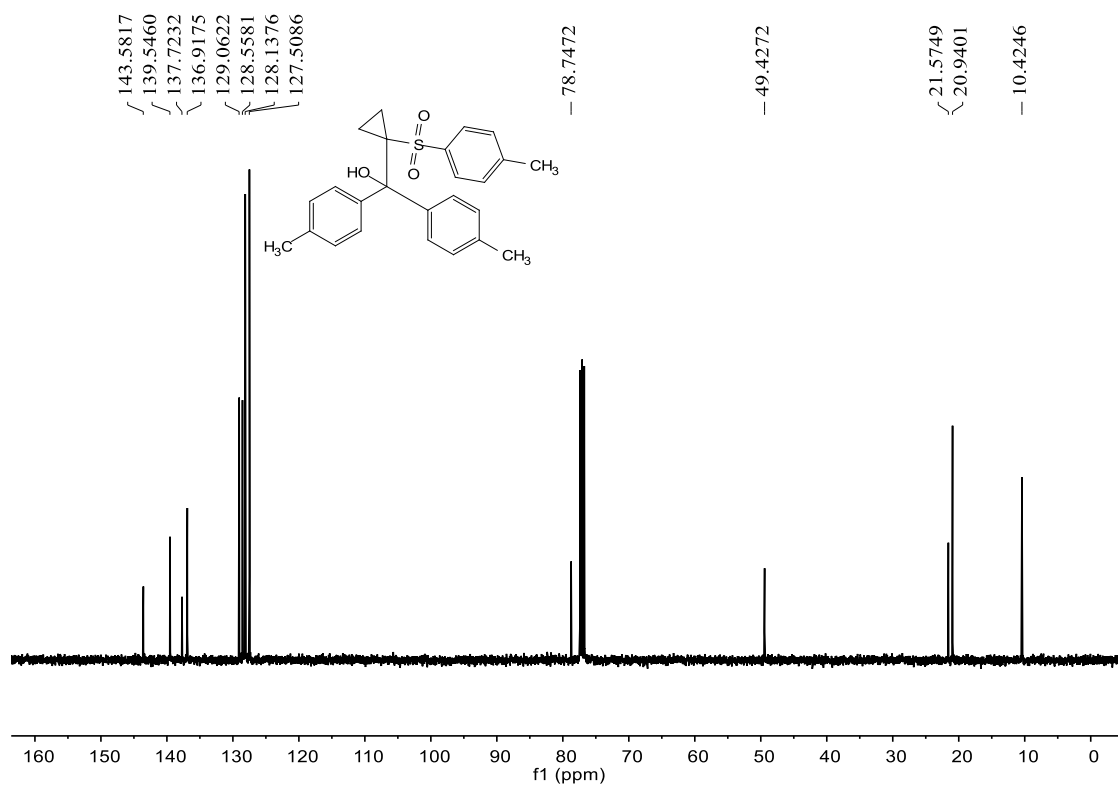

<sup>1</sup>H NMR and <sup>13</sup>C NMR spectra of compound **3ca**

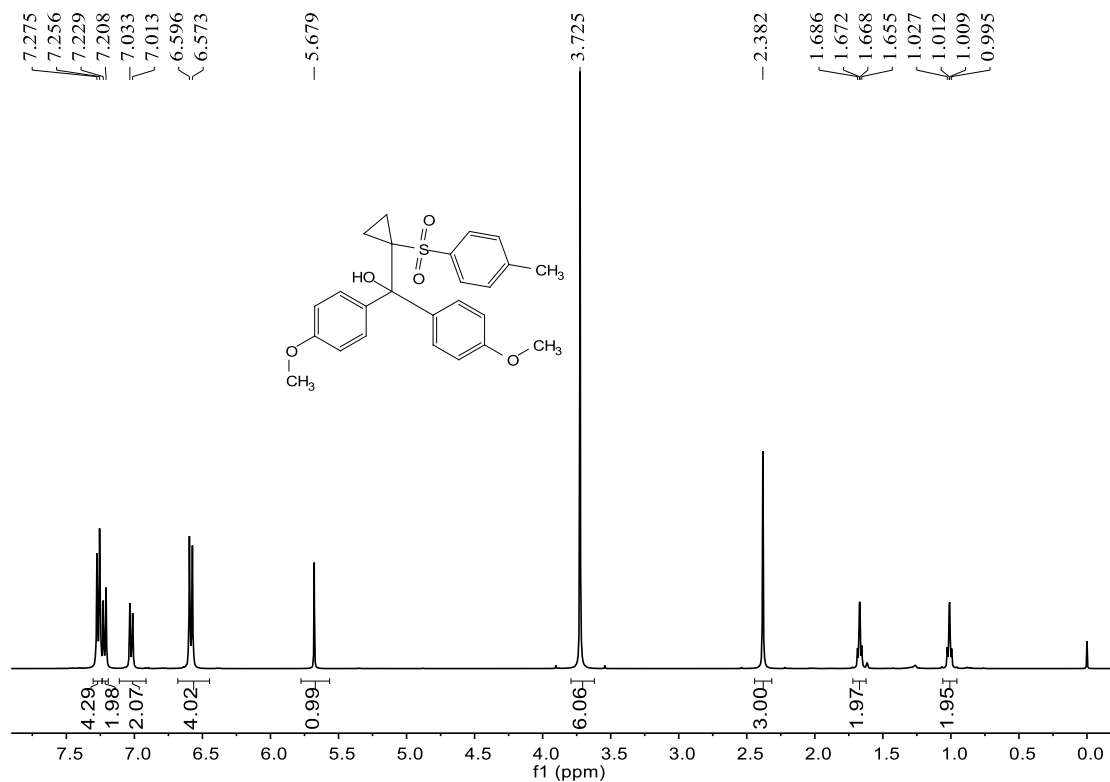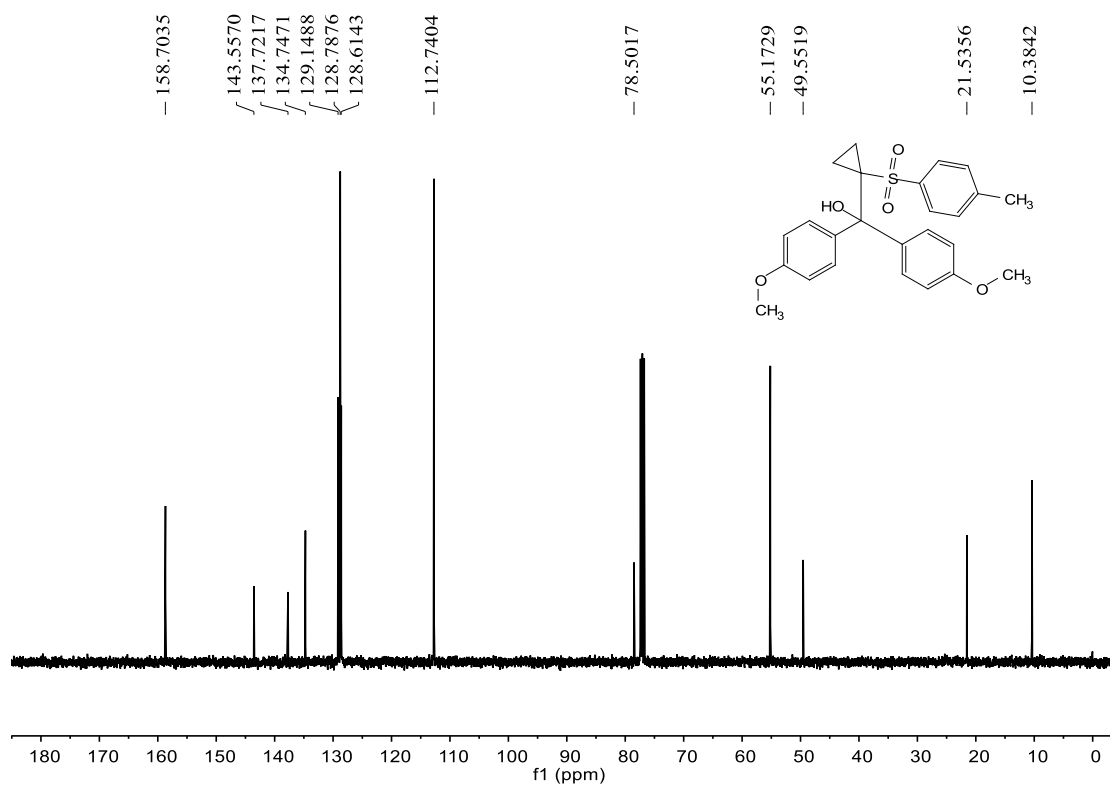

$^1\text{H}$  NMR and  $^{13}\text{C}$  NMR spectra of compound **3da**

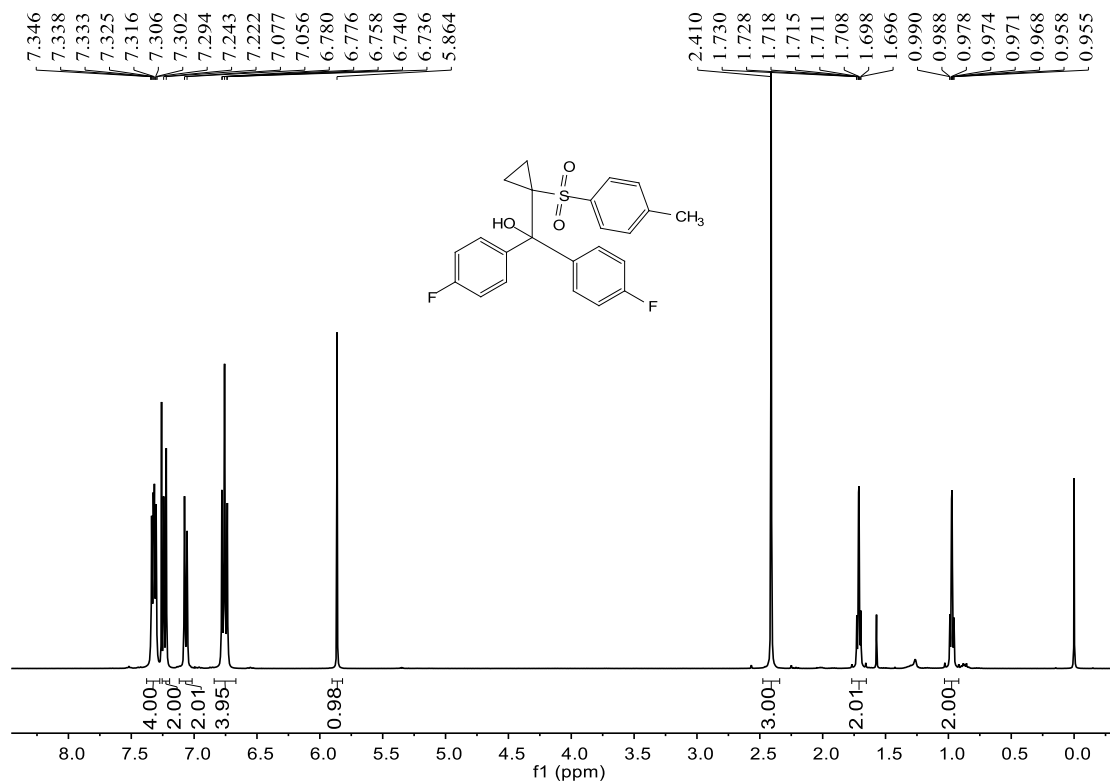

$\sim$  163.2782  
 $\sim$  160.8193  
 144.3277  
 138.0658  
 138.0337  
 137.2854  
 129.3933  
 129.3204  
 128.5983  
 114.4616  
 114.2499  
 -78.3929  
 -49.0942  
 -21.5134  
 -10.3629

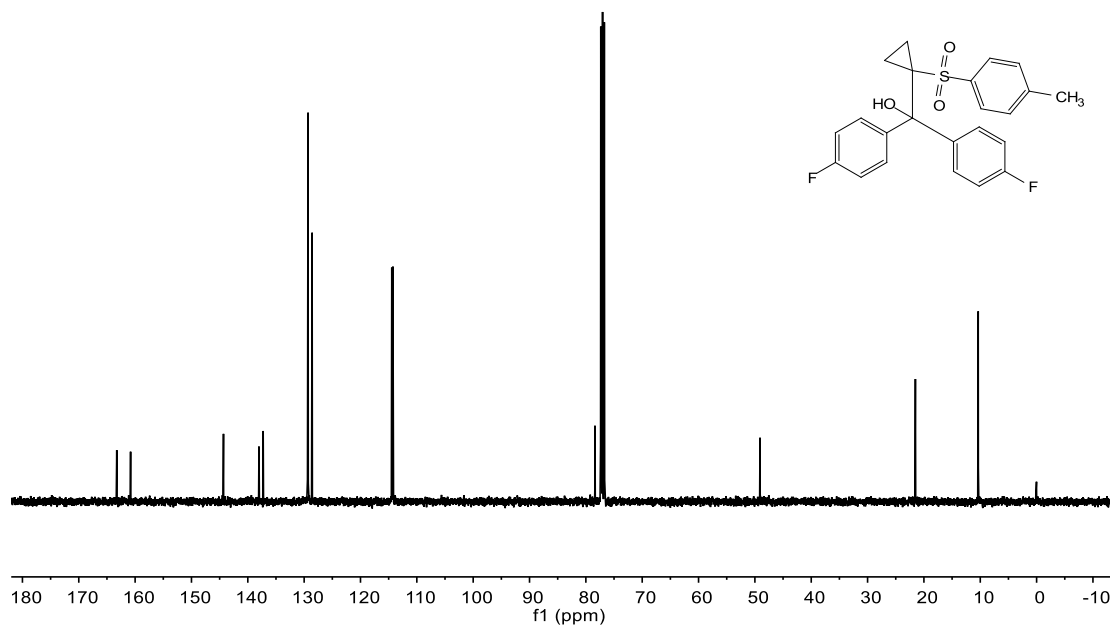

$^1\text{H}$  NMR and  $^{13}\text{C}$  NMR spectra of compound **3ea**

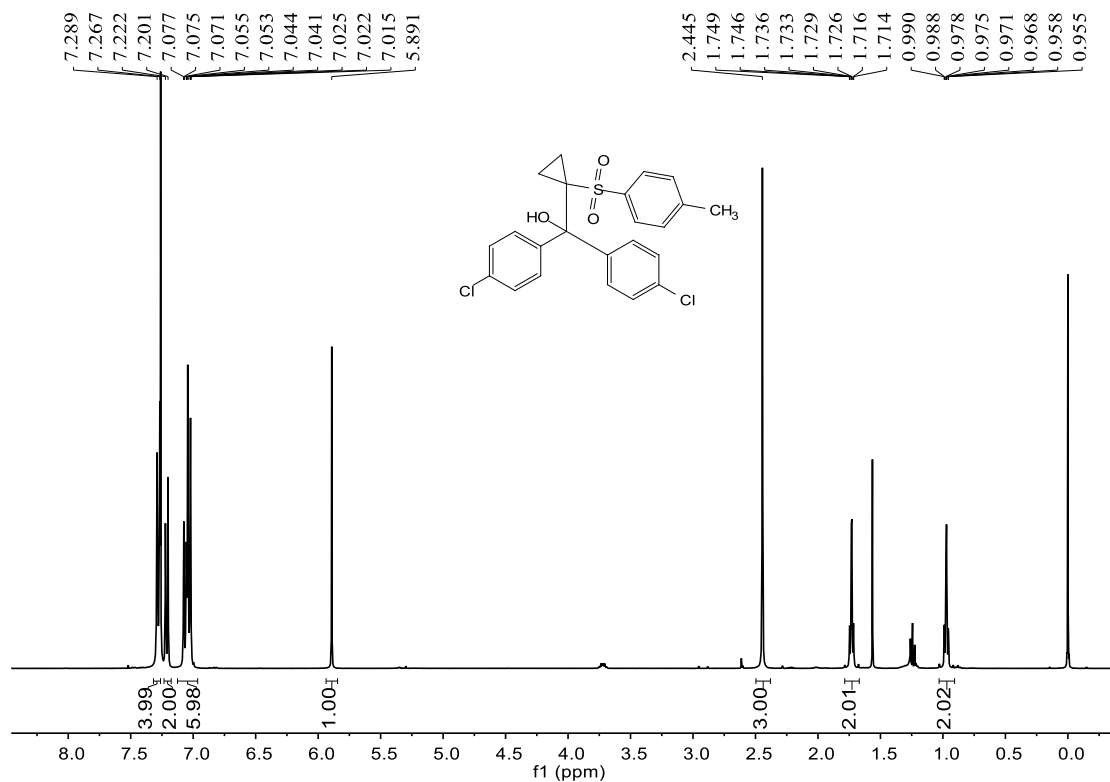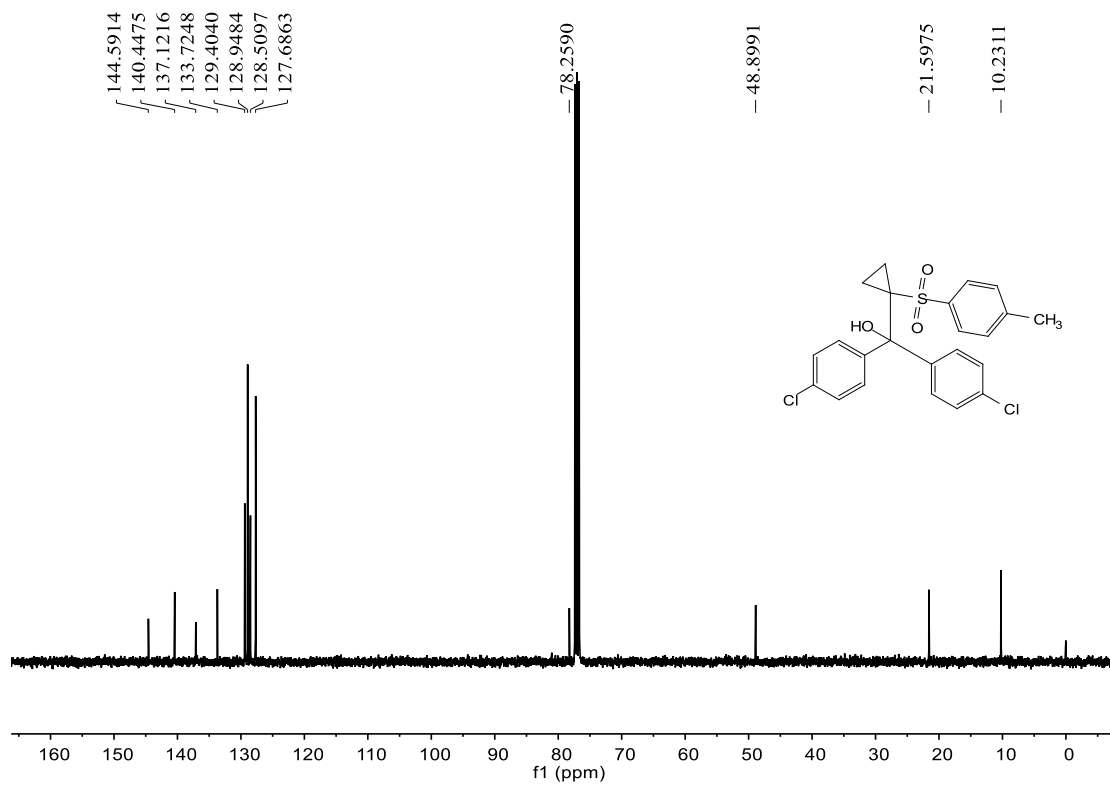

<sup>1</sup>H NMR and <sup>13</sup>C NMR spectra of compound **3fa**

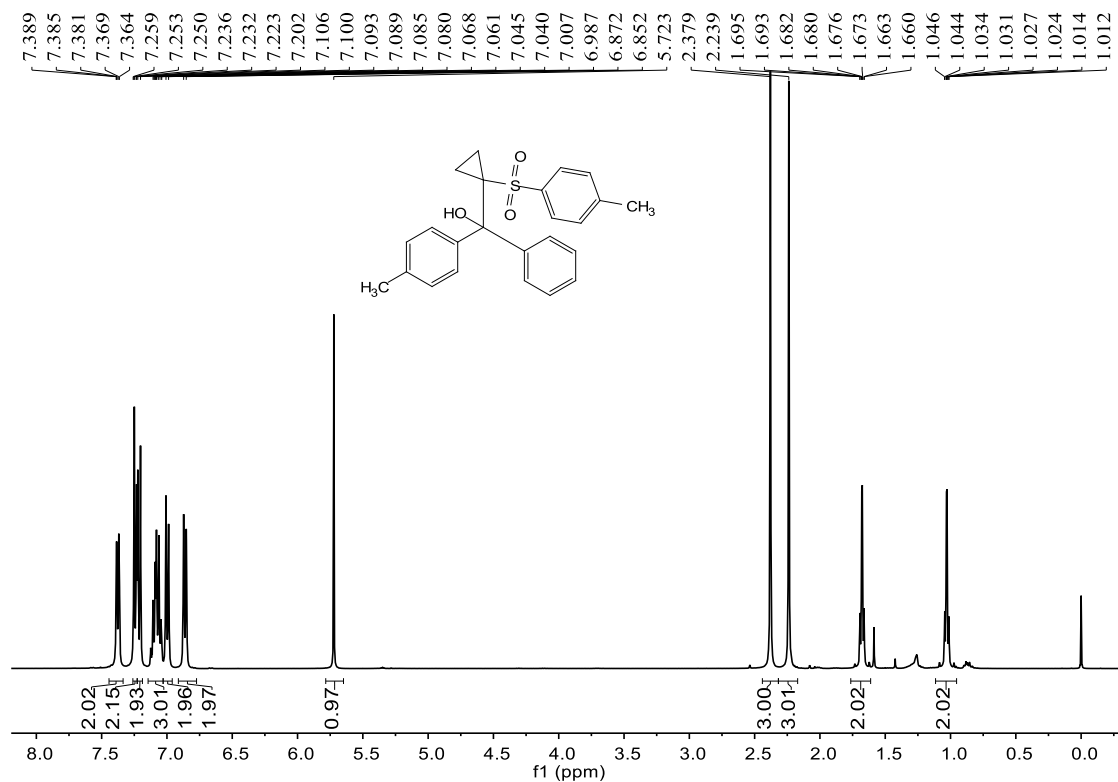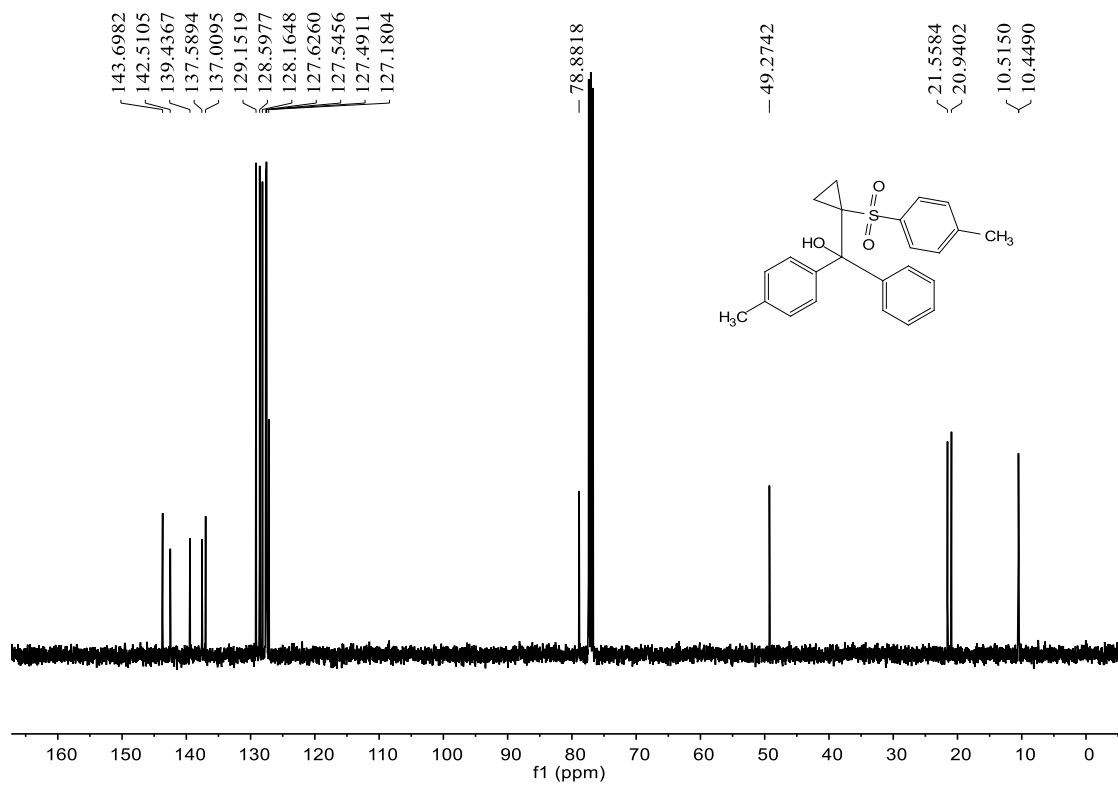

<sup>1</sup>H NMR and <sup>13</sup>C NMR spectra of compound **3ga**

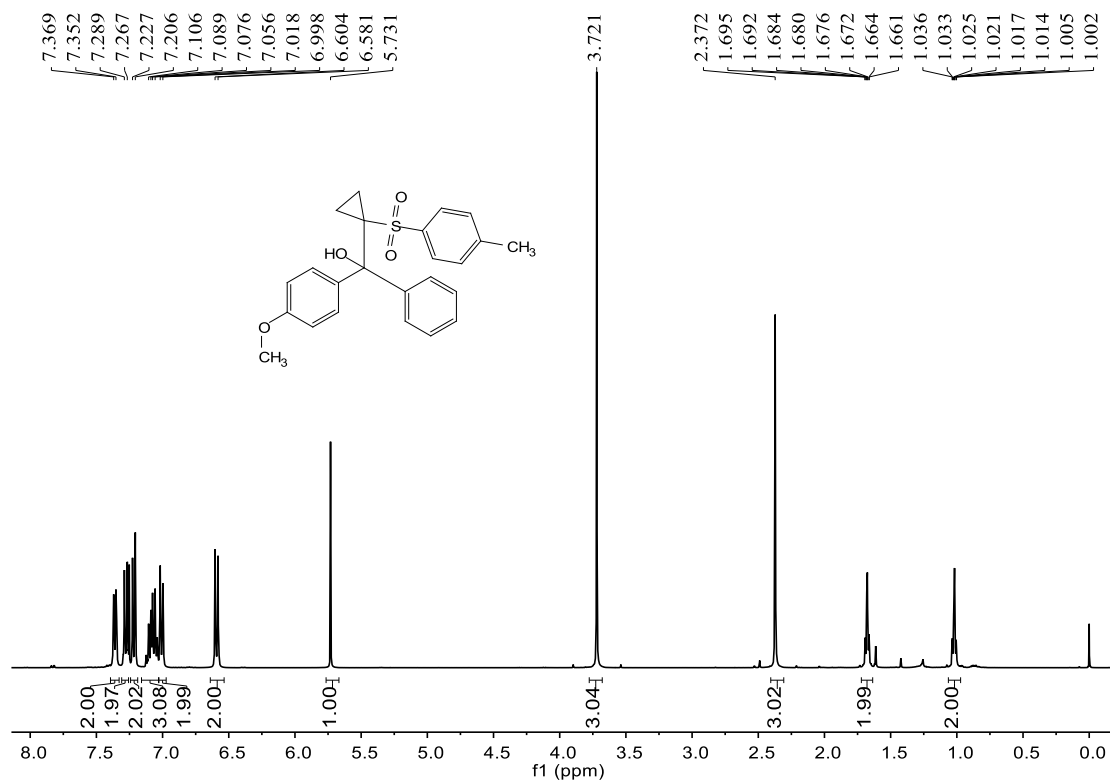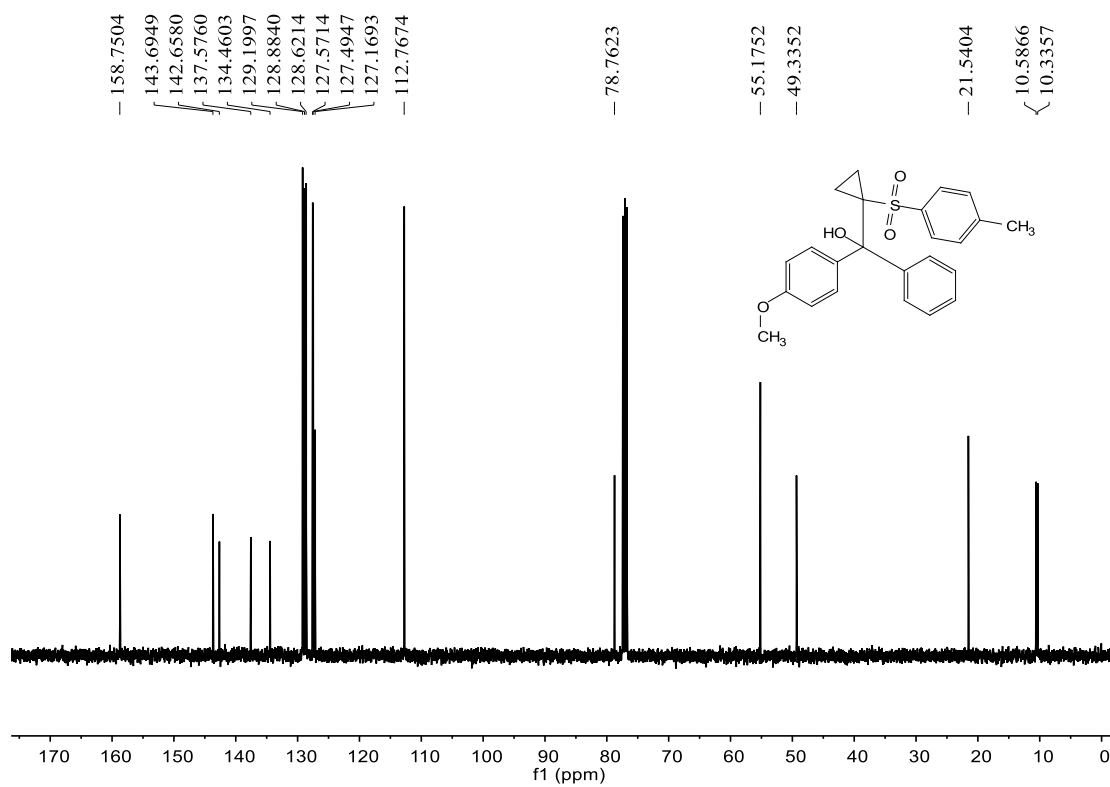



<sup>1</sup>H NMR and <sup>13</sup>C NMR spectra of compound **3ha**

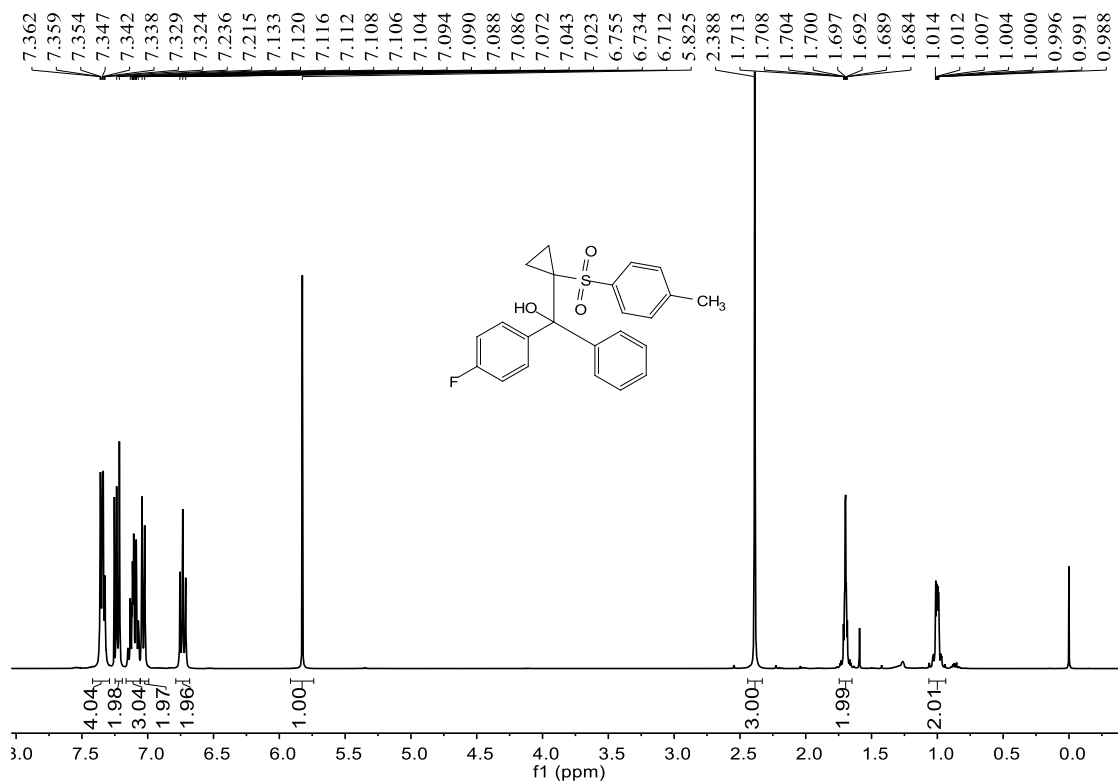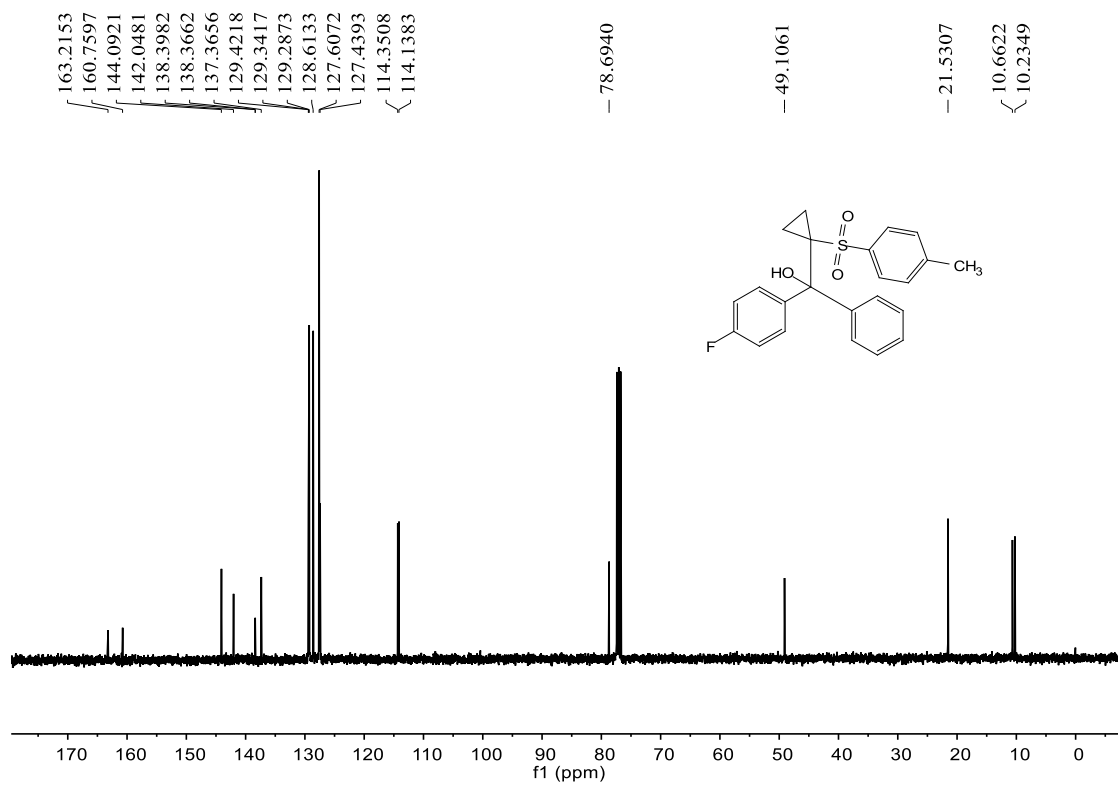

<sup>1</sup>H NMR and <sup>13</sup>C NMR spectra of compound **3ia**

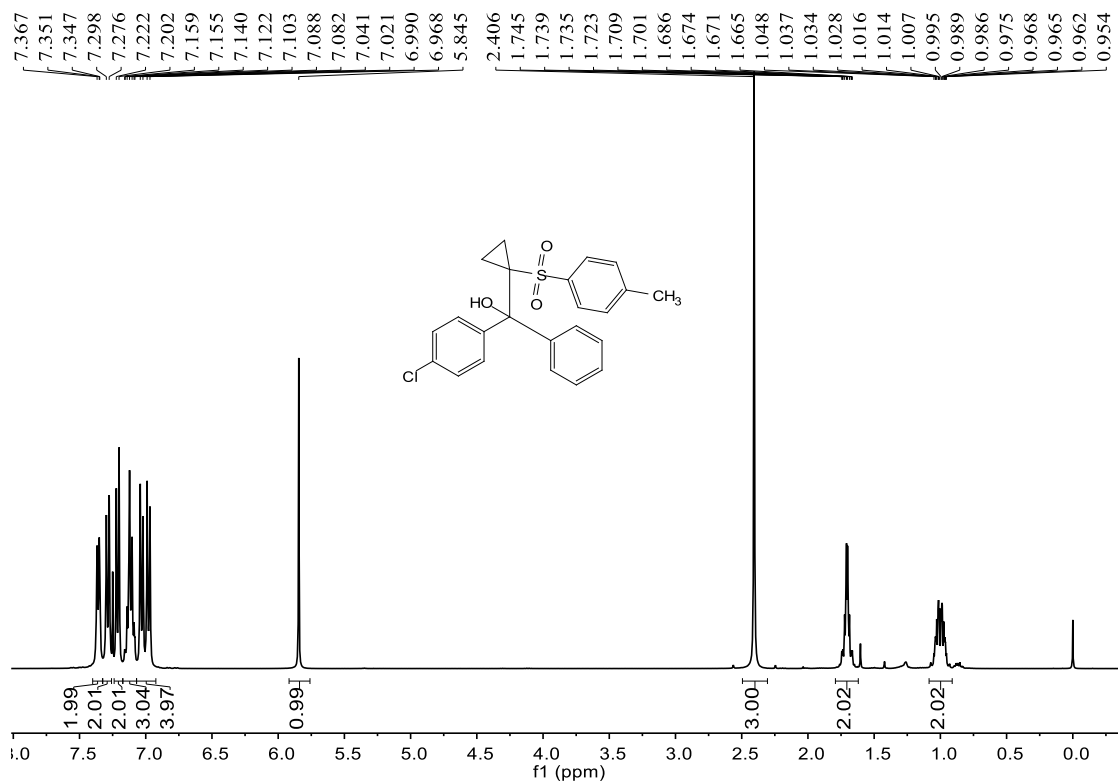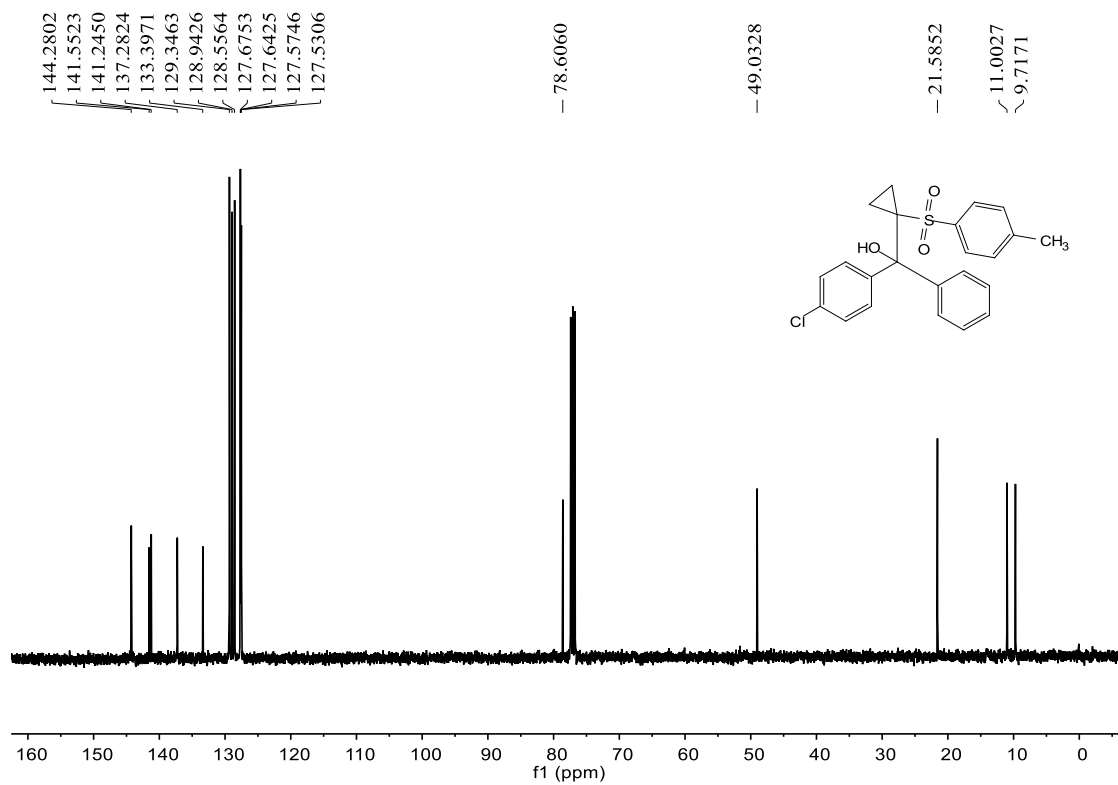

<sup>1</sup>H NMR and <sup>13</sup>C NMR spectra of compound **3ja**

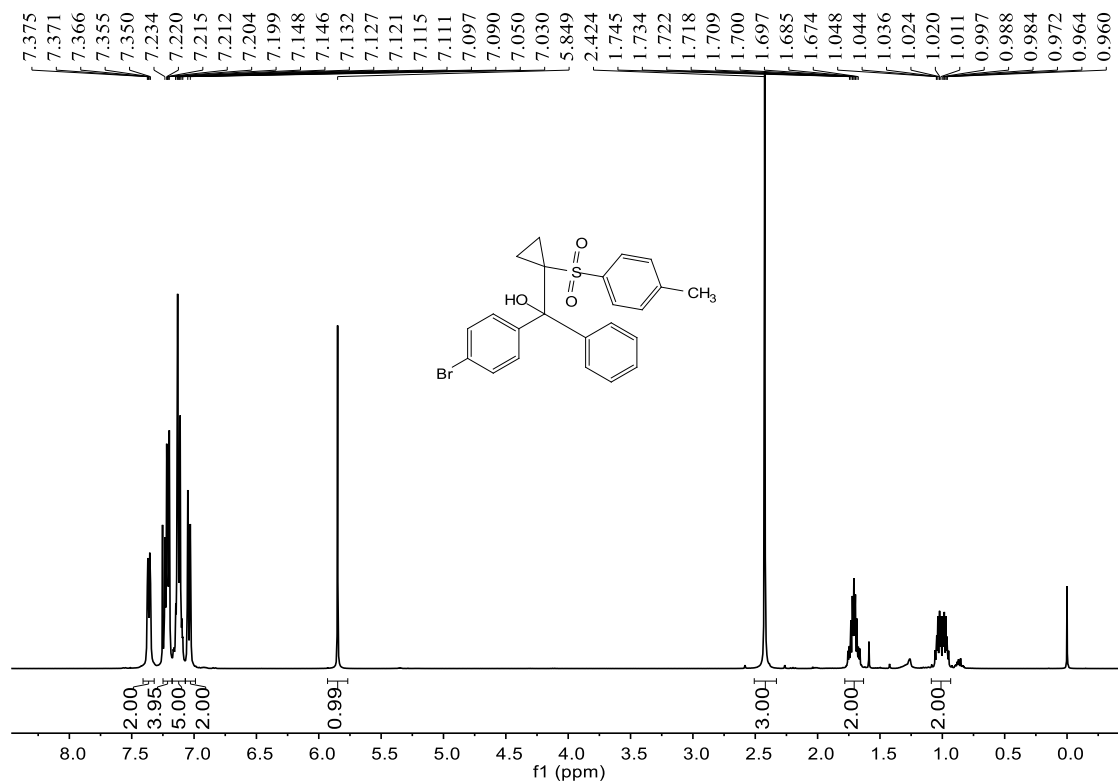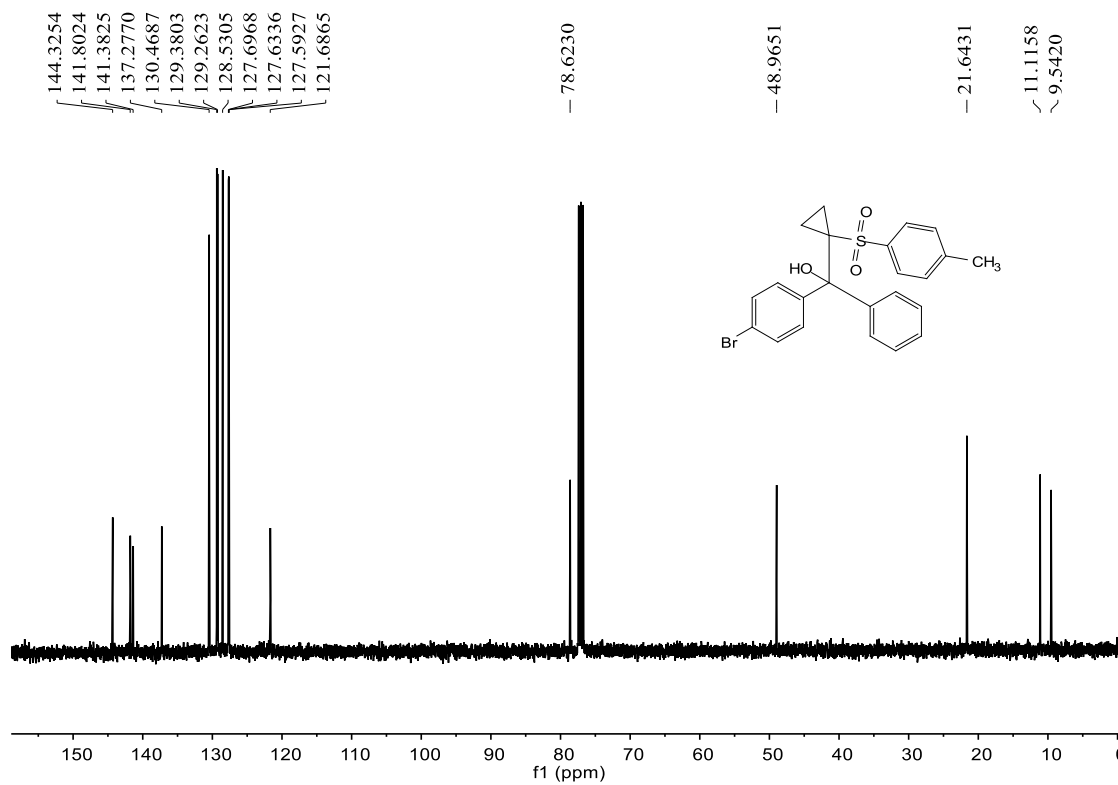

$^1\text{H}$  NMR and  $^{13}\text{C}$  NMR spectra of compound **3ka**

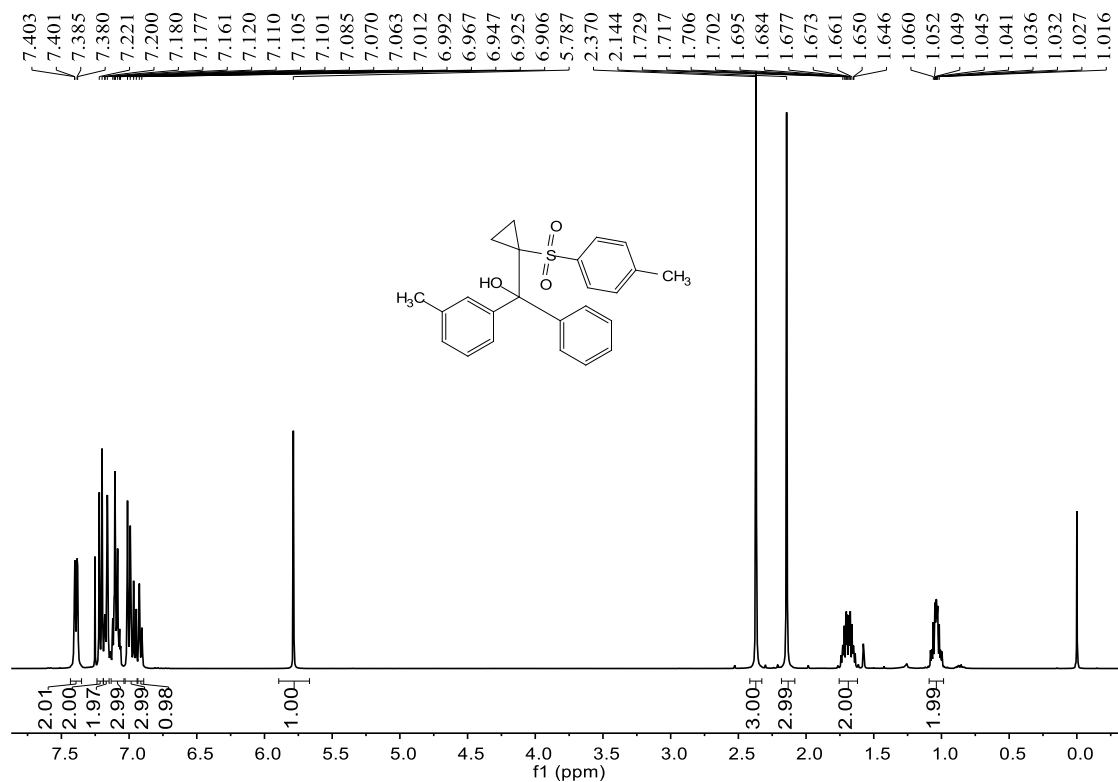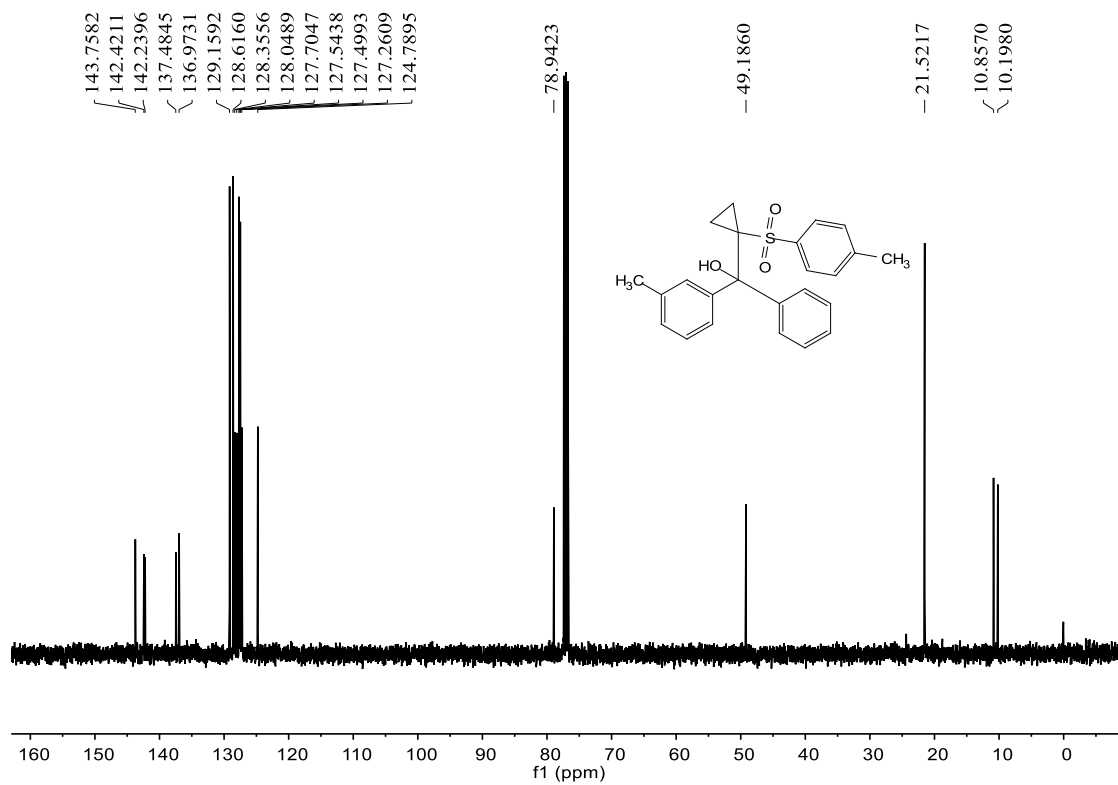

$^1\text{H}$  NMR and  $^{13}\text{C}$  NMR spectra of compound **31a**

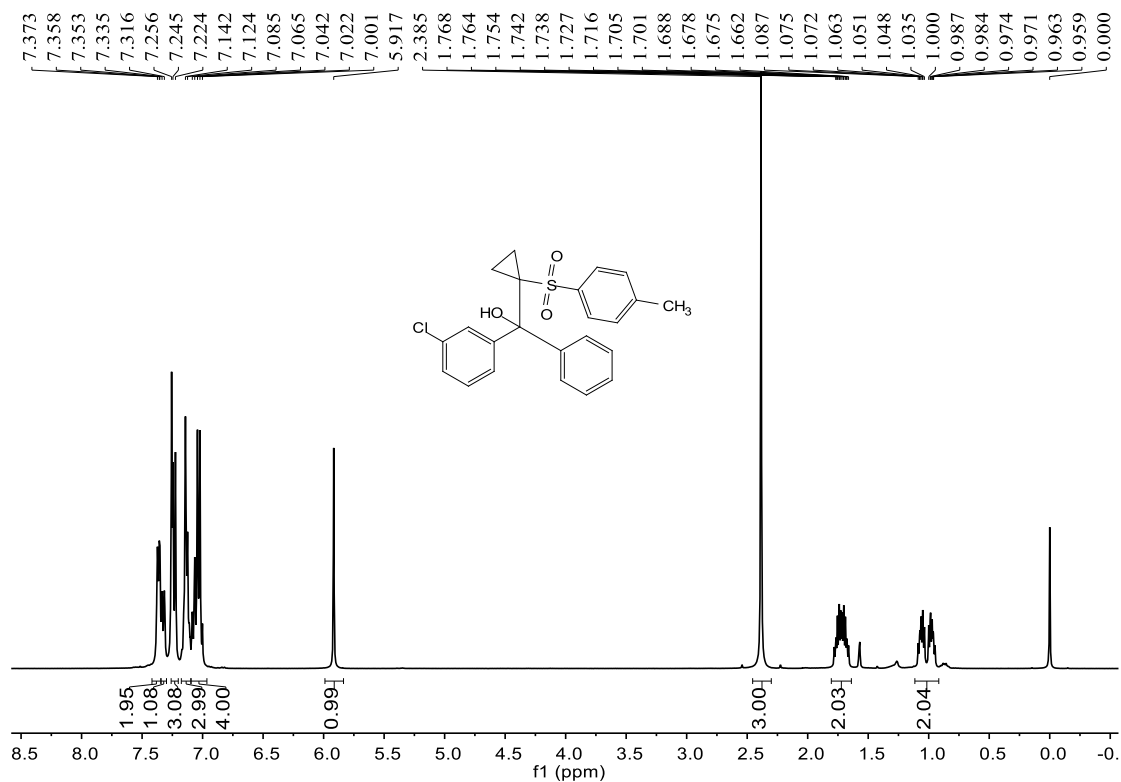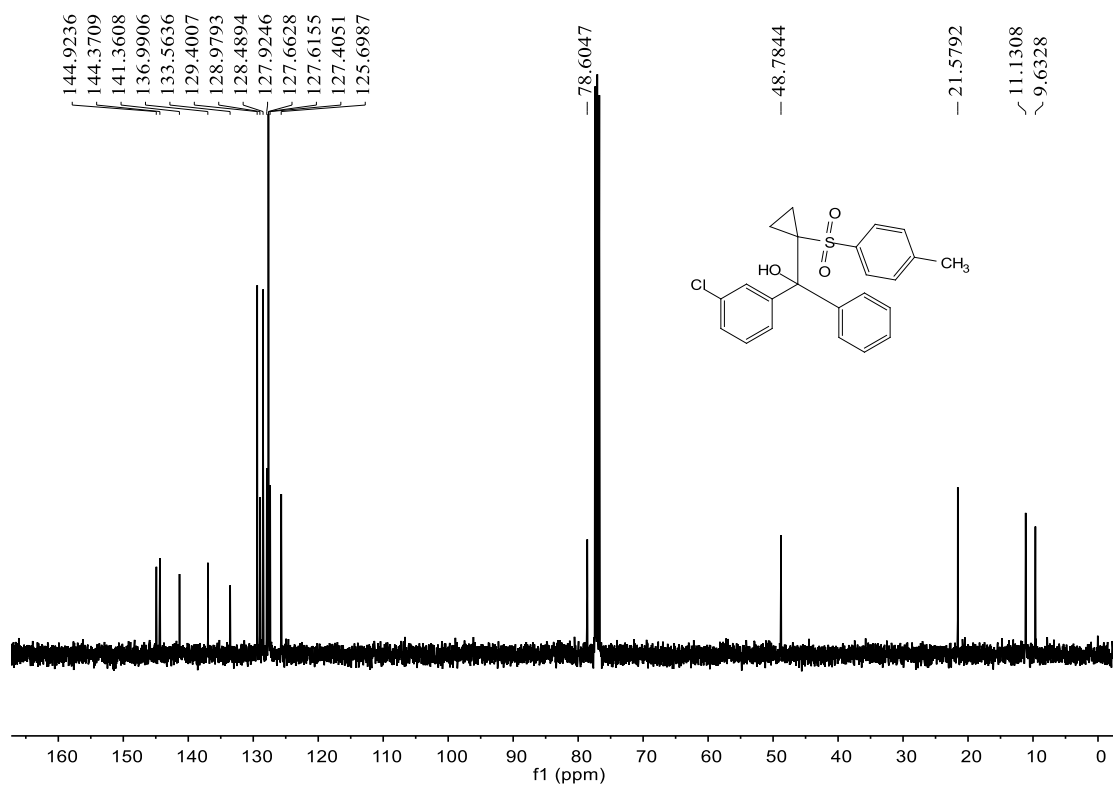

<sup>1</sup>H NMR and <sup>13</sup>C NMR spectra of compound **3ma**

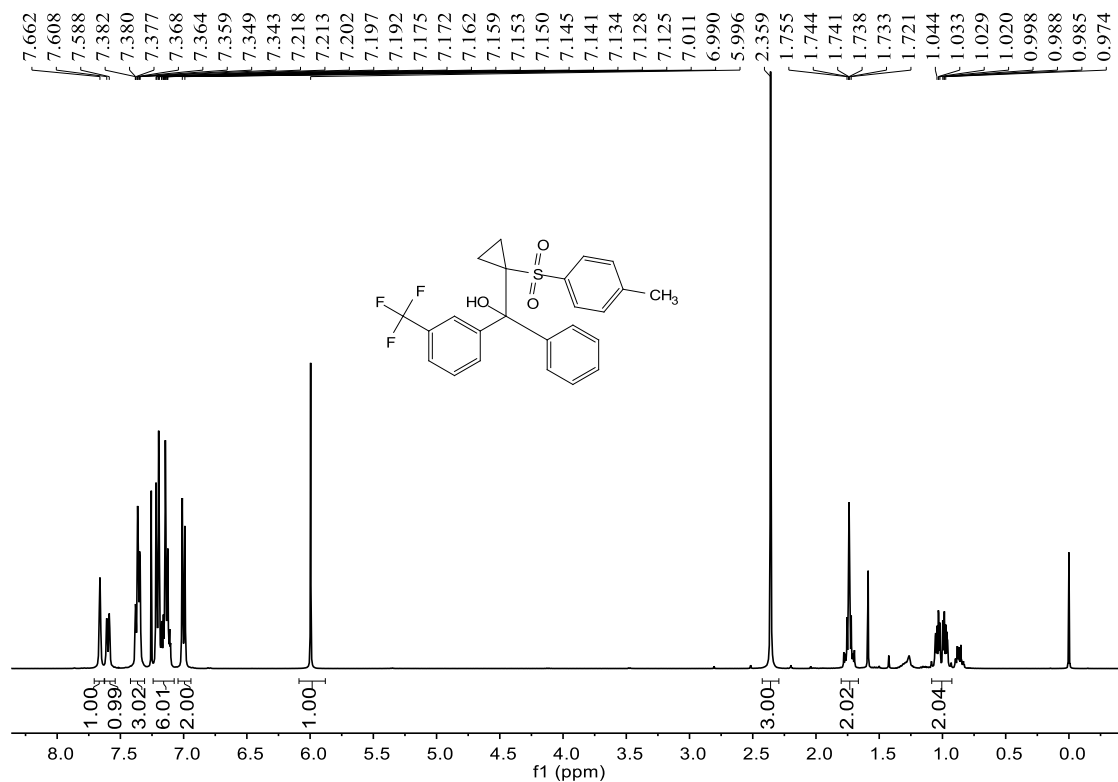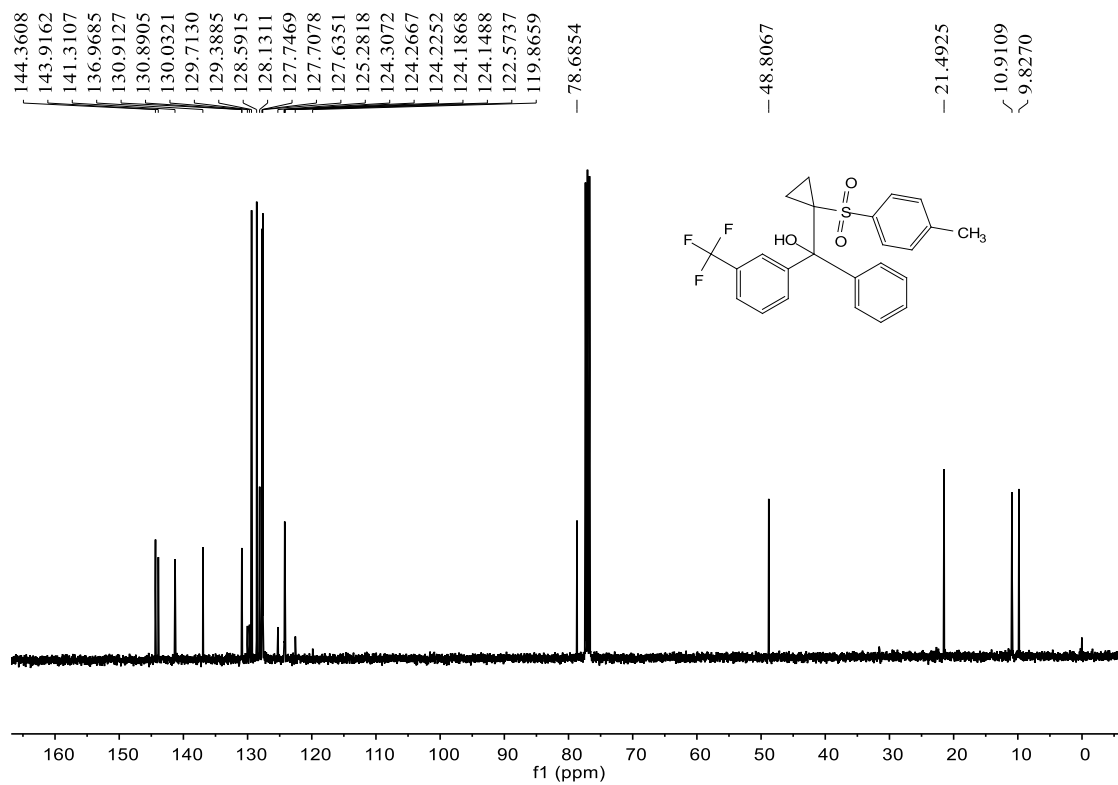

<sup>1</sup>H NMR and <sup>13</sup>C NMR spectra of compound **3na**

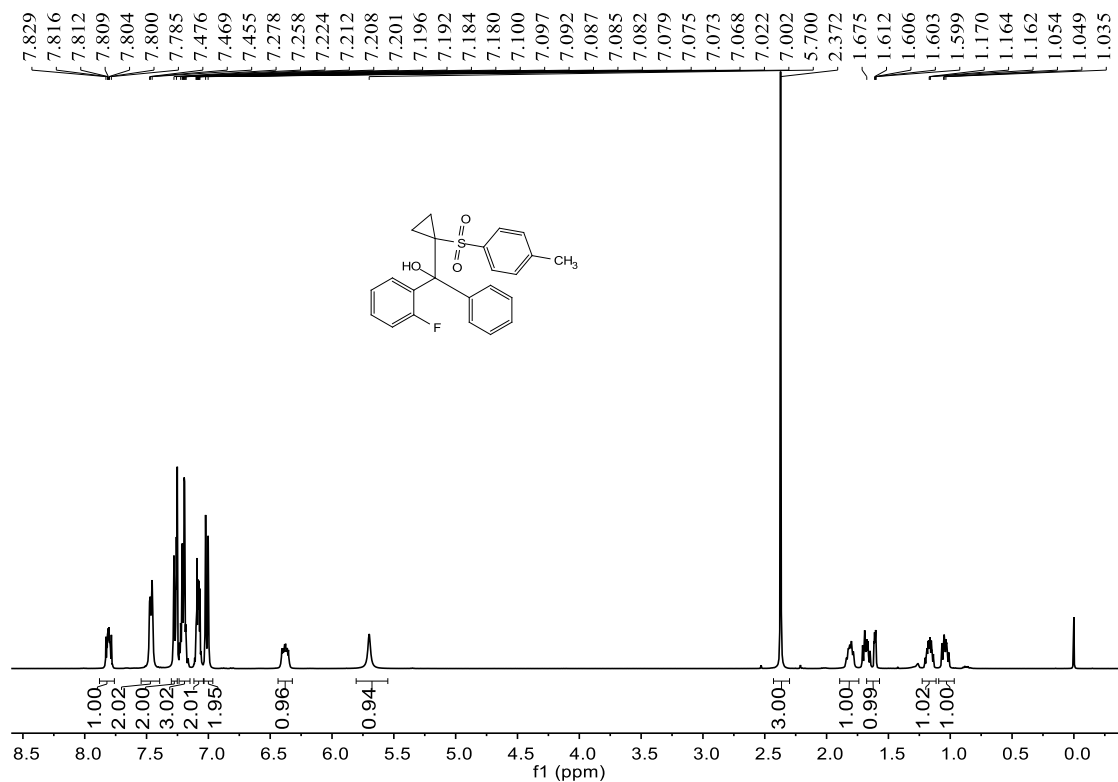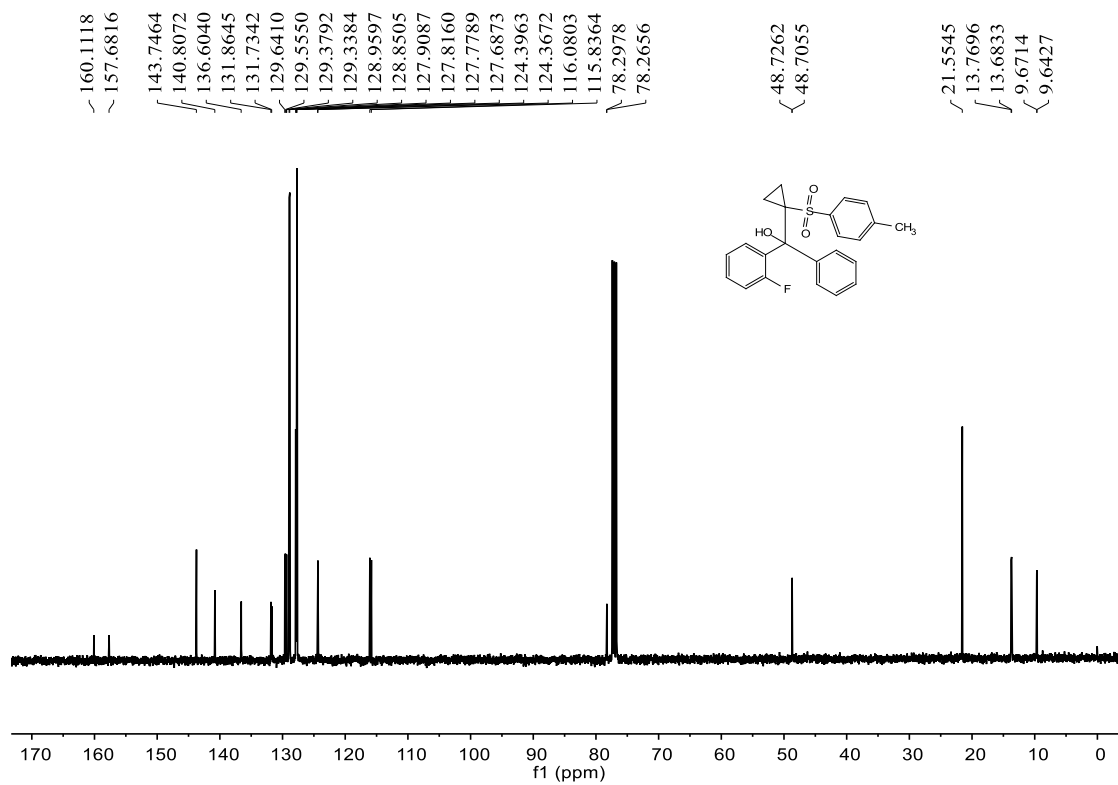

<sup>1</sup>H NMR and <sup>13</sup>C NMR spectra of compound **30a**

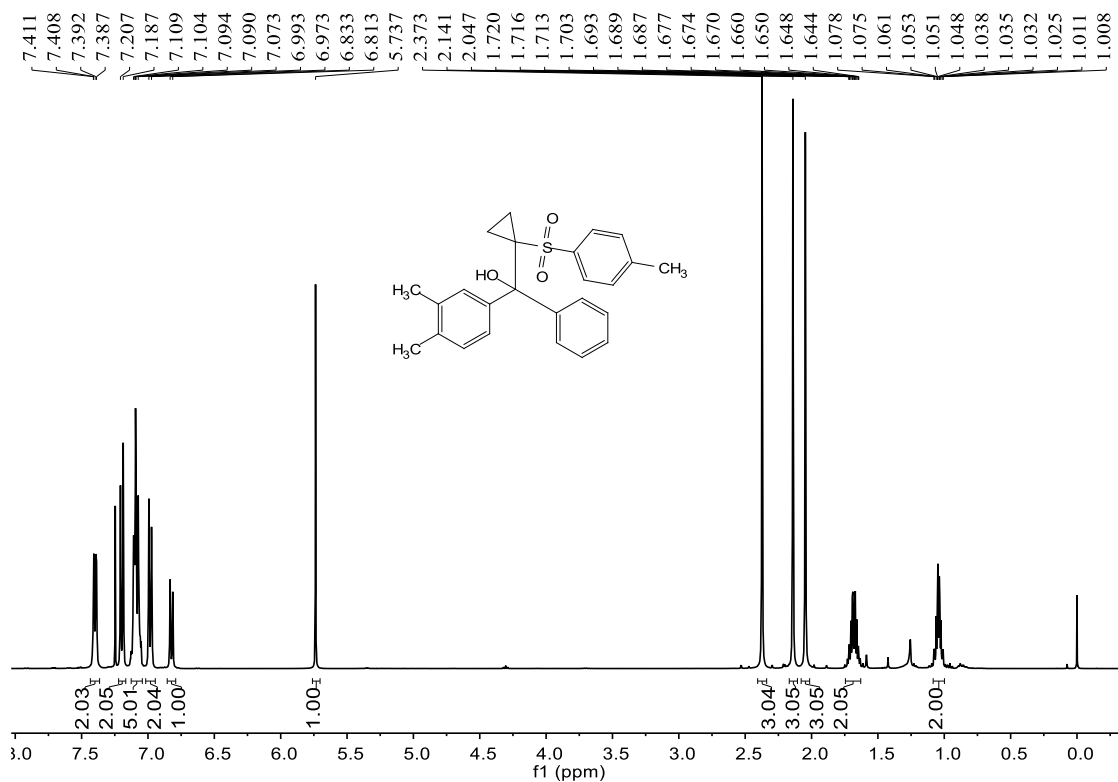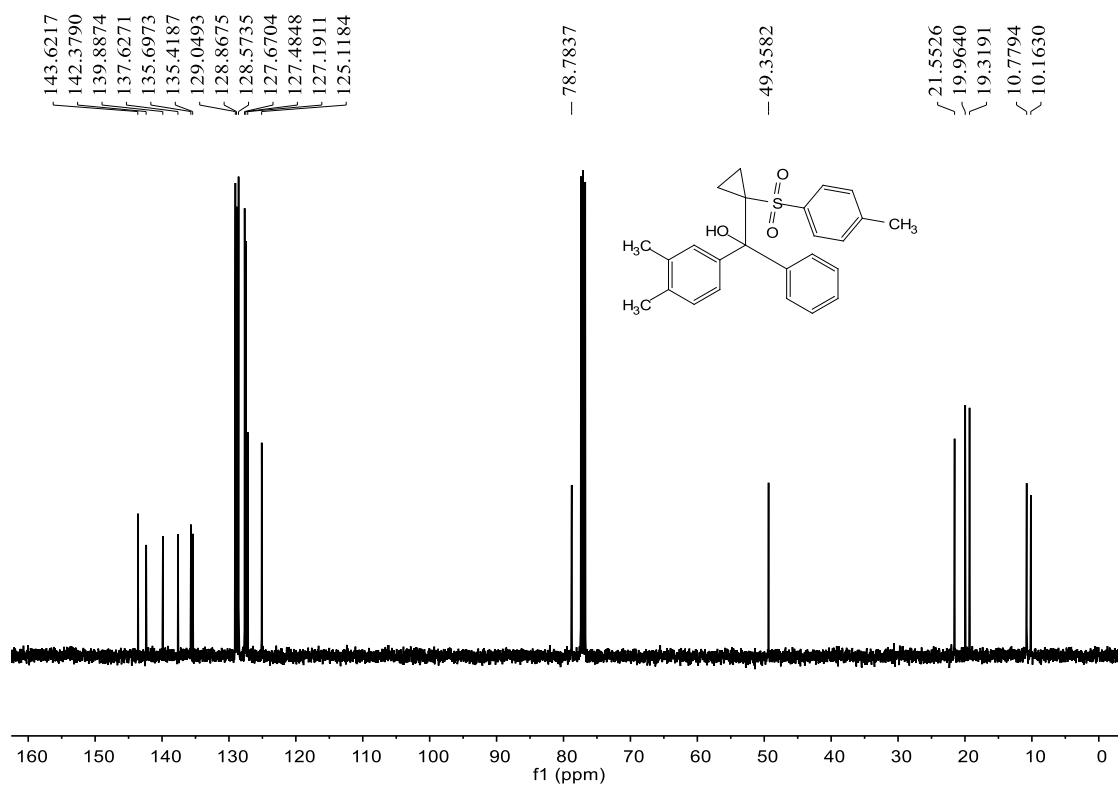



# $^1\text{H}$ NMR and $^{13}\text{C}$ NMR spectra of compound **3pa**

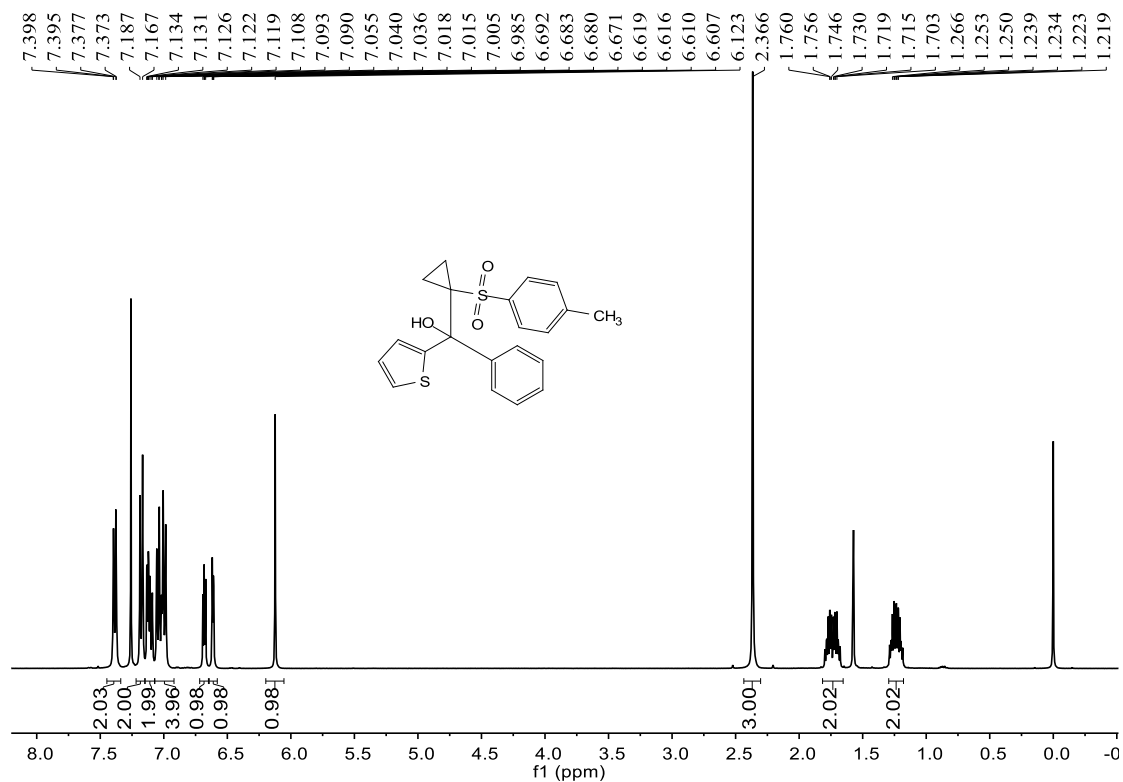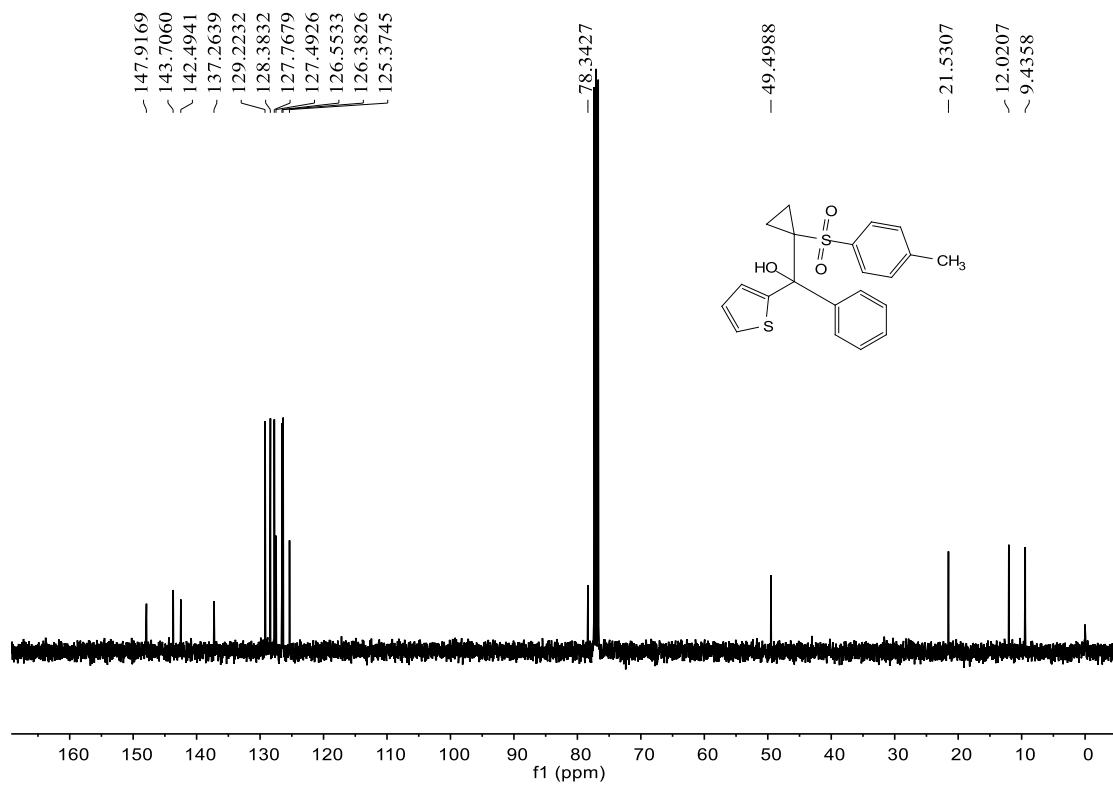

# <sup>1</sup>H NMR and <sup>13</sup>C NMR spectra of compound 3qa

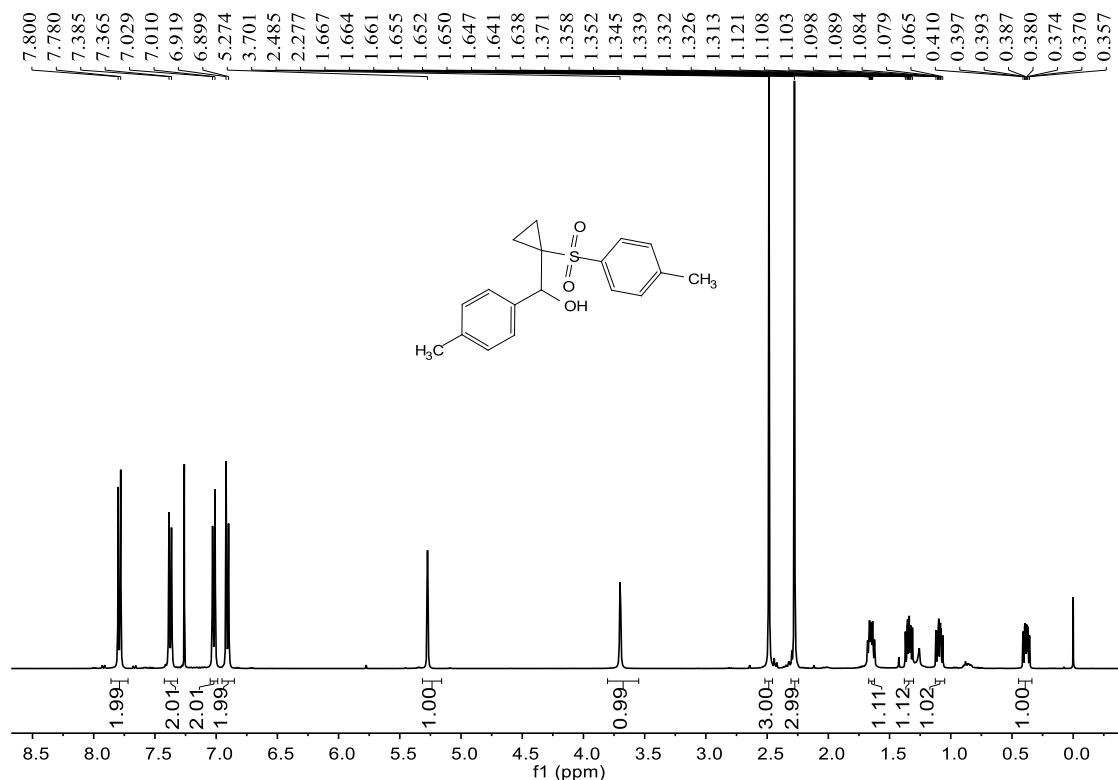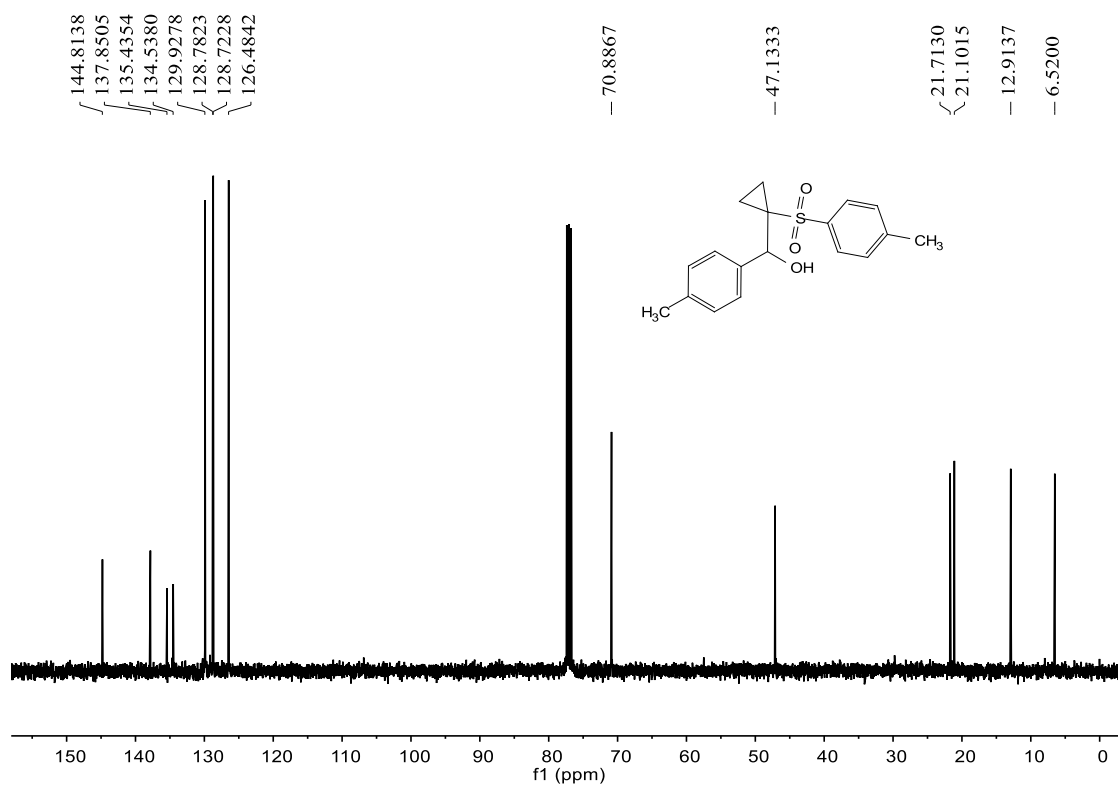

<sup>1</sup>H NMR and <sup>13</sup>C NMR spectra of compound **3ra**

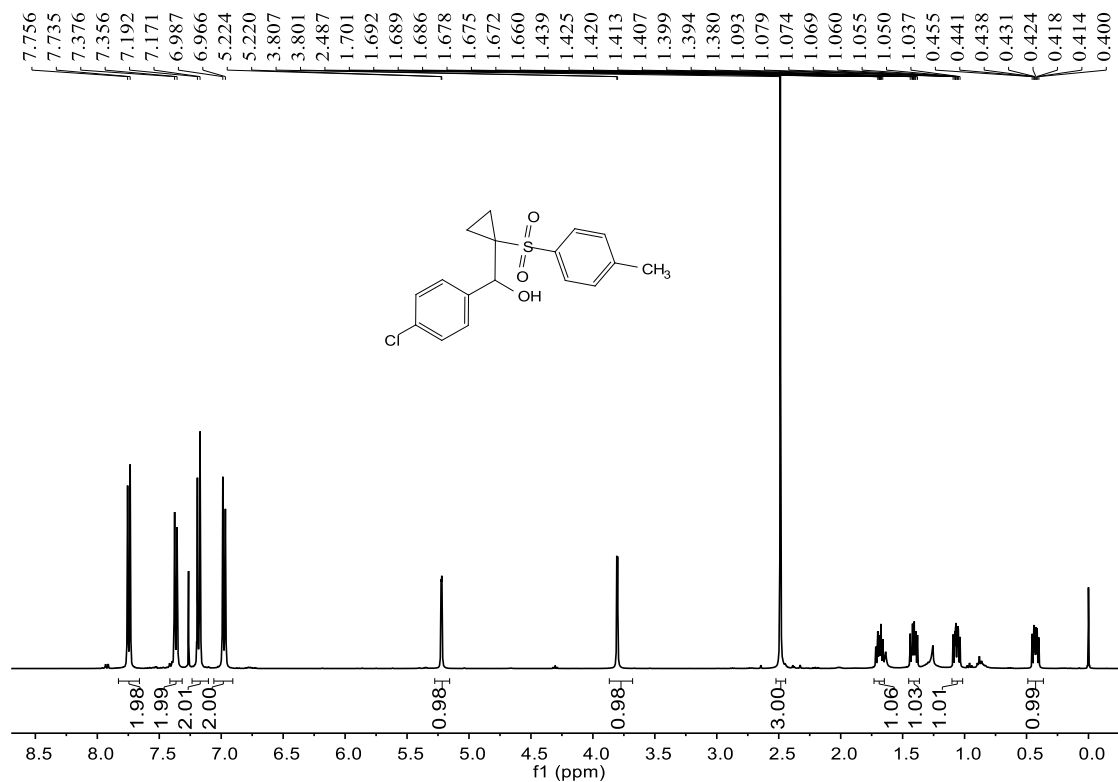

145.0258  
136.2364  
135.2366  
133.9110  
129.9973  
128.6633  
128.3032  
127.9355

70.7328

46.9535

21.7182

12.8153

6.9498

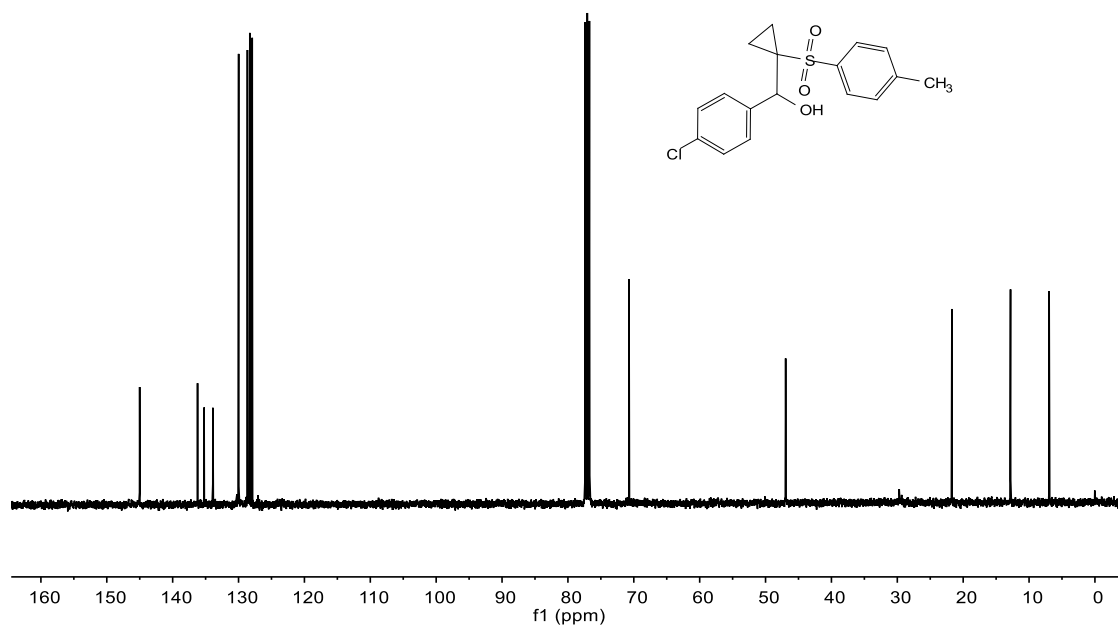

<sup>1</sup>H NMR and <sup>13</sup>C NMR spectra of compound **3sa**

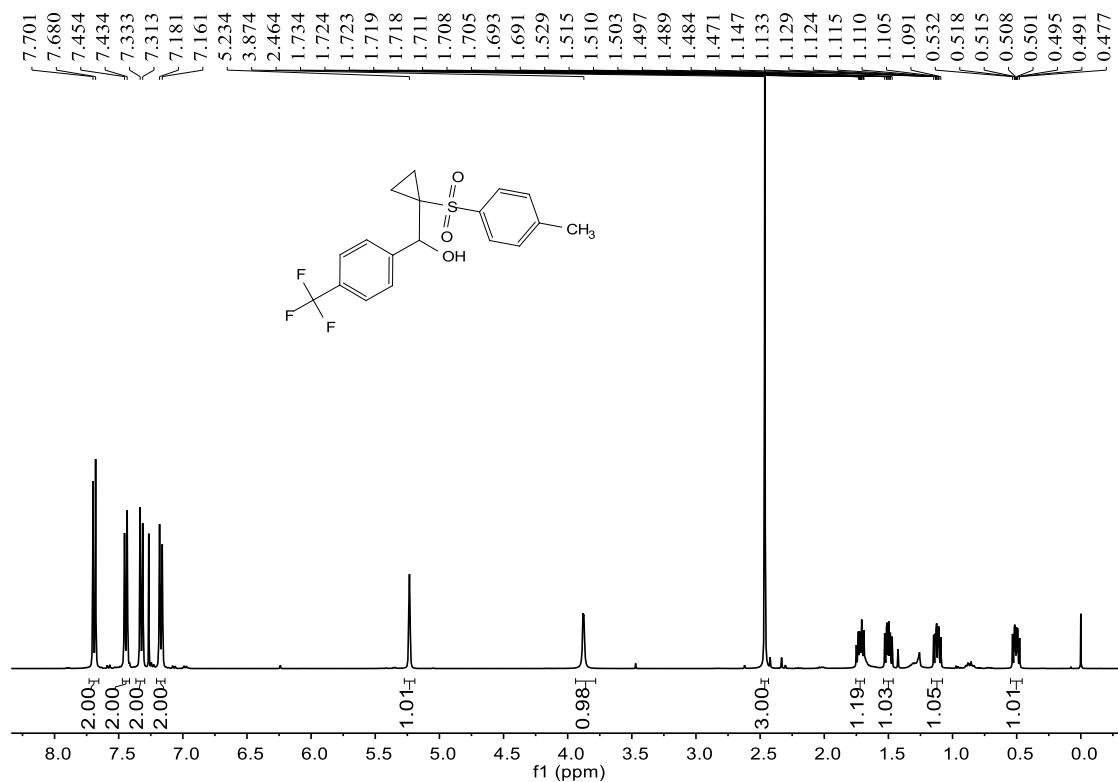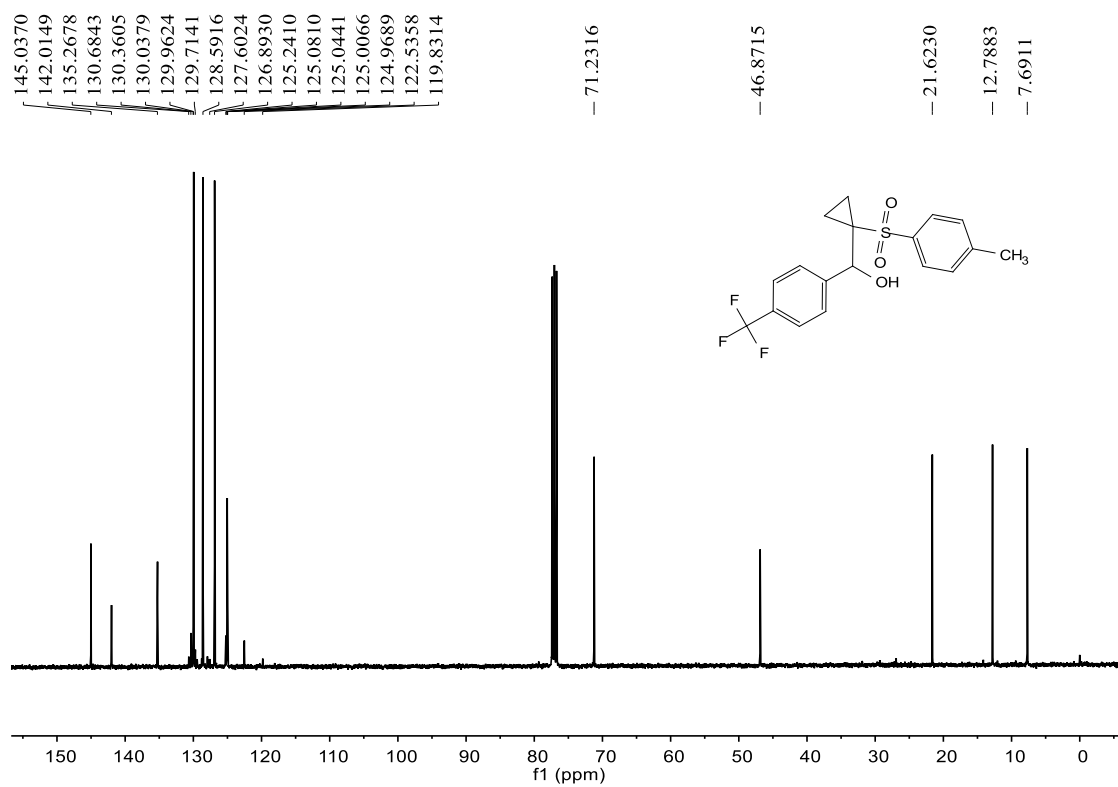

<sup>1</sup>H NMR and <sup>13</sup>C NMR spectra of compound **3ta**

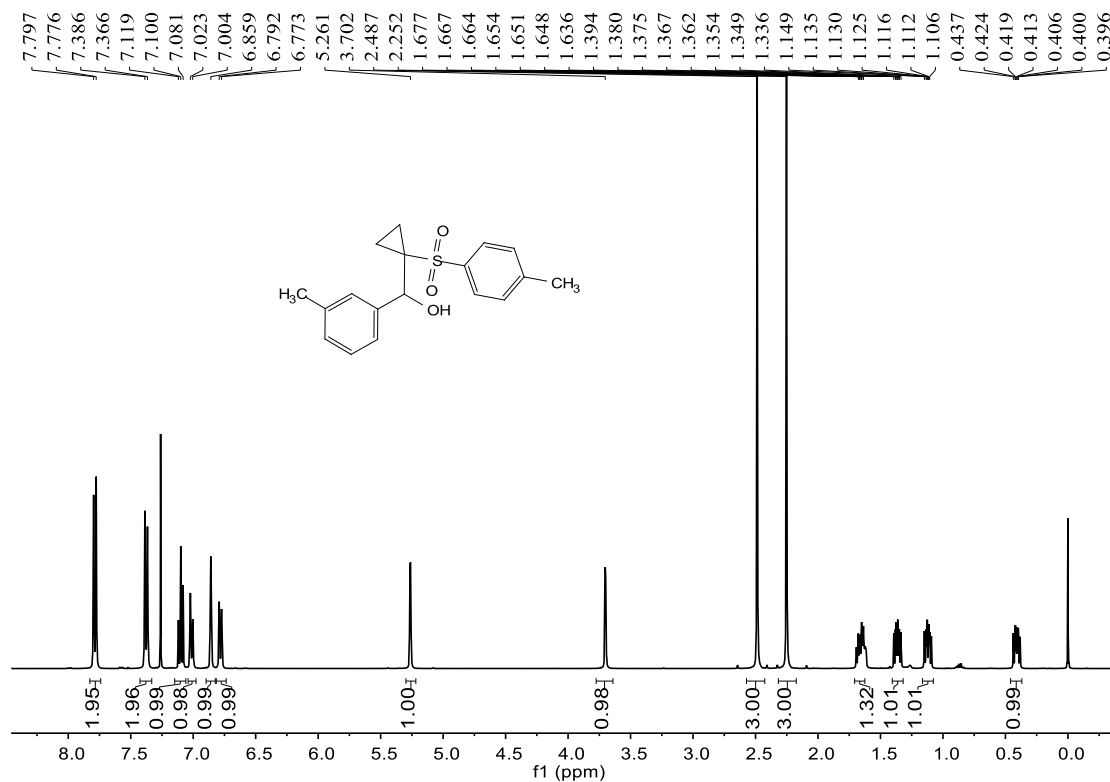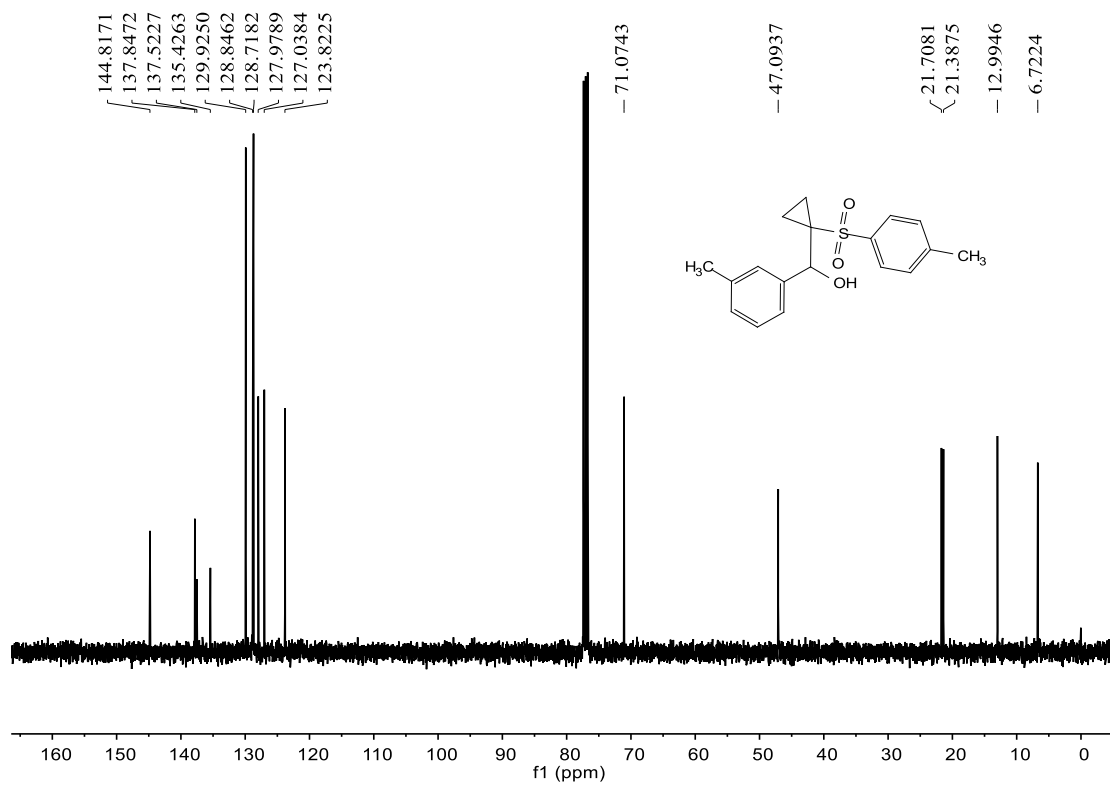

<sup>1</sup>H NMR and <sup>13</sup>C NMR spectra of compound **3ua**

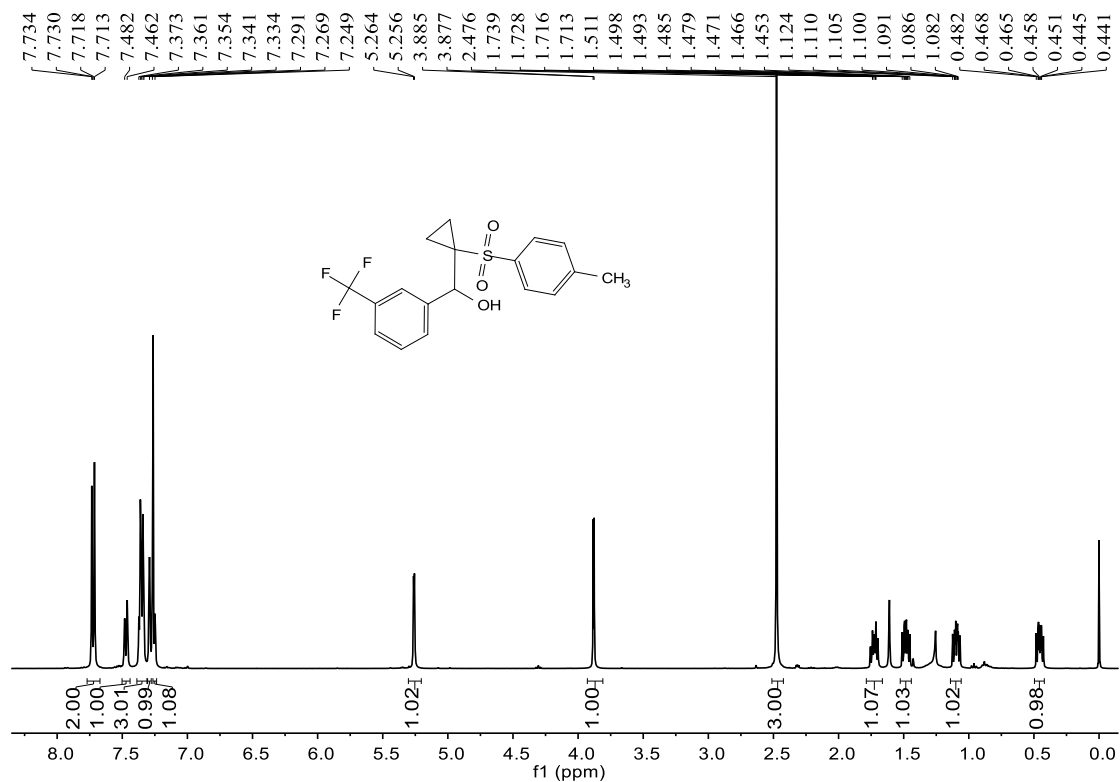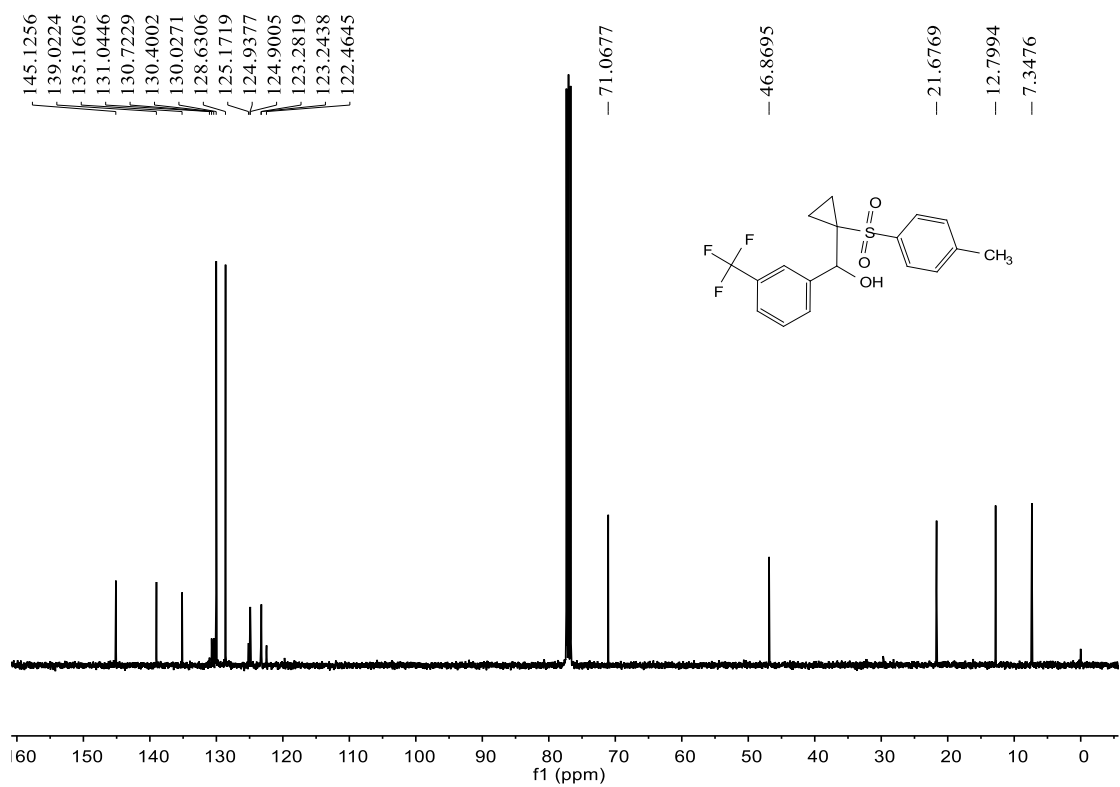

$^1\text{H}$  NMR and  $^{13}\text{C}$  NMR spectra of compound **3va**

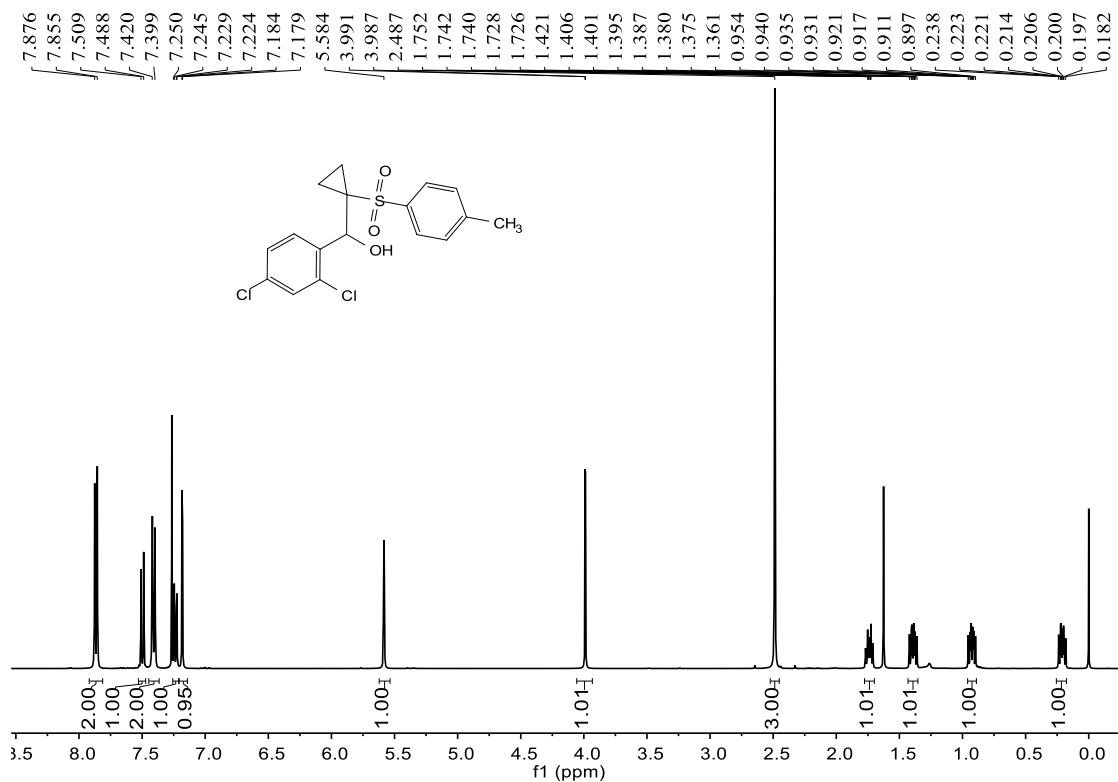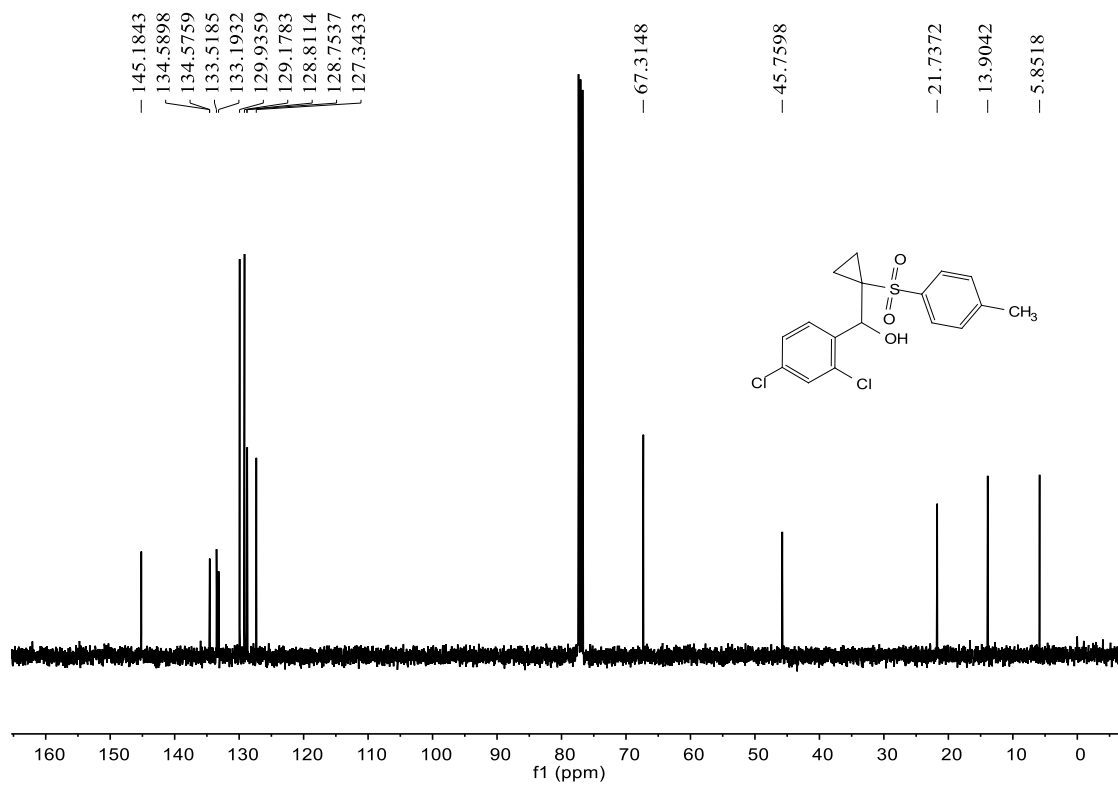

<sup>1</sup>H NMR and <sup>13</sup>C NMR spectra of compound **3wa**

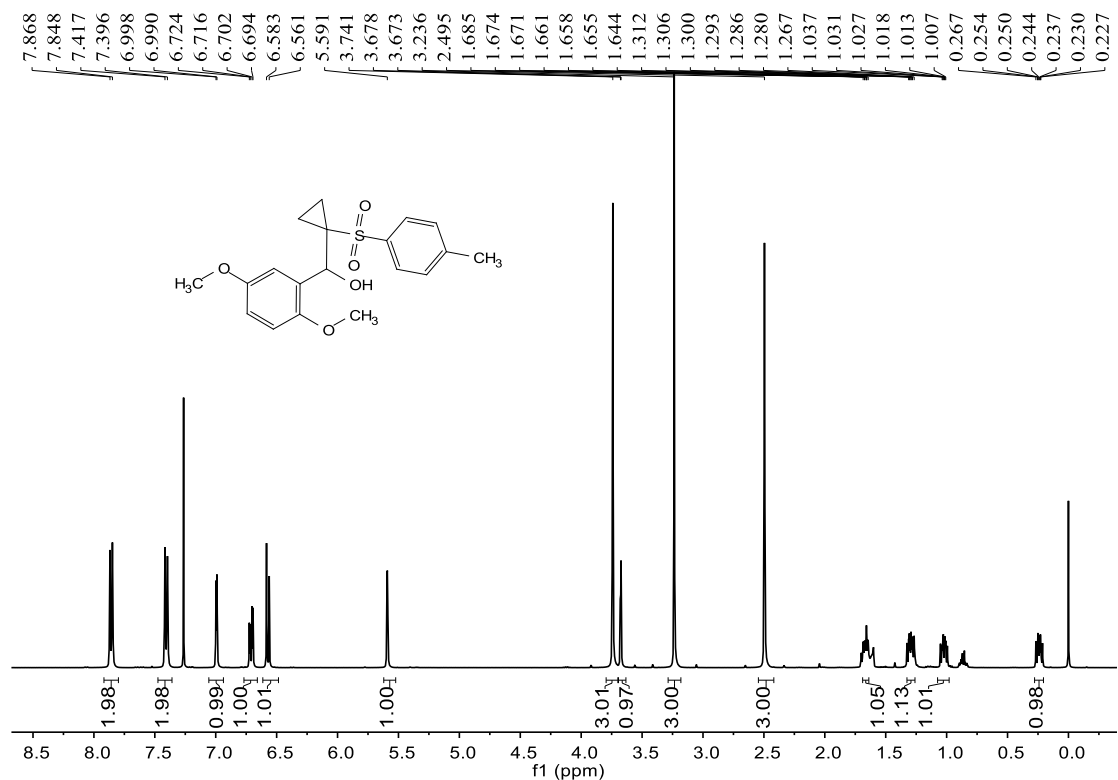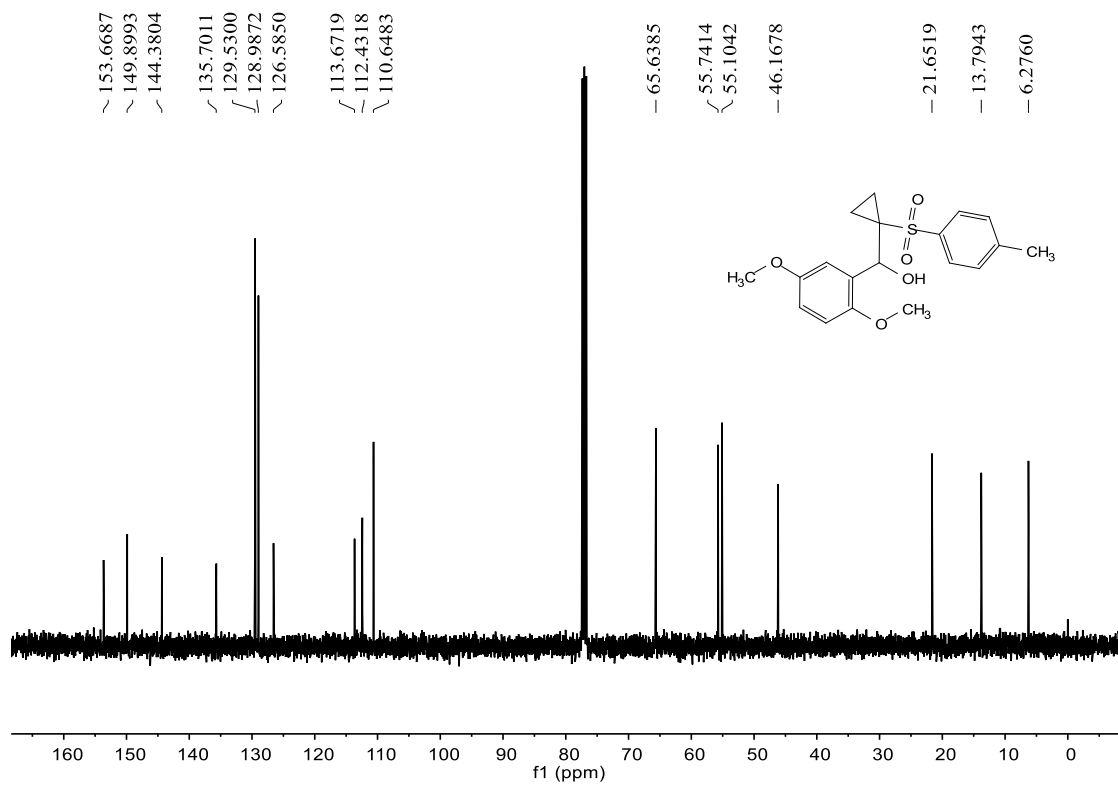



<sup>1</sup>H NMR and <sup>13</sup>C NMR spectra of compound **3xa**

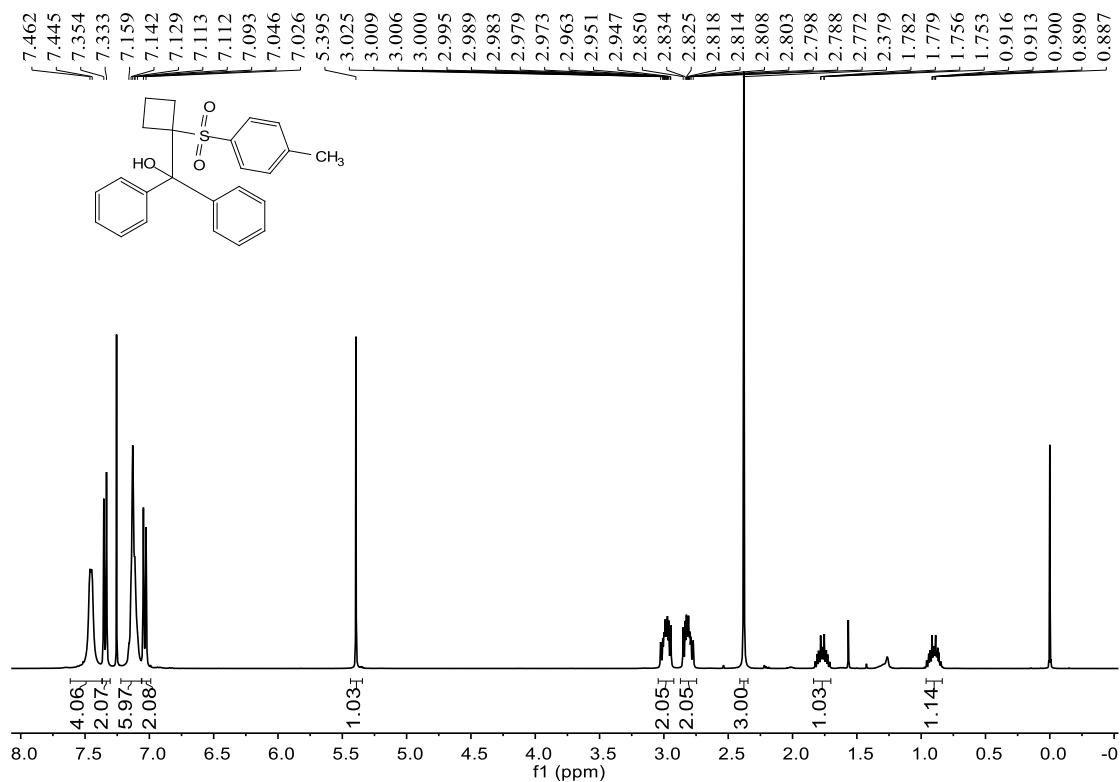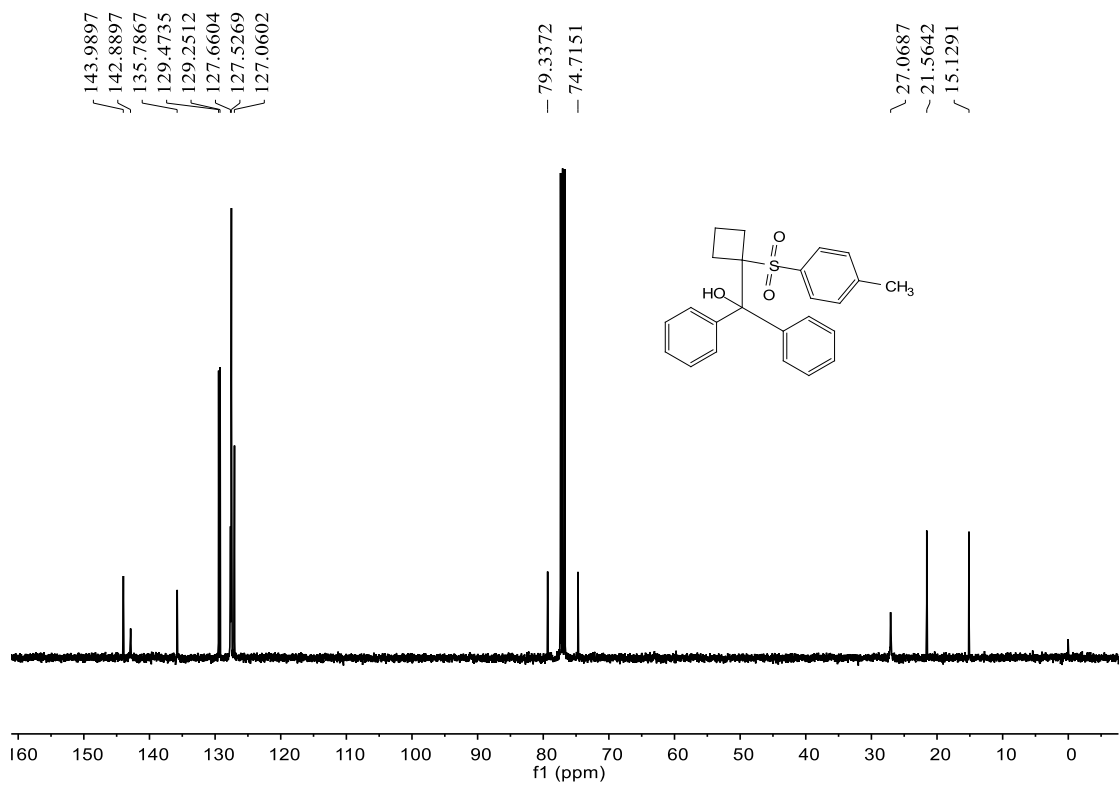

<sup>1</sup>H NMR and <sup>13</sup>C NMR spectra of compound **3ab**

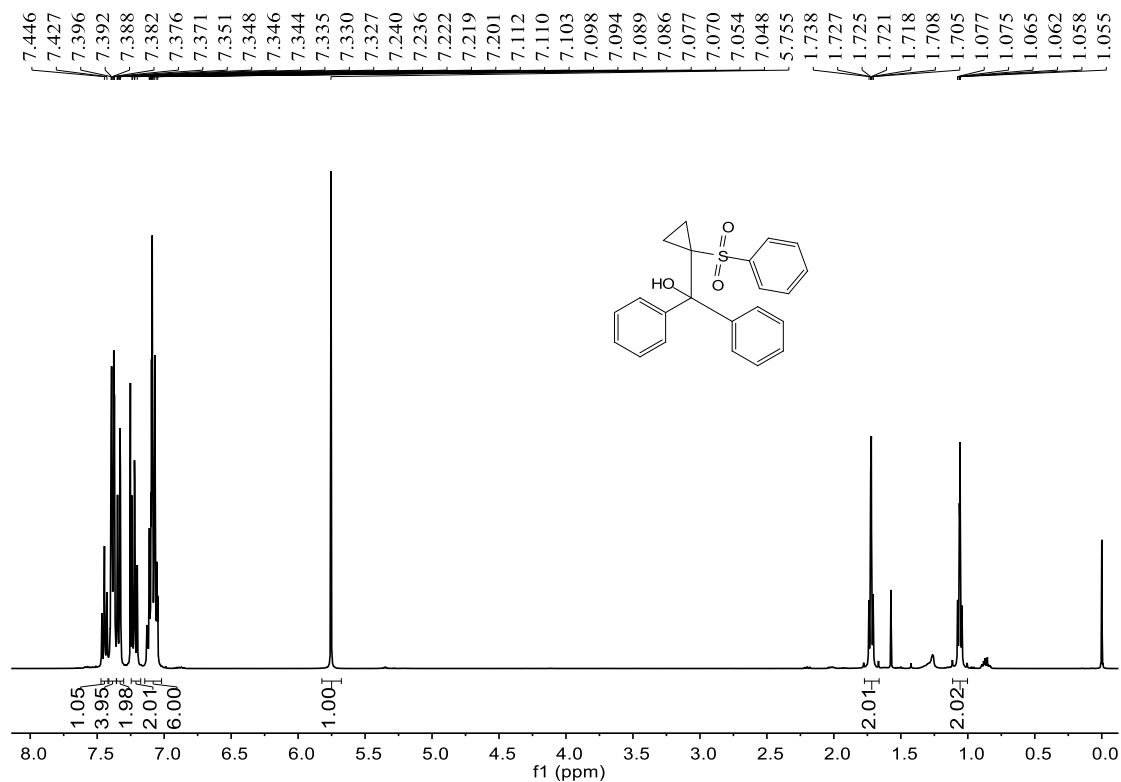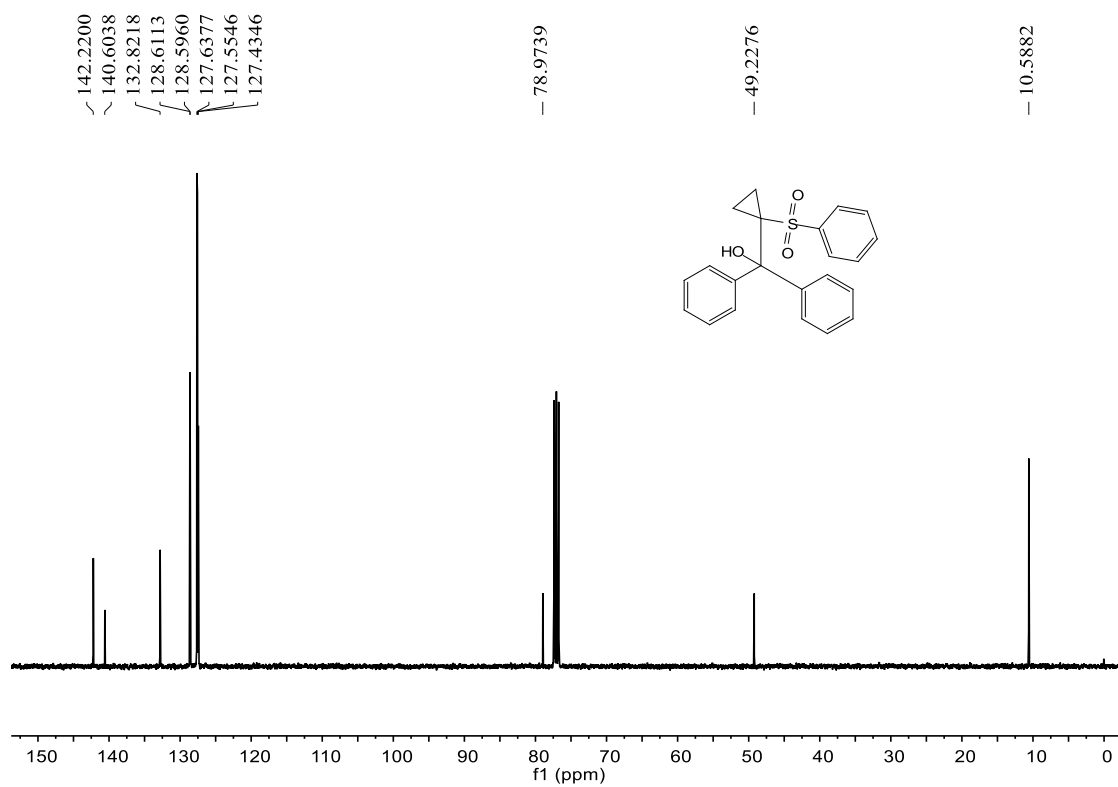

<sup>1</sup>H NMR and <sup>13</sup>C NMR spectra of compound **3ac**

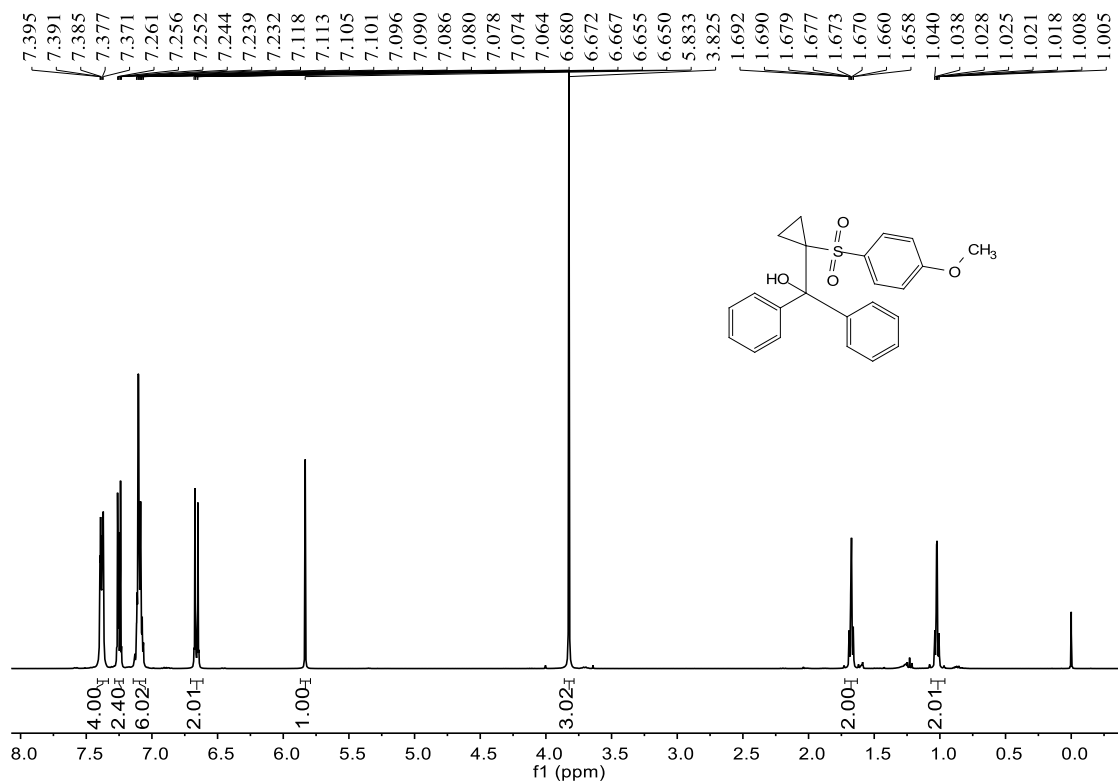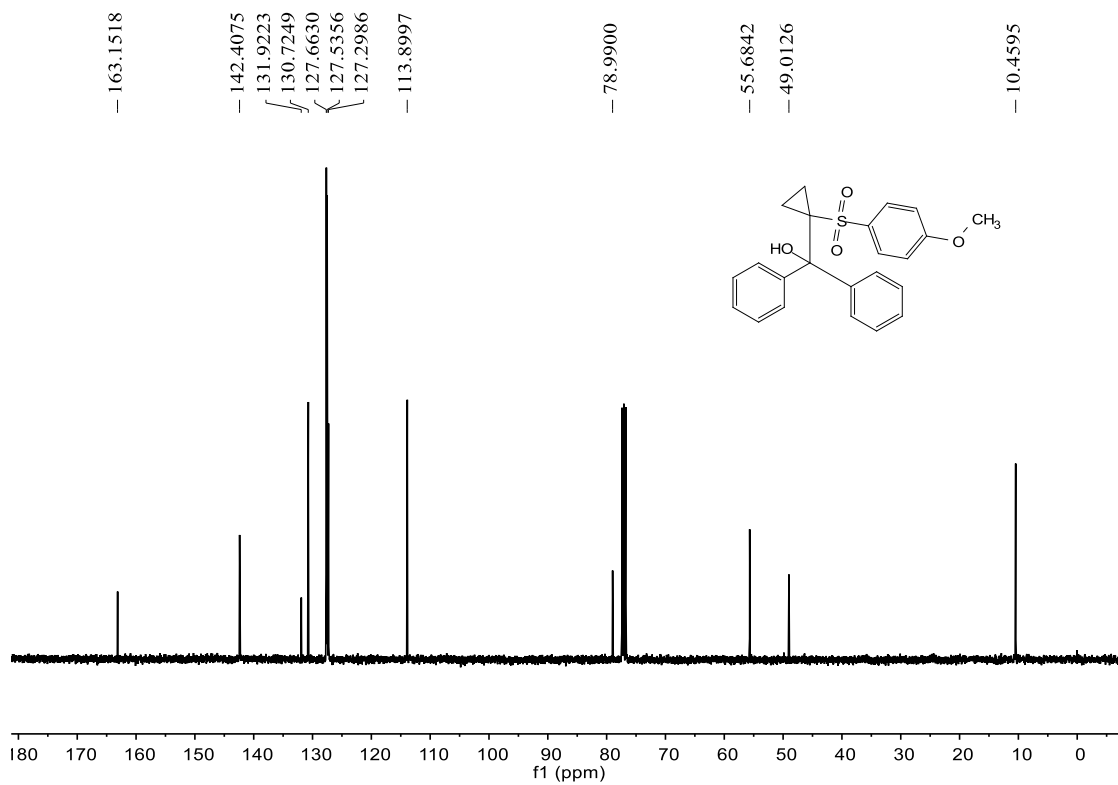

<sup>1</sup>H NMR and <sup>13</sup>C NMR spectra of compound **3ad**

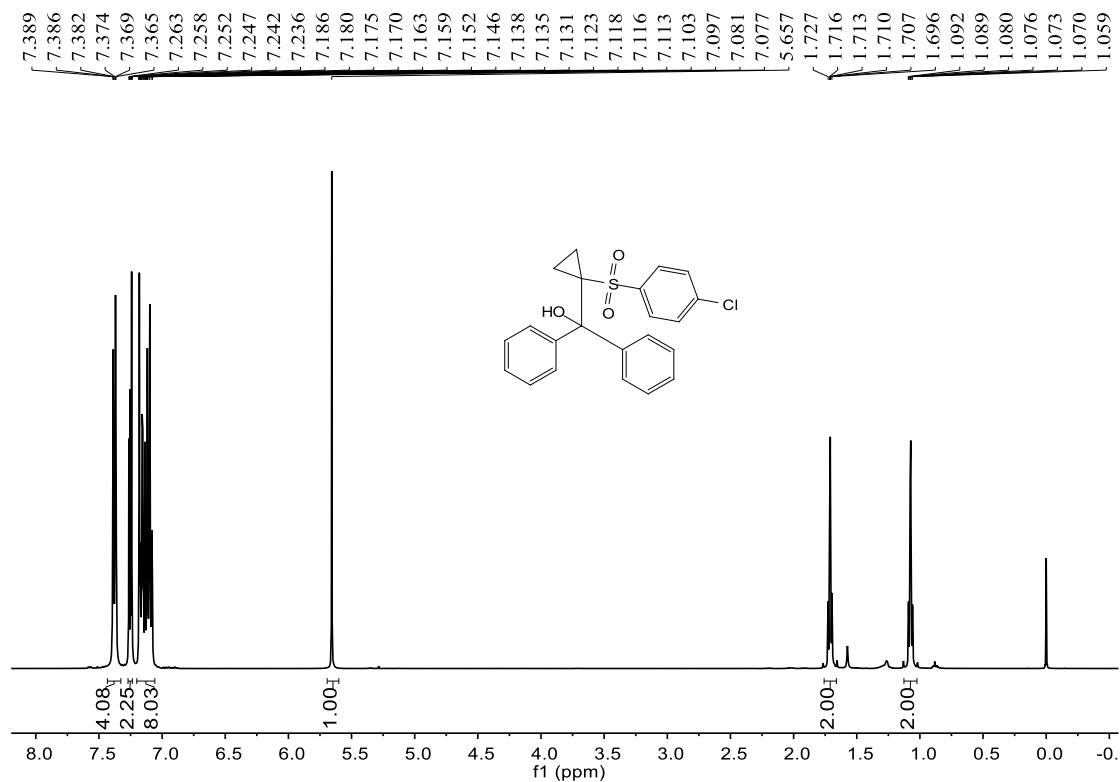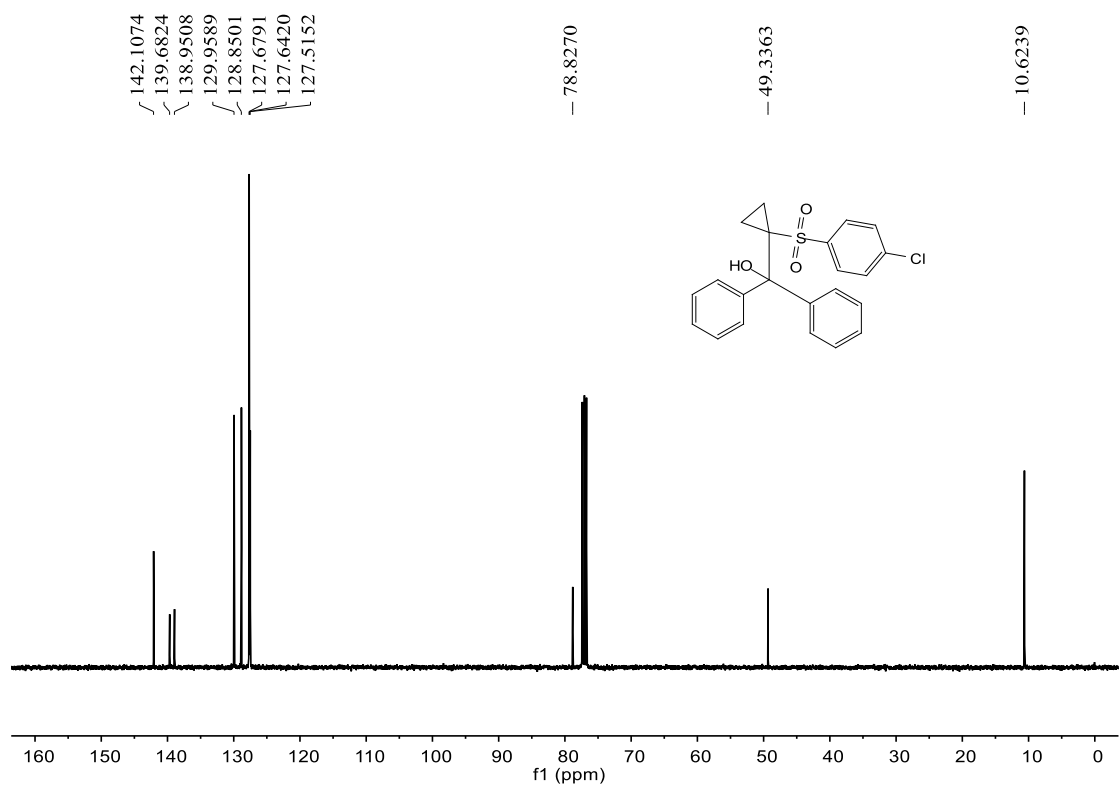

<sup>1</sup>H NMR and <sup>13</sup>C NMR spectra of compound **3ae**

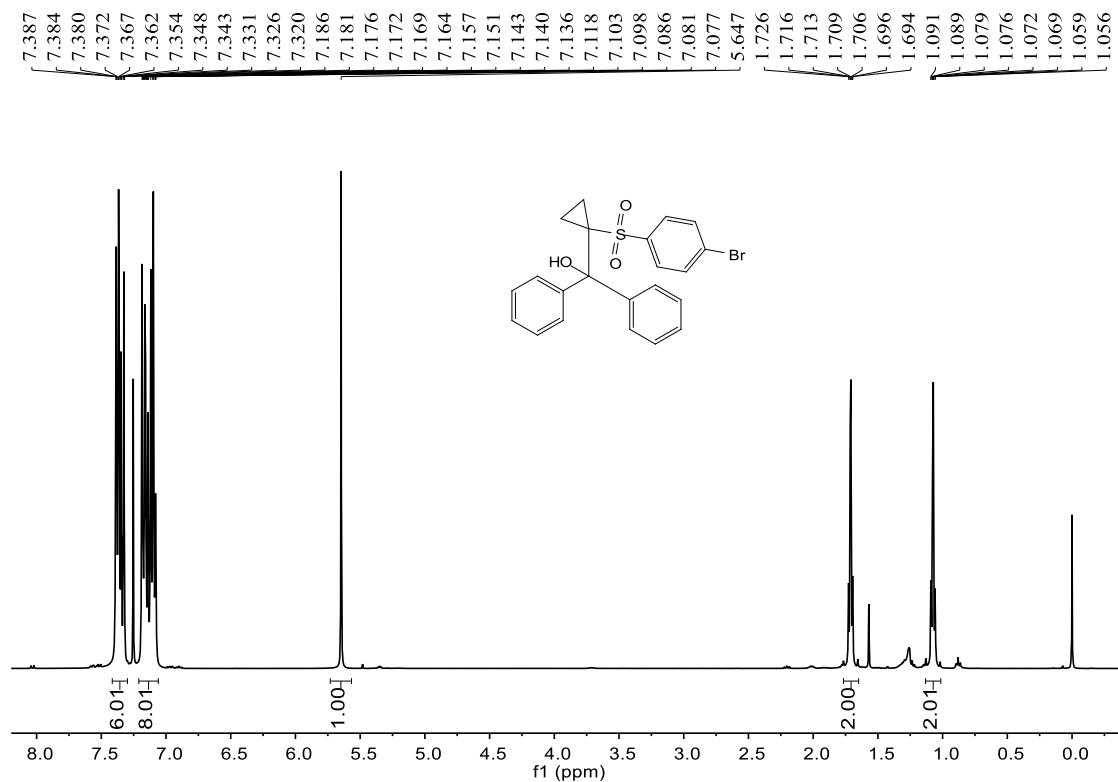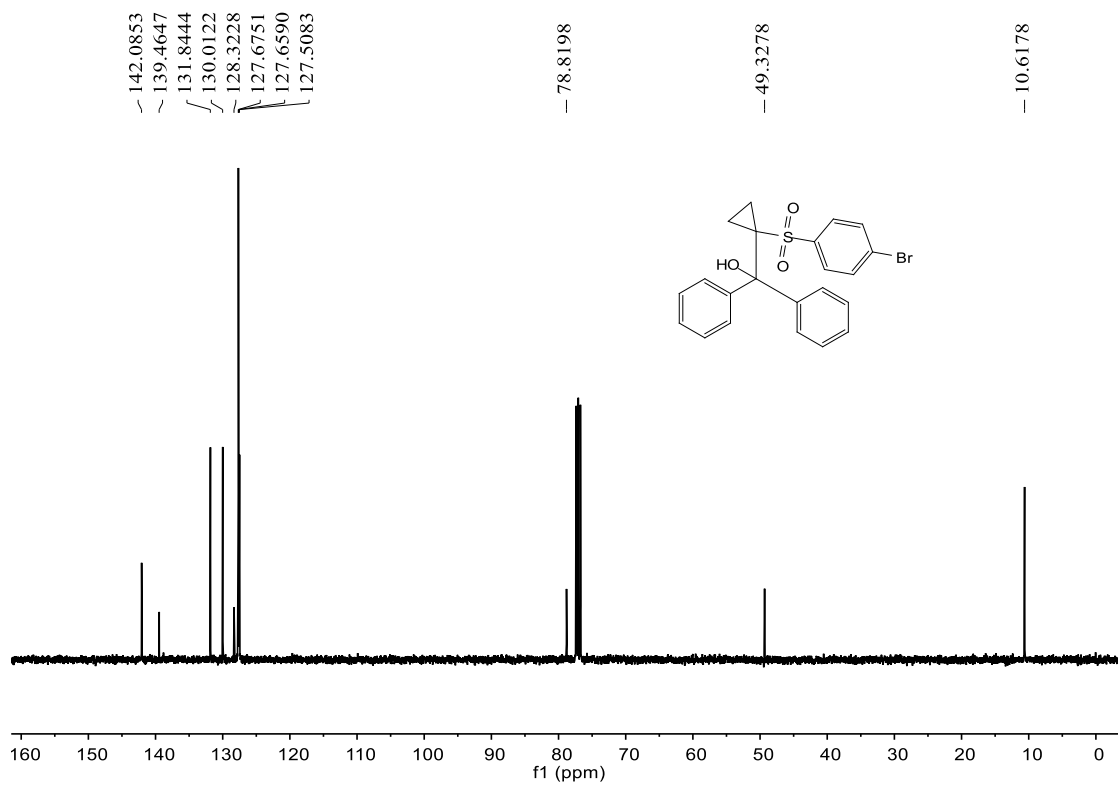

<sup>1</sup>H NMR and <sup>13</sup>C NMR spectra of compound **3af**

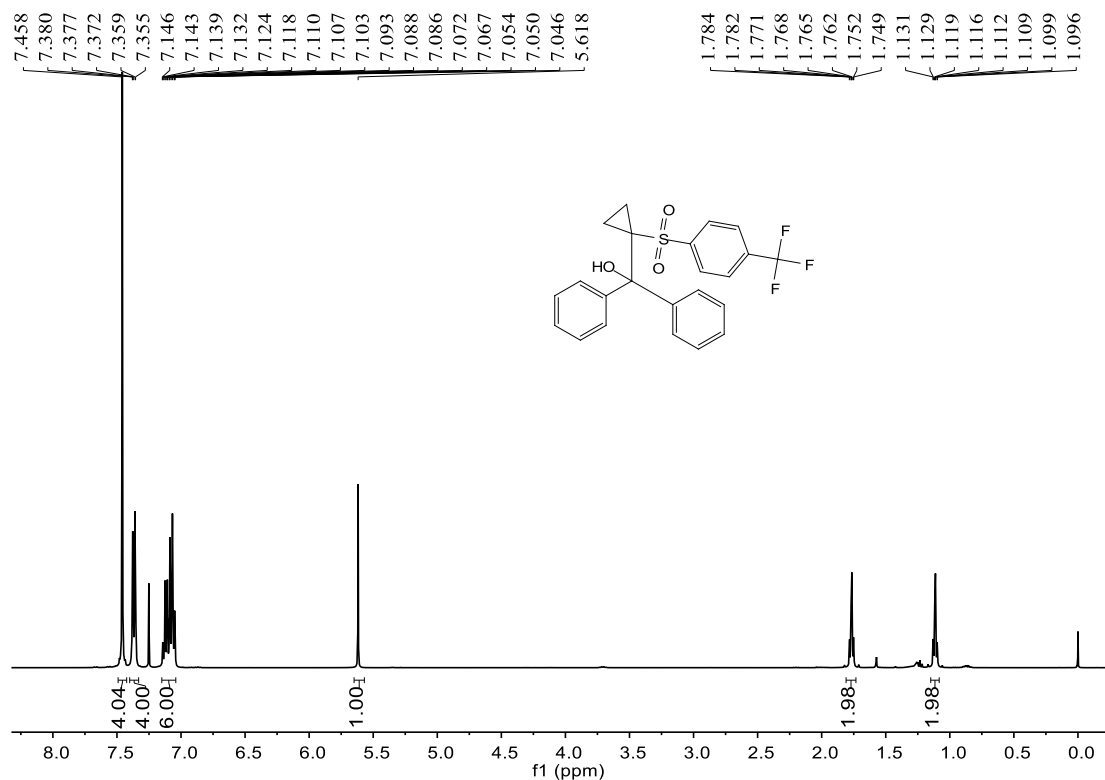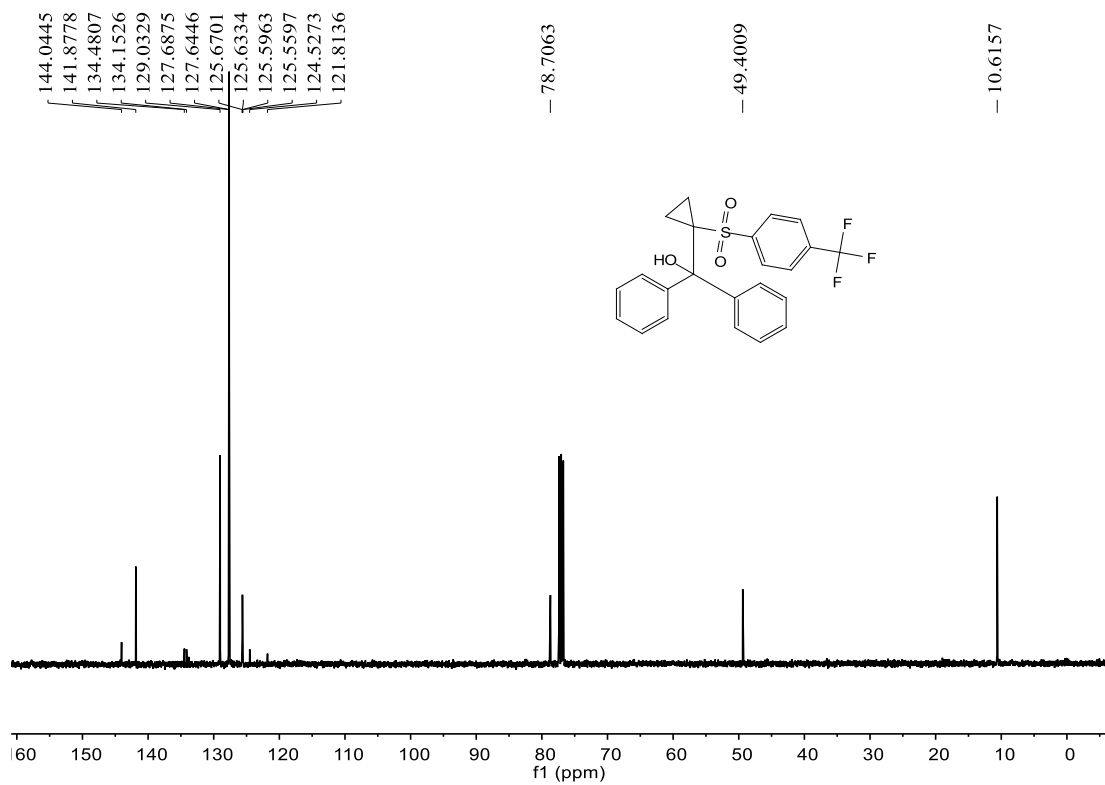

<sup>1</sup>H NMR and <sup>13</sup>C NMR spectra of compound **3ag**

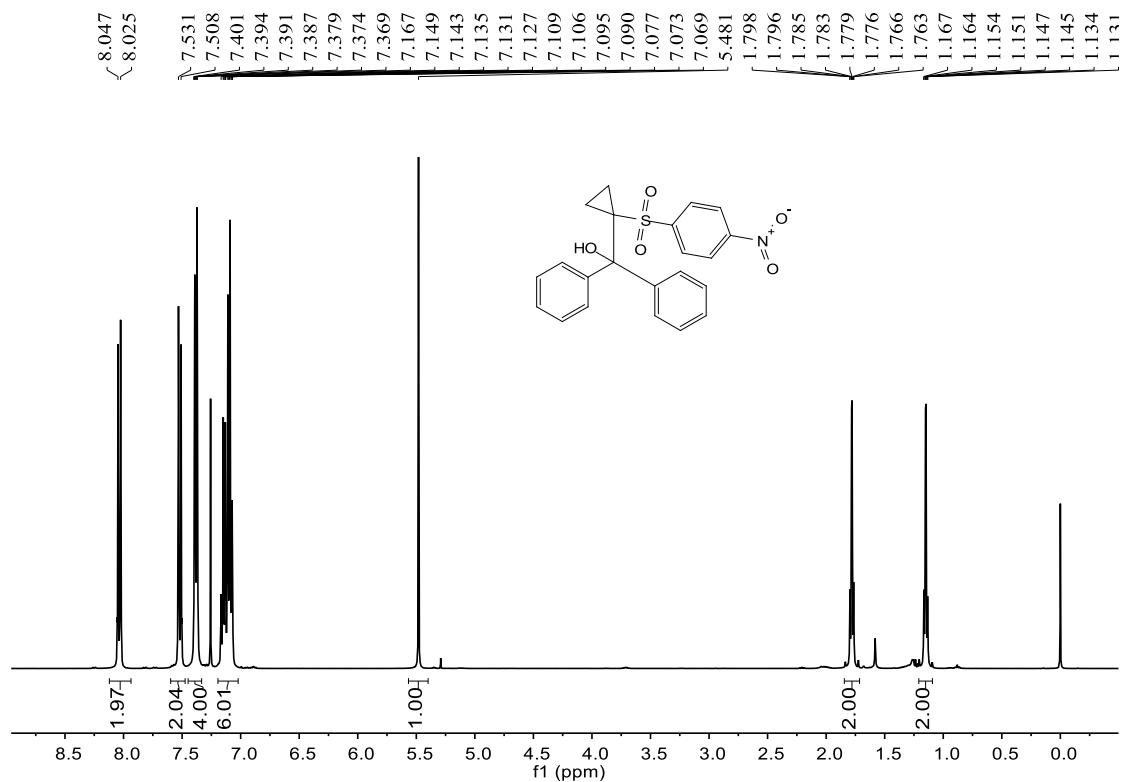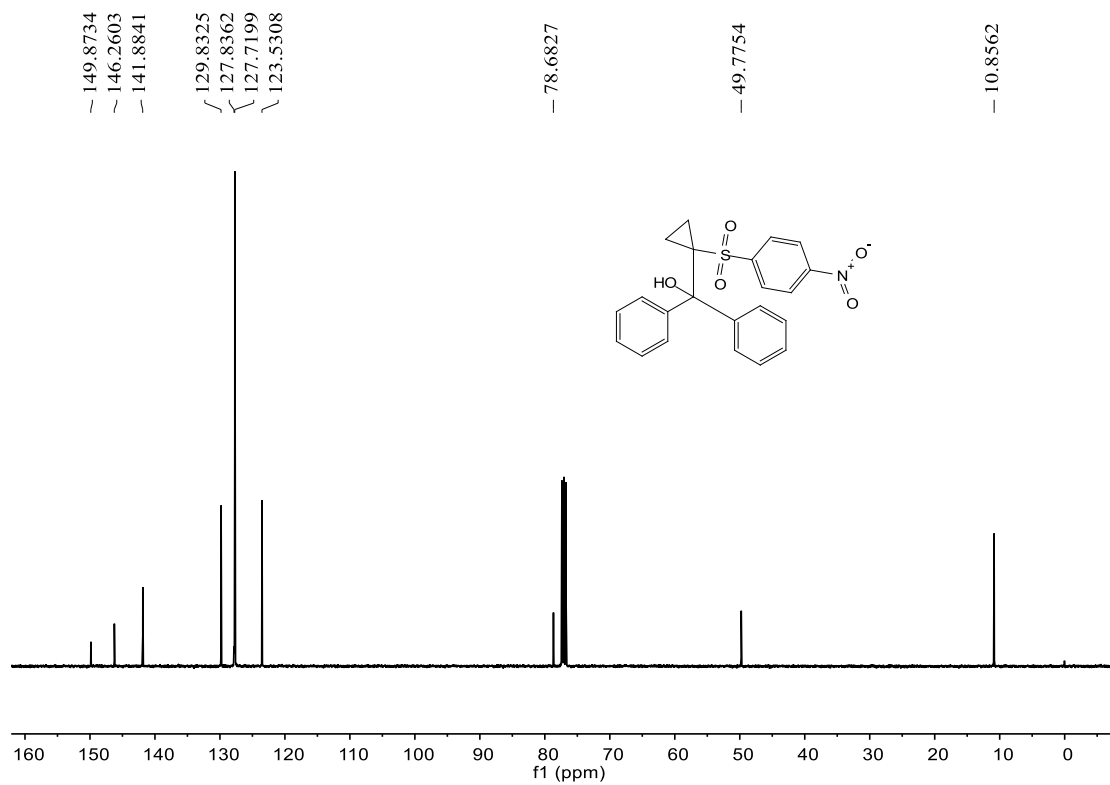

<sup>1</sup>H NMR and <sup>13</sup>C NMR spectra of compound **3ah**

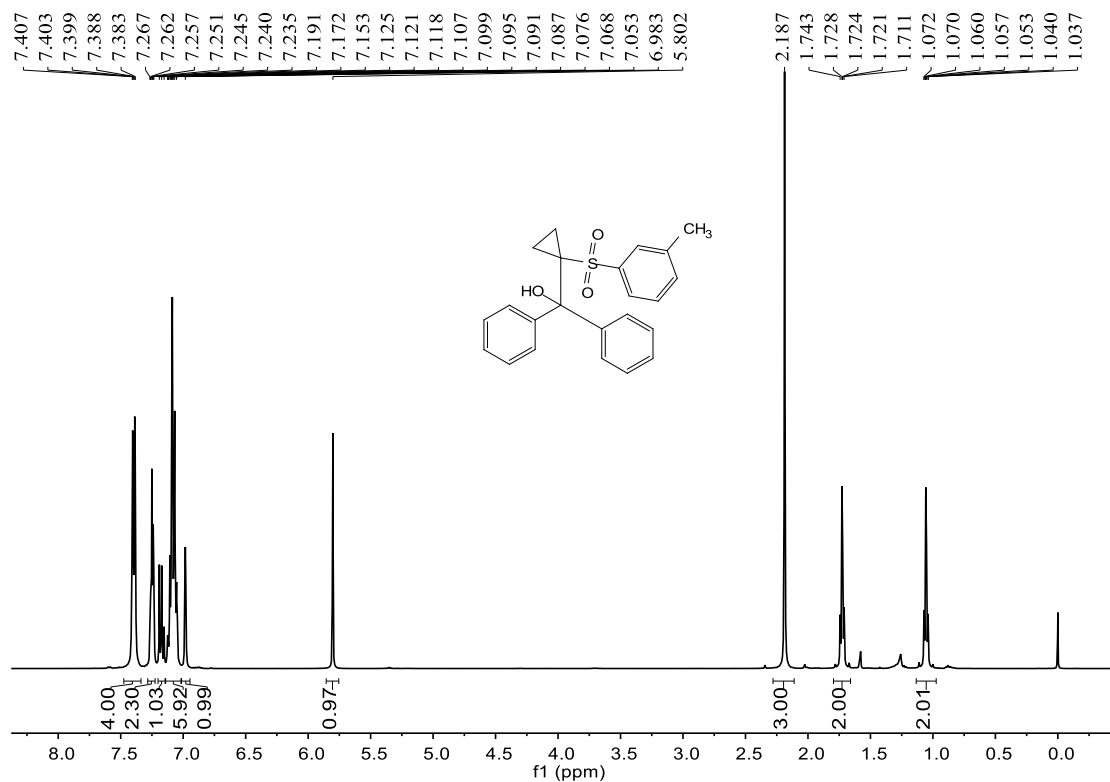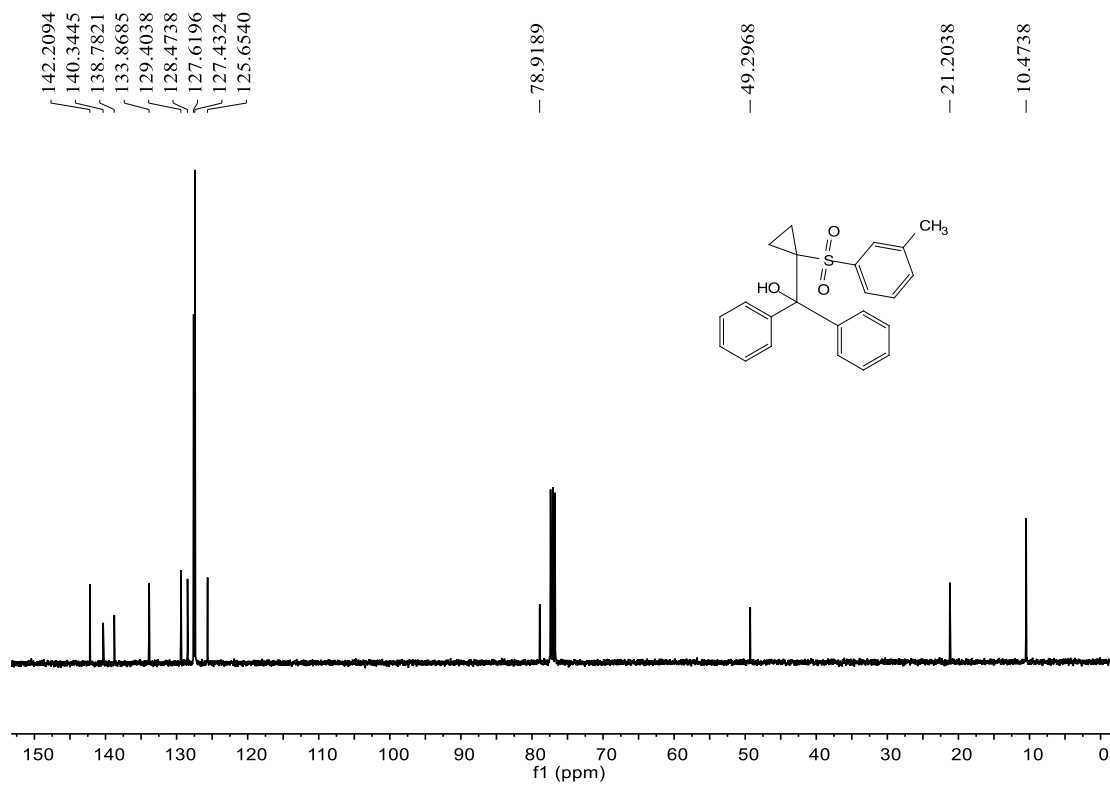



<sup>1</sup>H NMR and <sup>13</sup>C NMR spectra of compound **3ai**

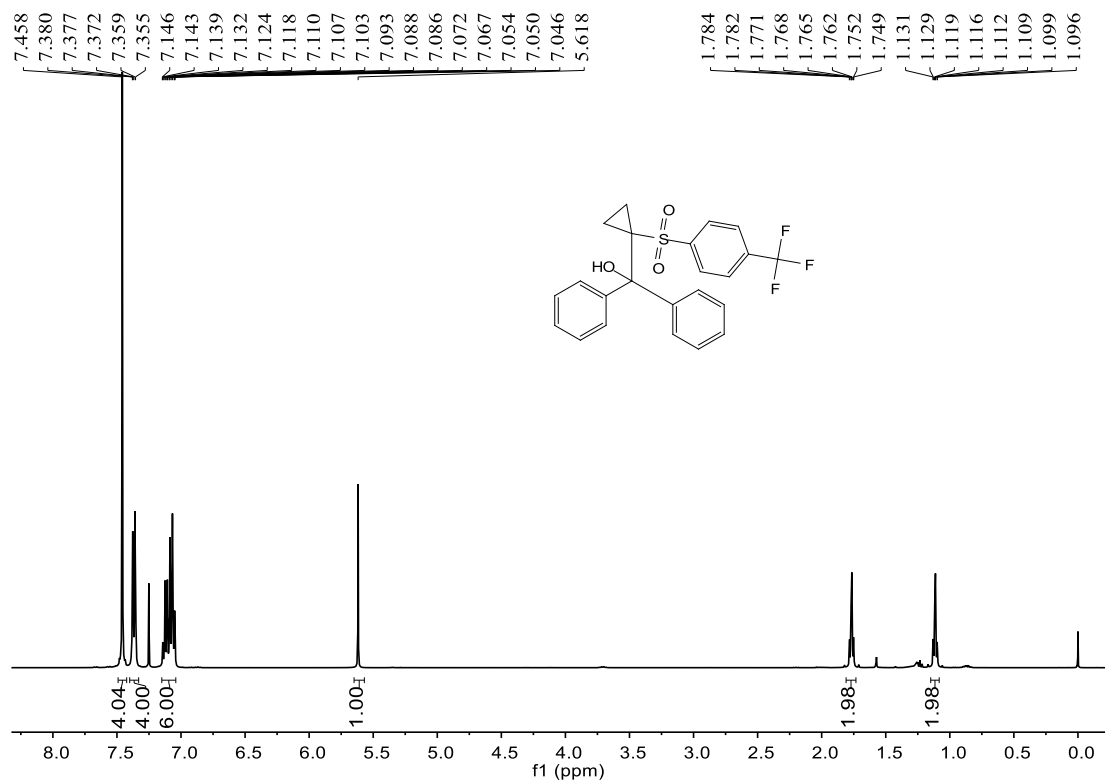

<sup>1</sup>H NMR and <sup>13</sup>C NMR spectra of compound **3aj**

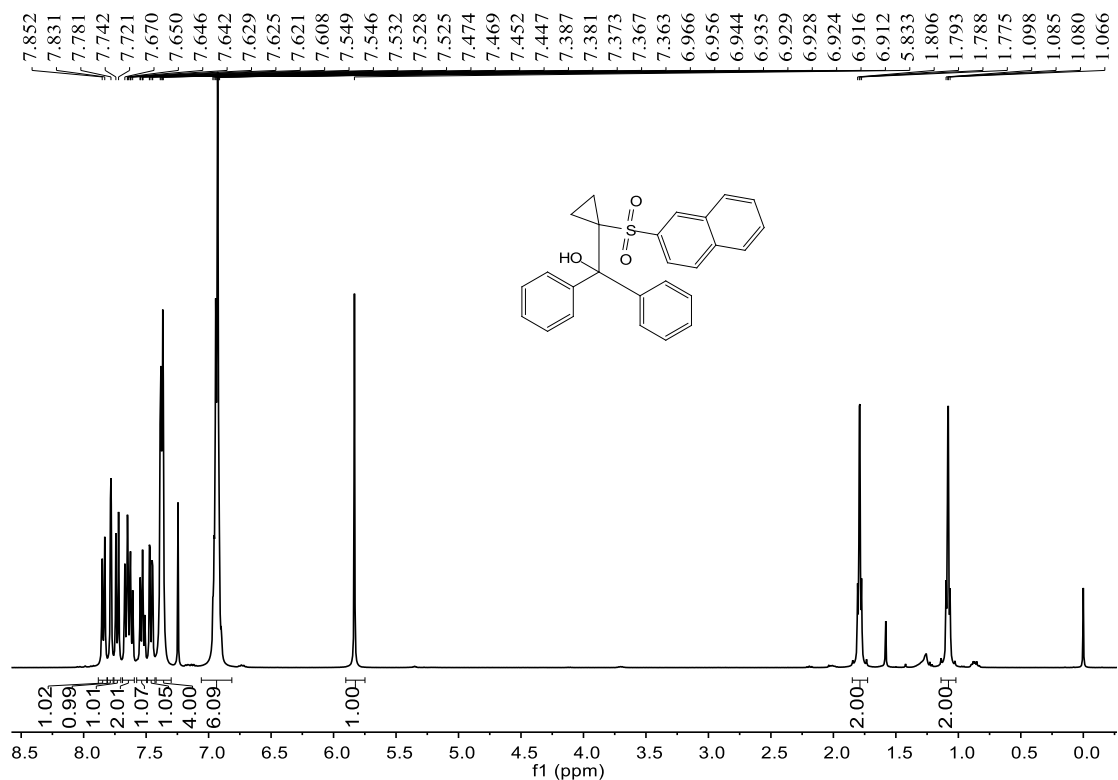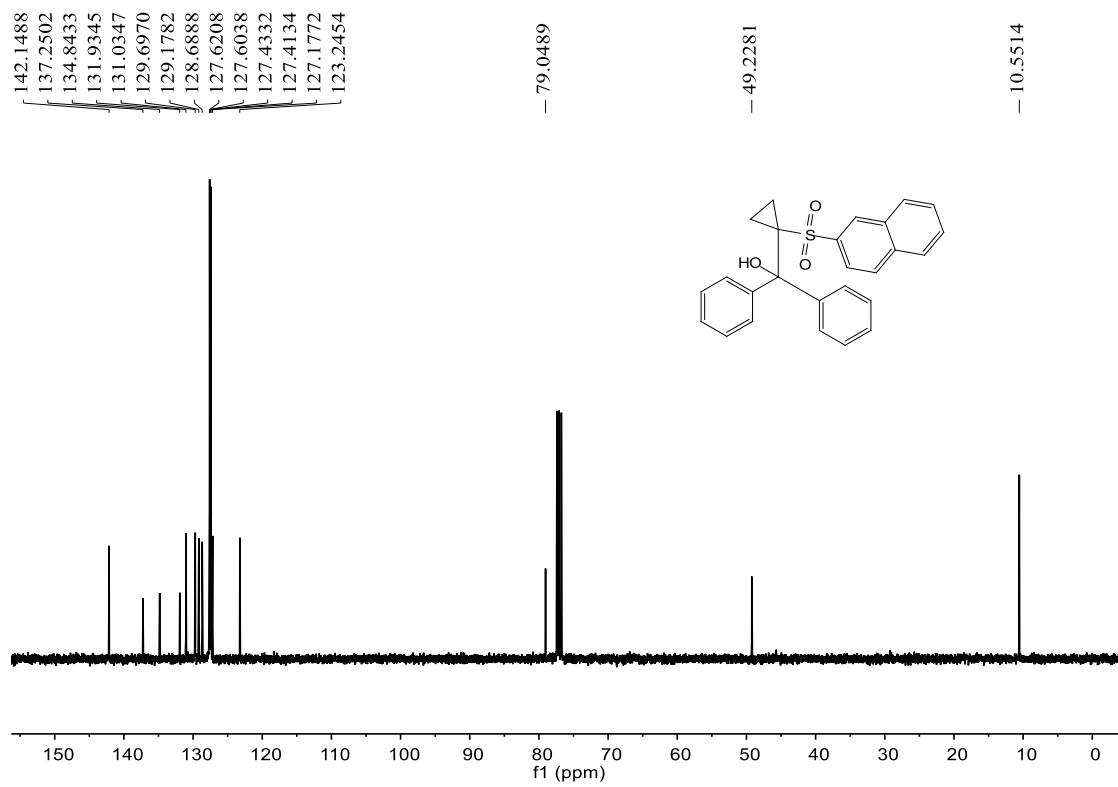

<sup>1</sup>H NMR and <sup>13</sup>C NMR spectra of compound **3ak**

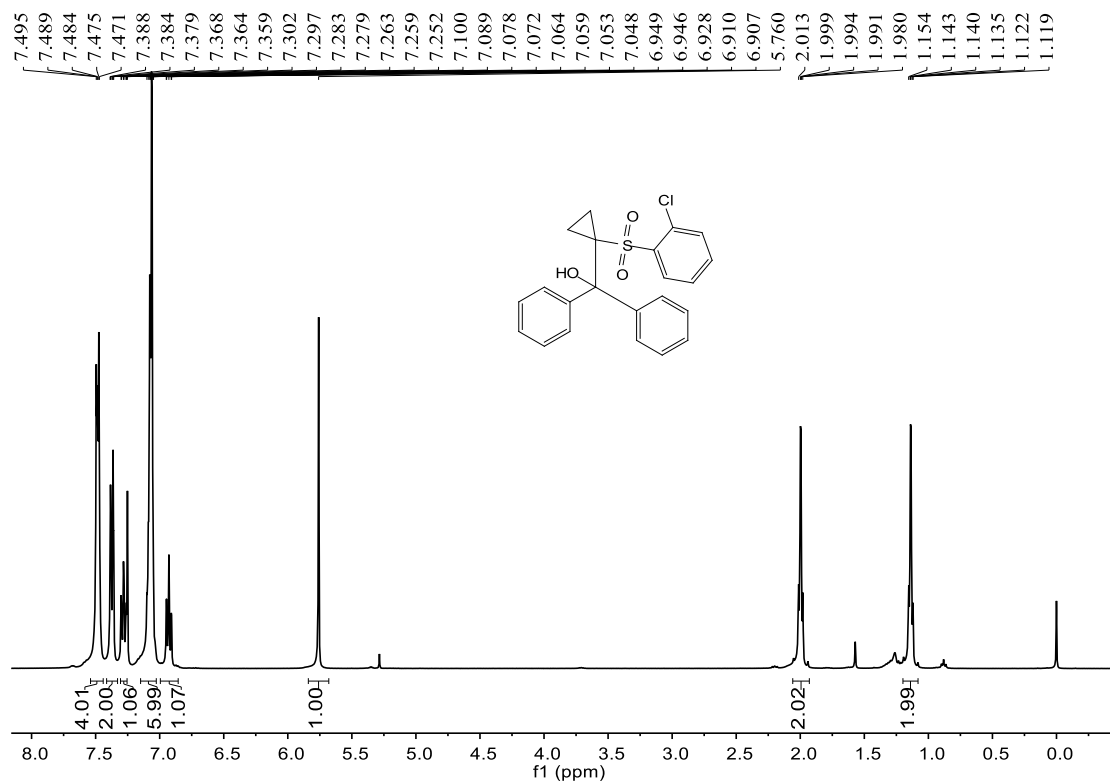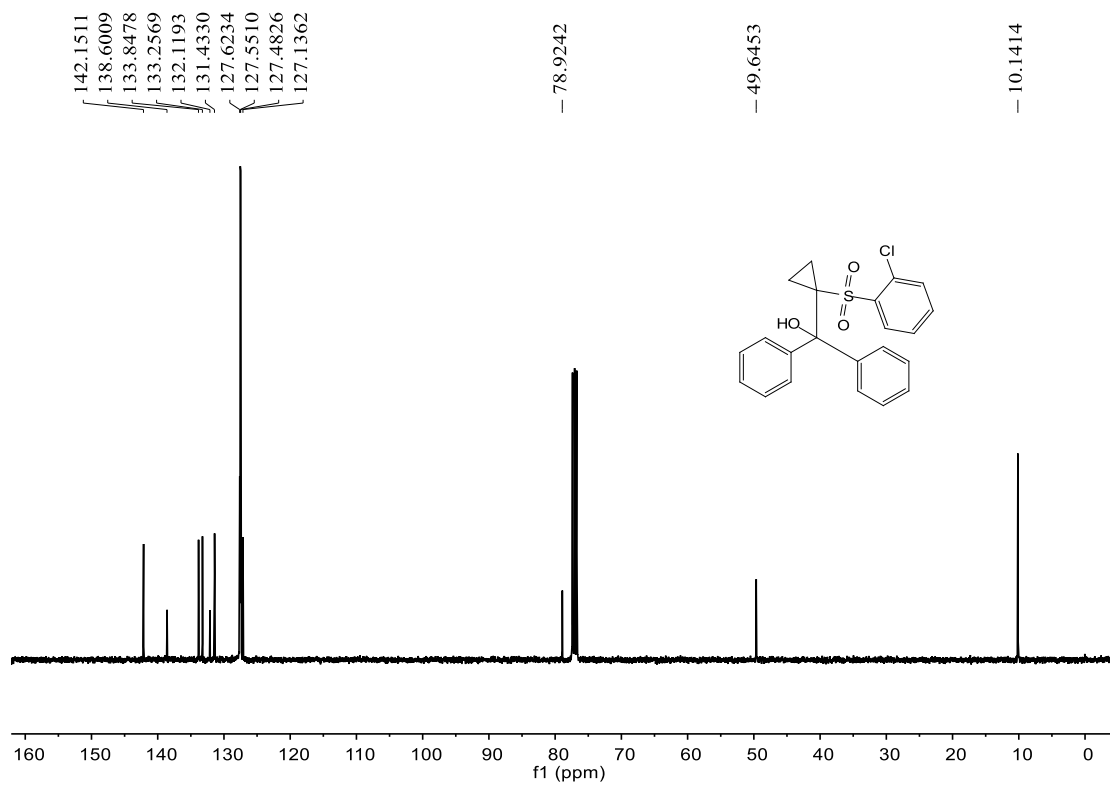

<sup>1</sup>H NMR and <sup>13</sup>C NMR spectra of compound **3al**

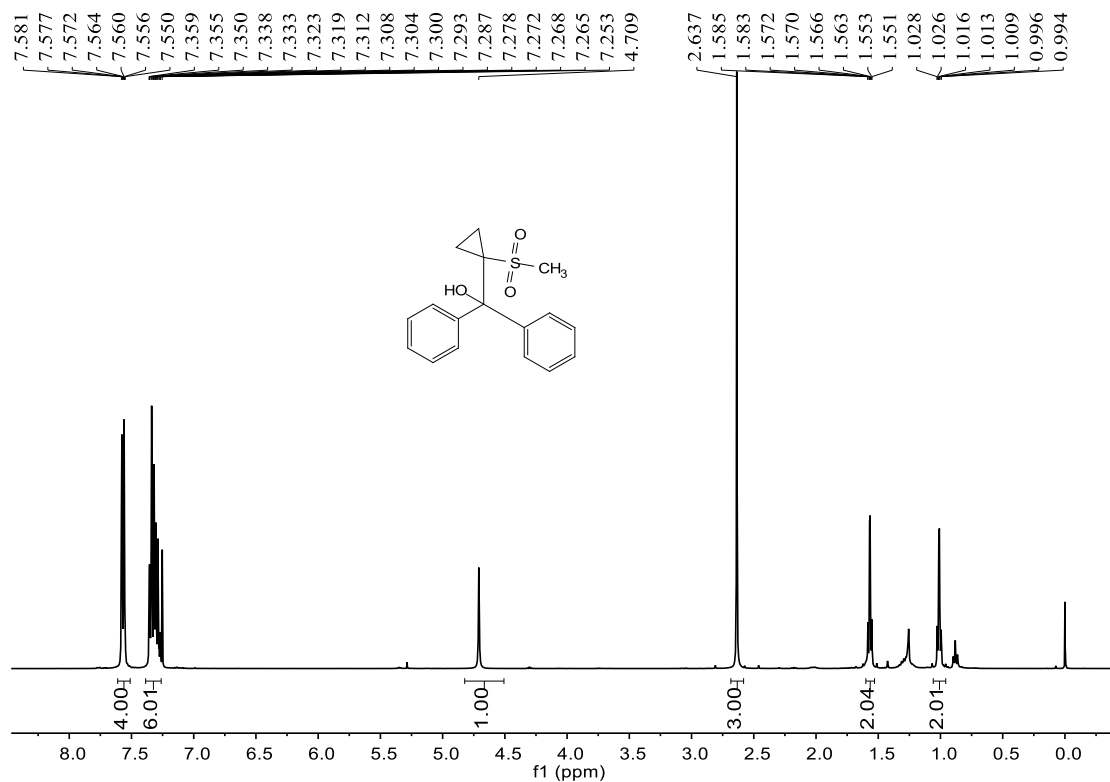

- 143.1621

{ 128.0438  
127.9672  
127.9454

- 78.9484

- 47.7606

- 43.1352

- 10.5083

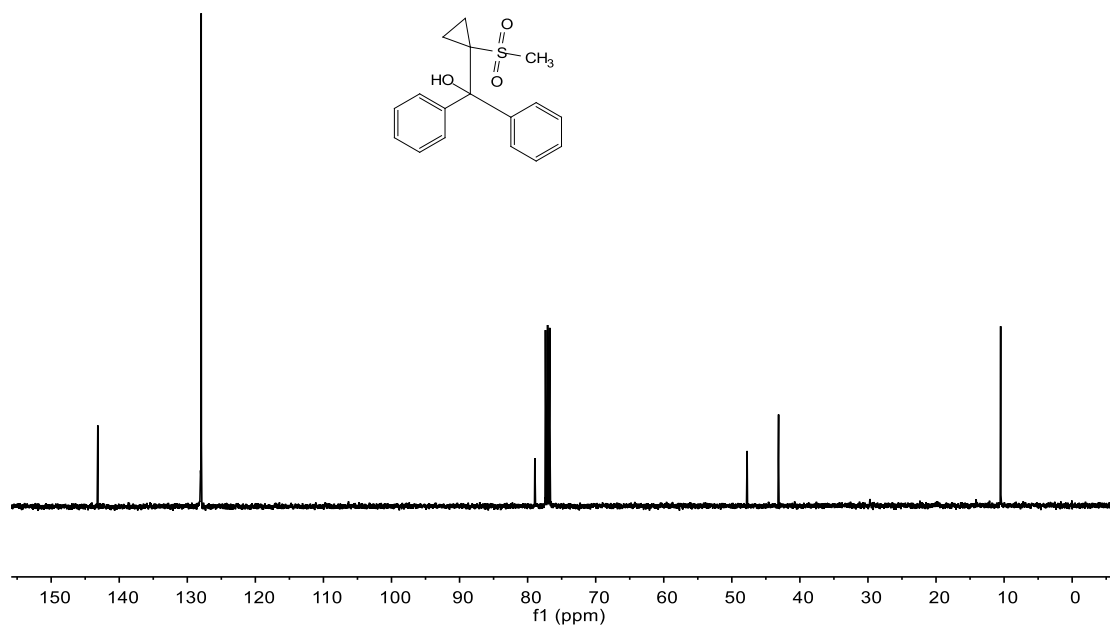

<sup>1</sup>H NMR and <sup>13</sup>C NMR spectra of compound **3gd**

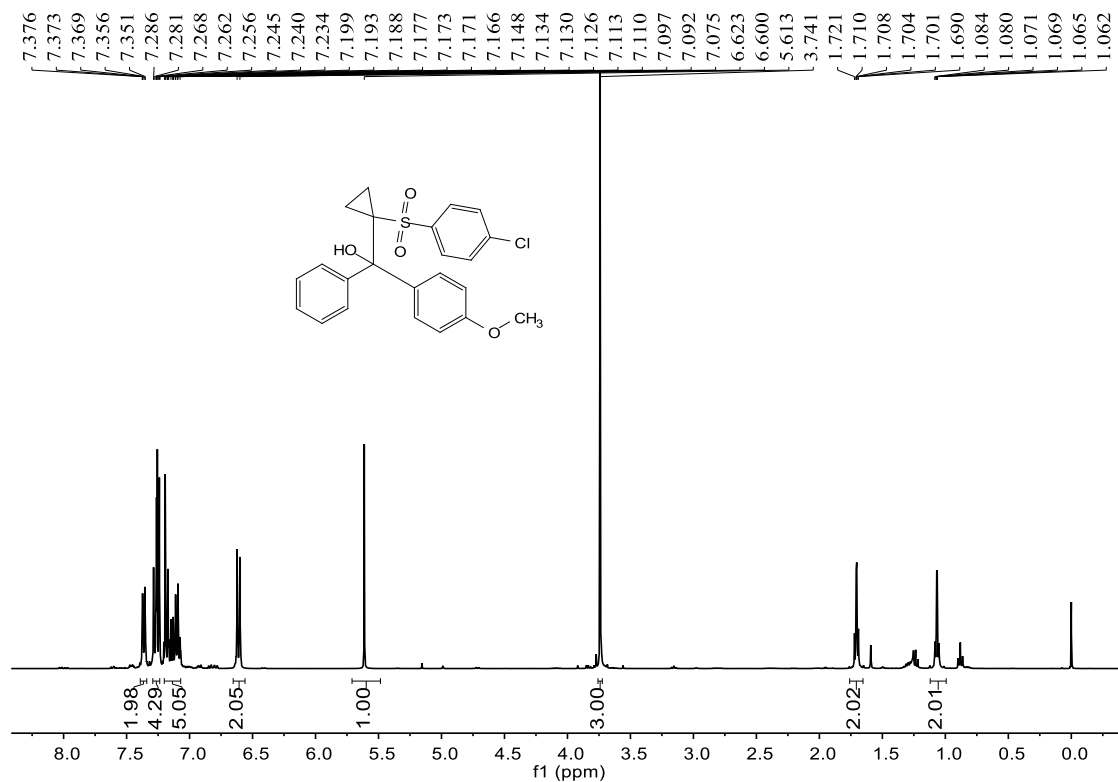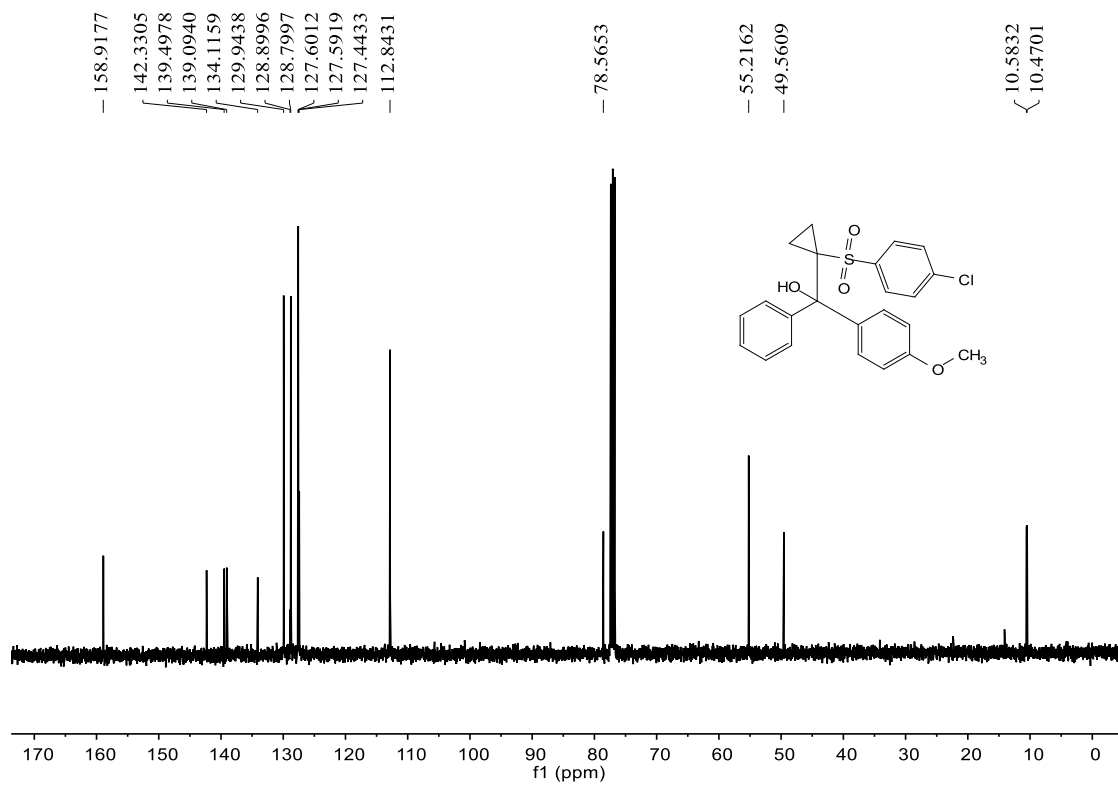

<sup>1</sup>H NMR and <sup>13</sup>C NMR spectra of compound **3kb**

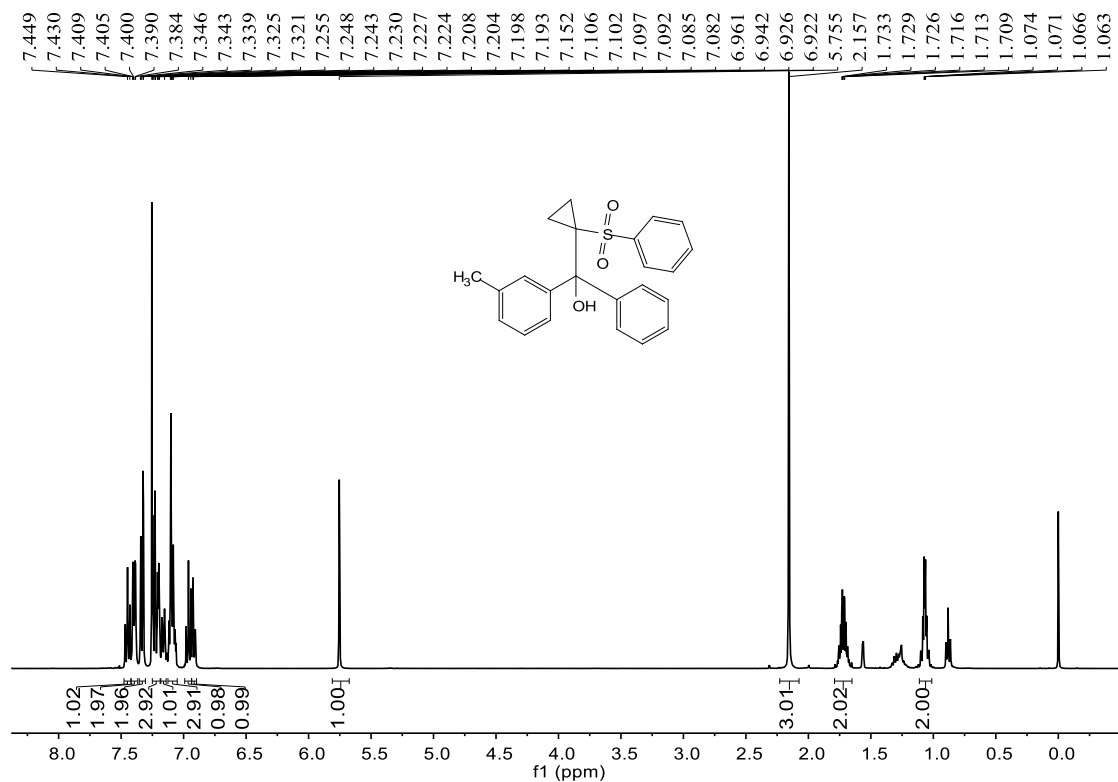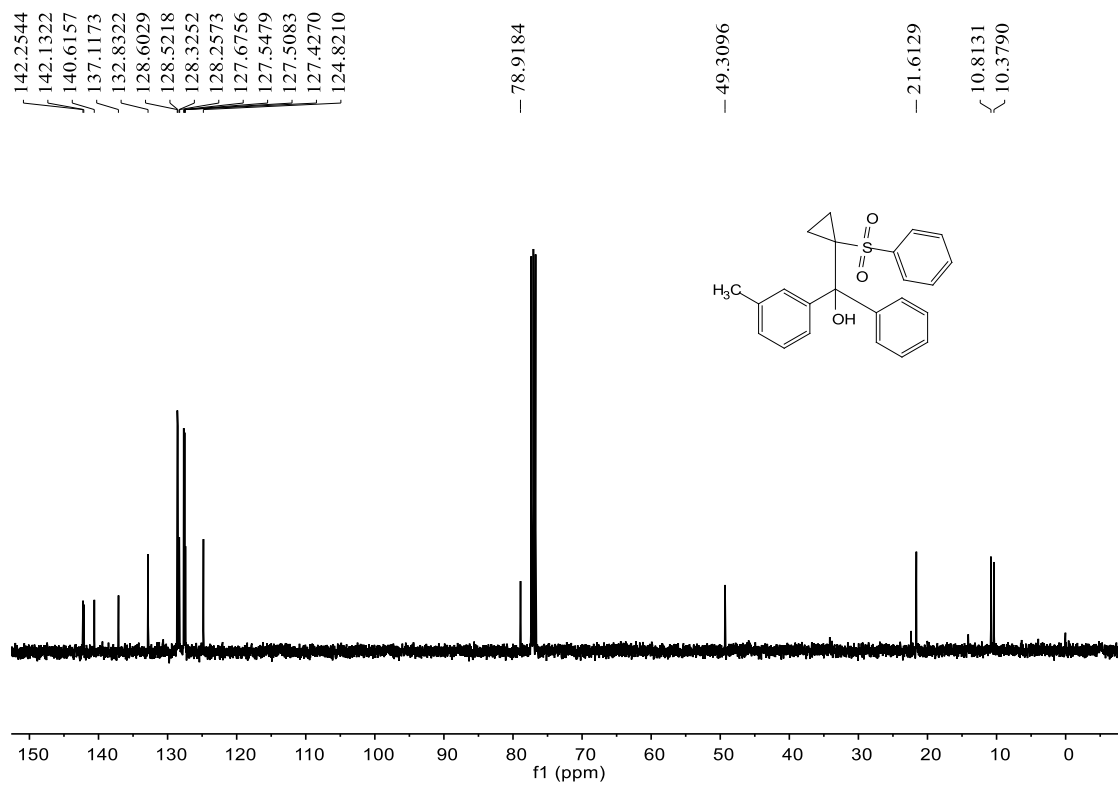

$^1\text{H}$  NMR and  $^{13}\text{C}$  NMR spectra of compound **3kh**

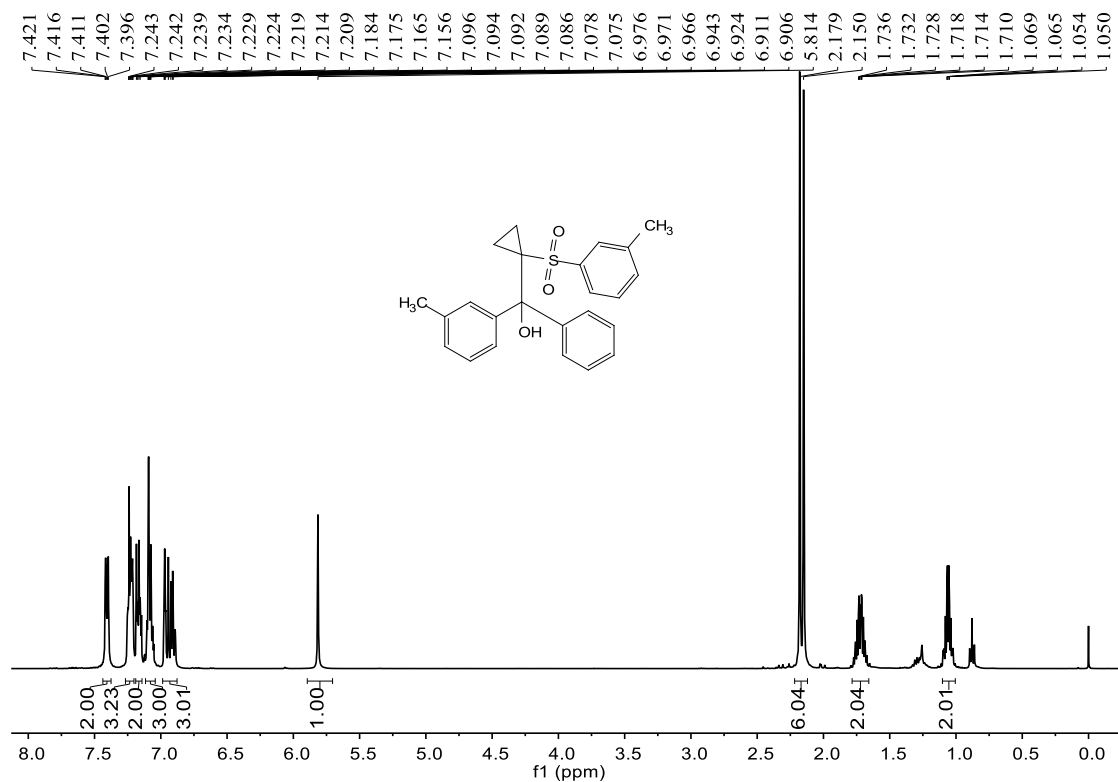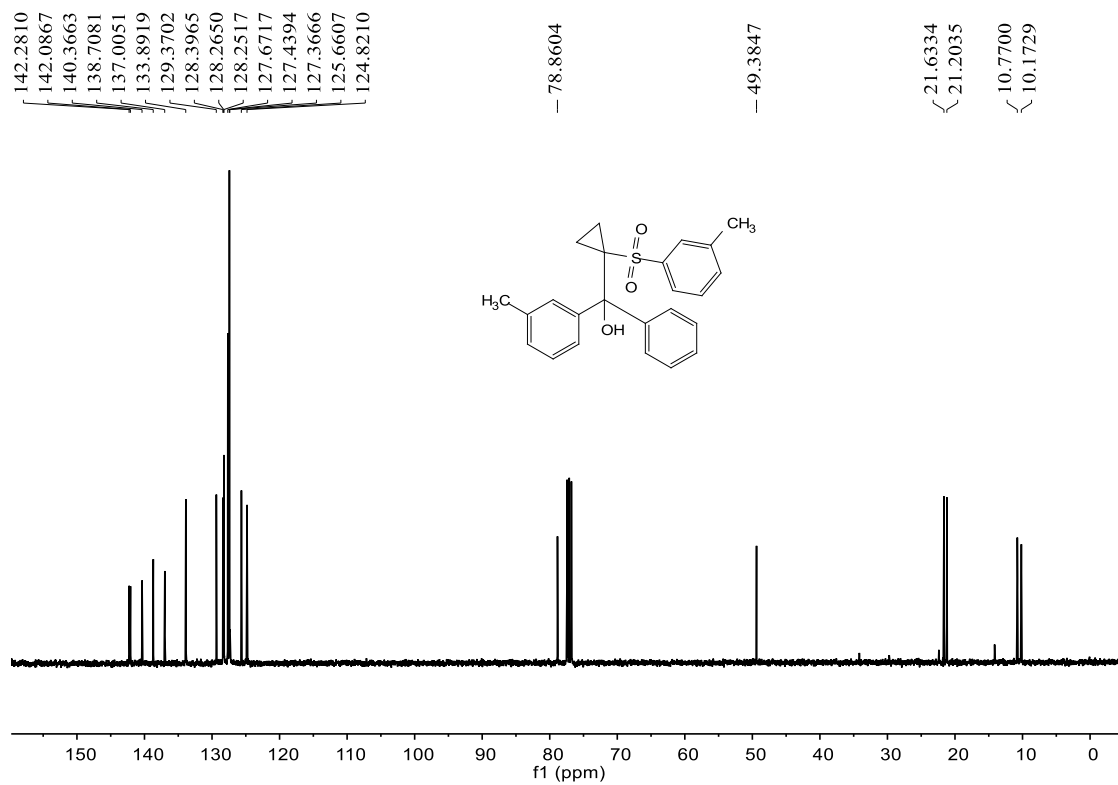

<sup>1</sup>H NMR and <sup>13</sup>C NMR spectra of compound **3kg**

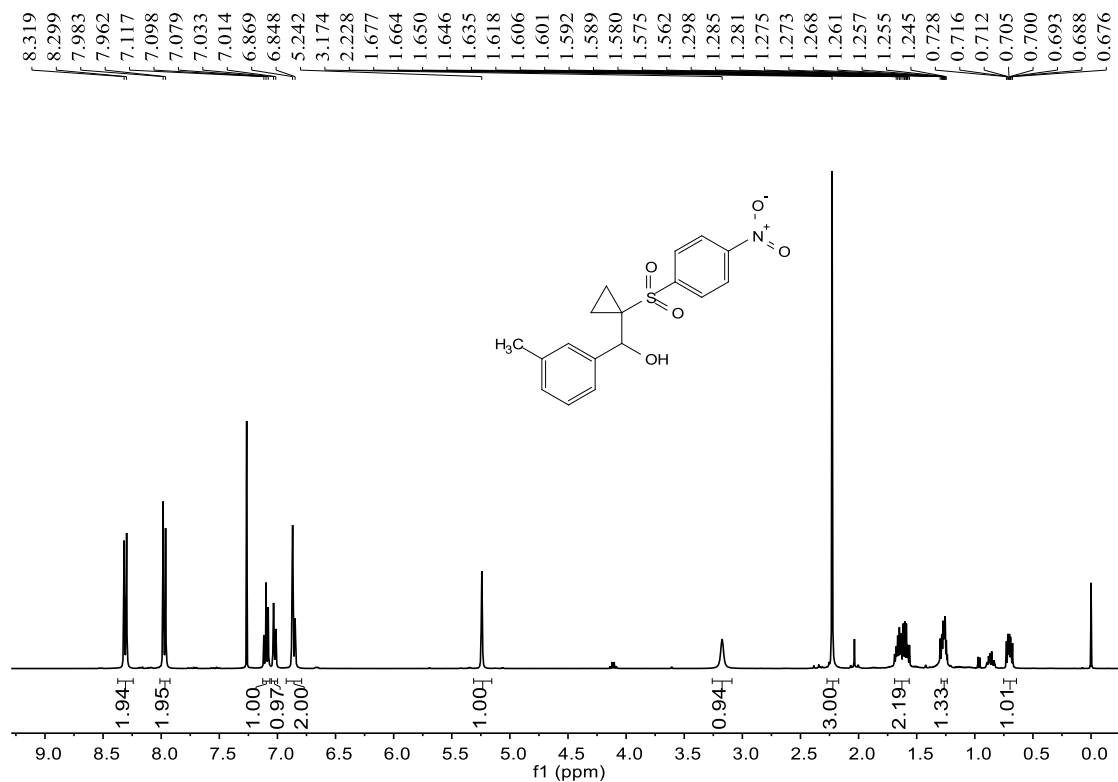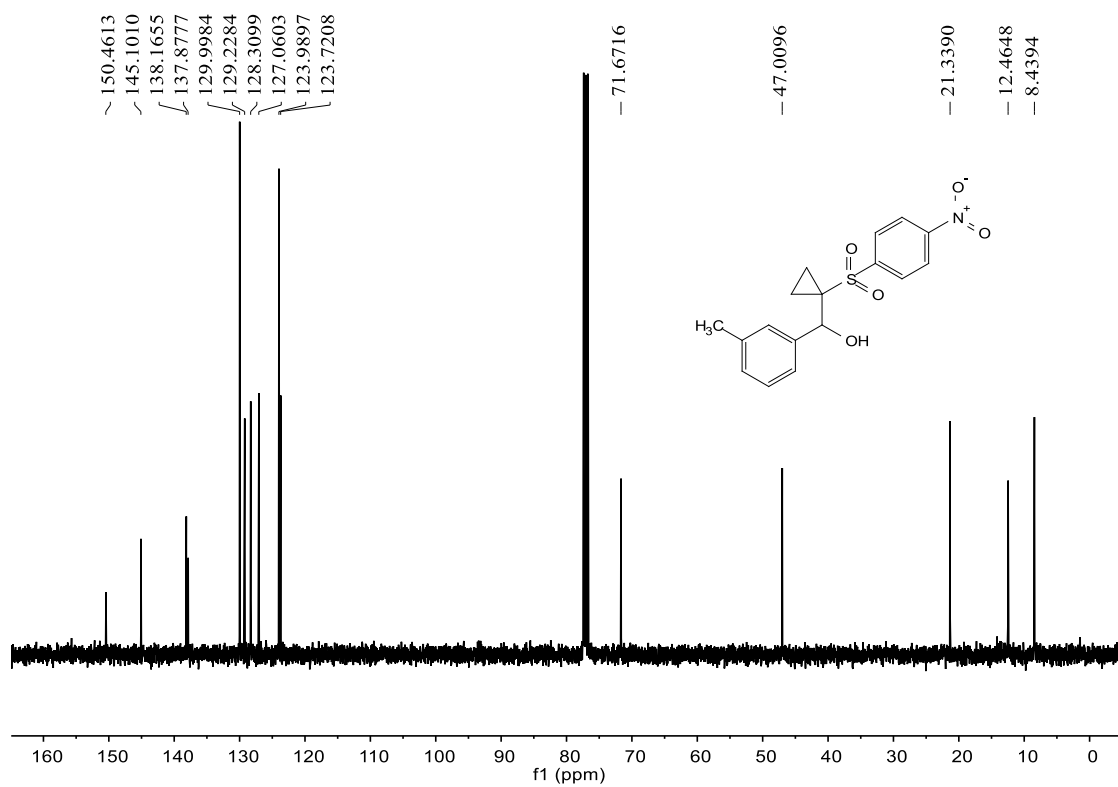



<sup>1</sup>H NMR and <sup>13</sup>C NMR spectra of compound **3nb**

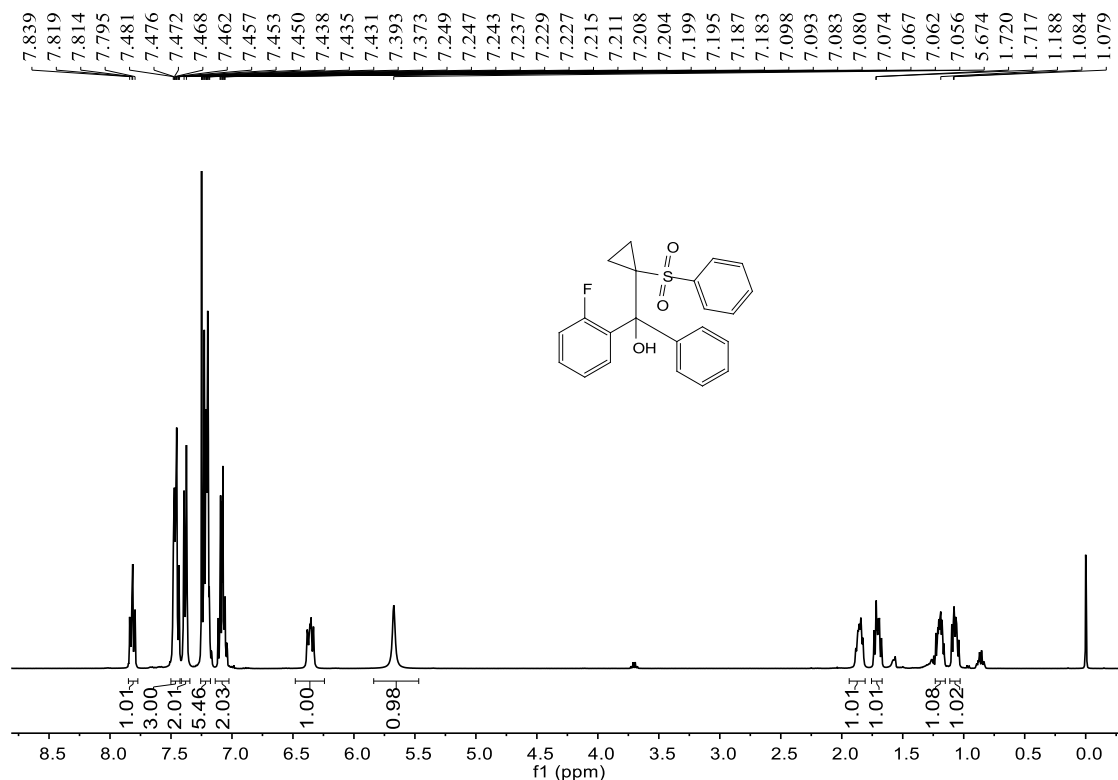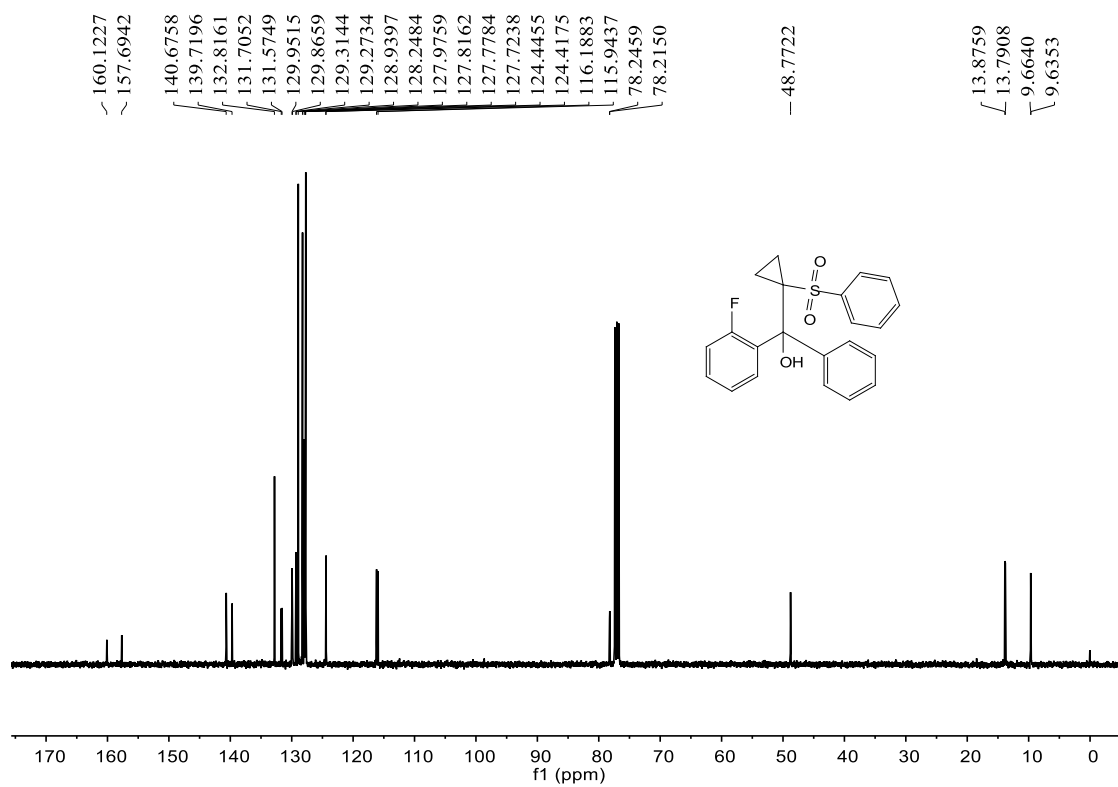

<sup>1</sup>H NMR and <sup>13</sup>C NMR spectra of compound **3nh**

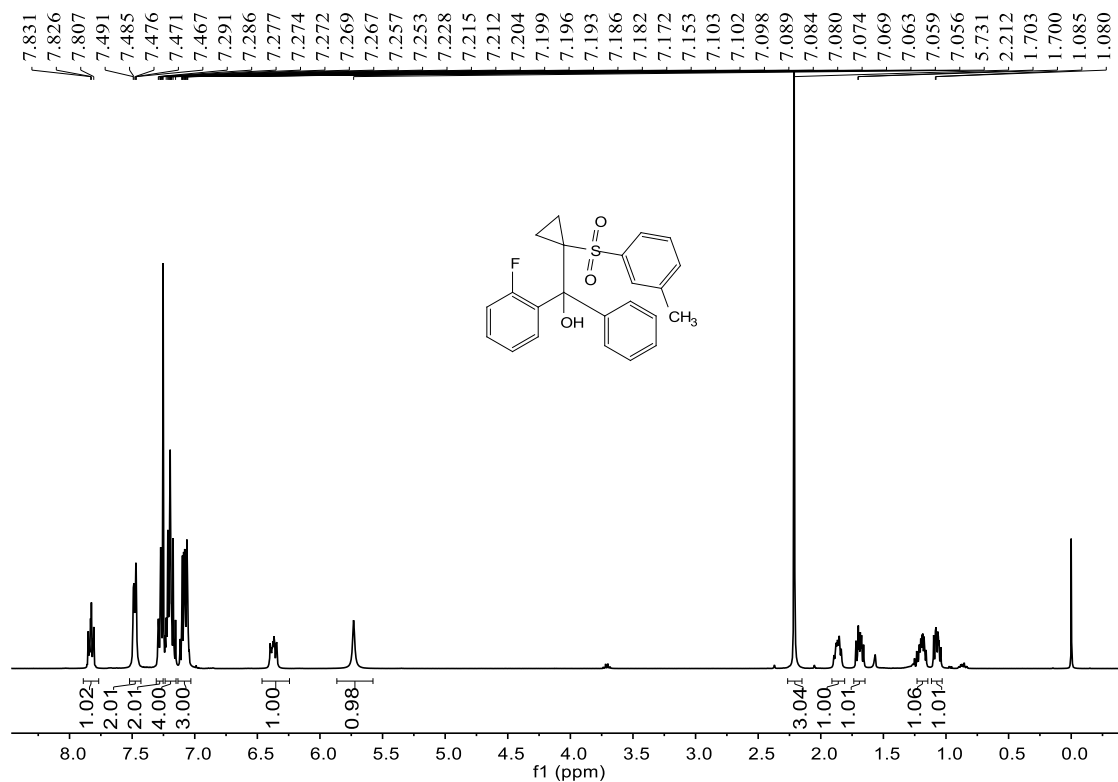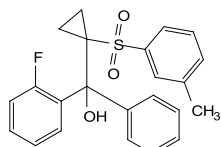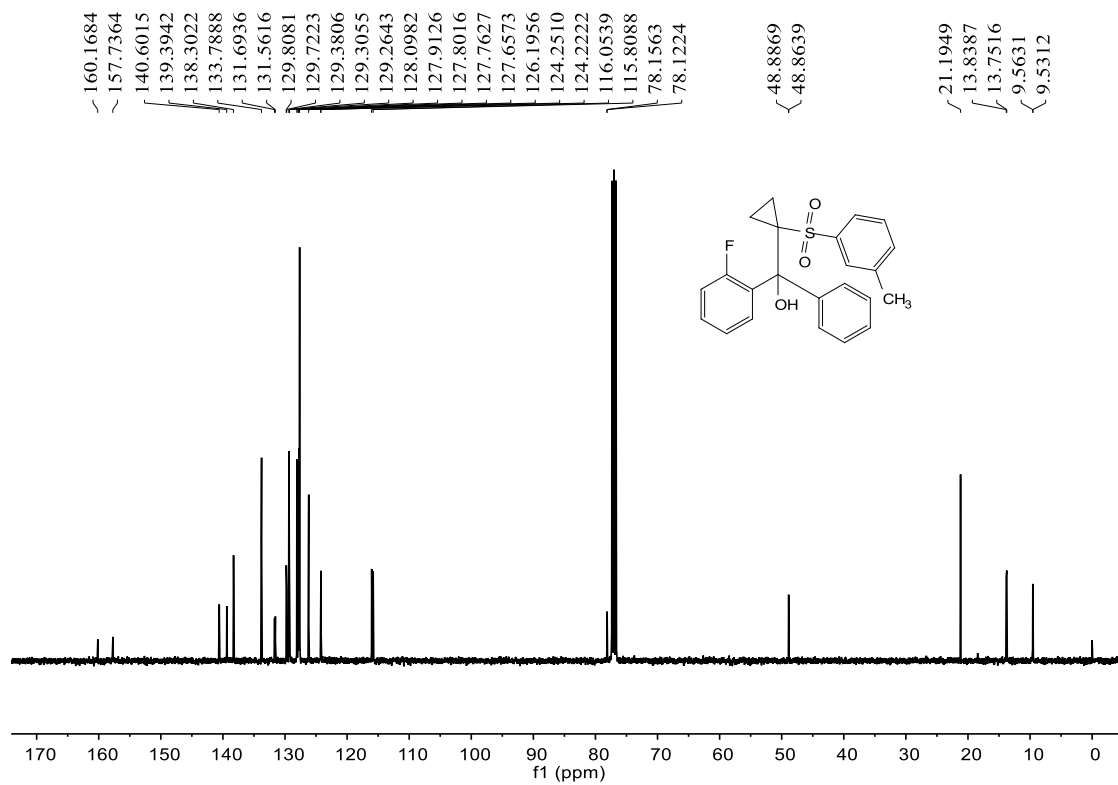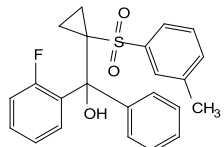

<sup>1</sup>H NMR and <sup>13</sup>C NMR spectra of compound **4ya**

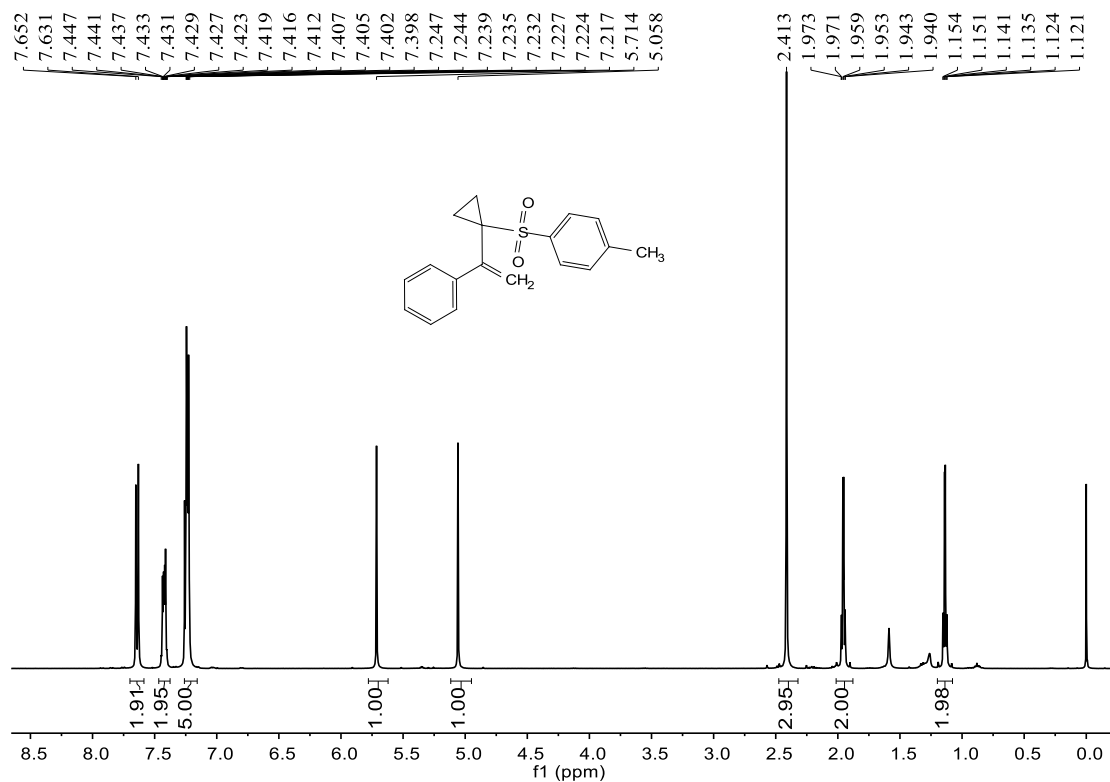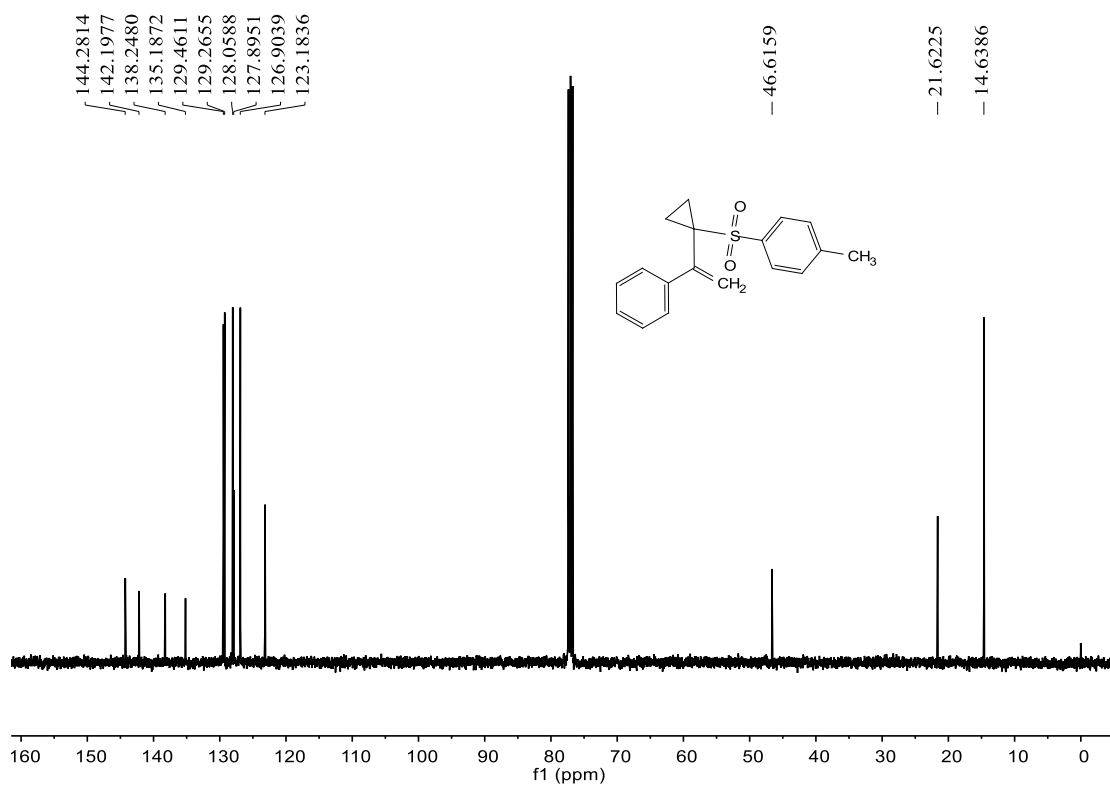

<sup>1</sup>H NMR and <sup>13</sup>C NMR spectra of compound **4yb**

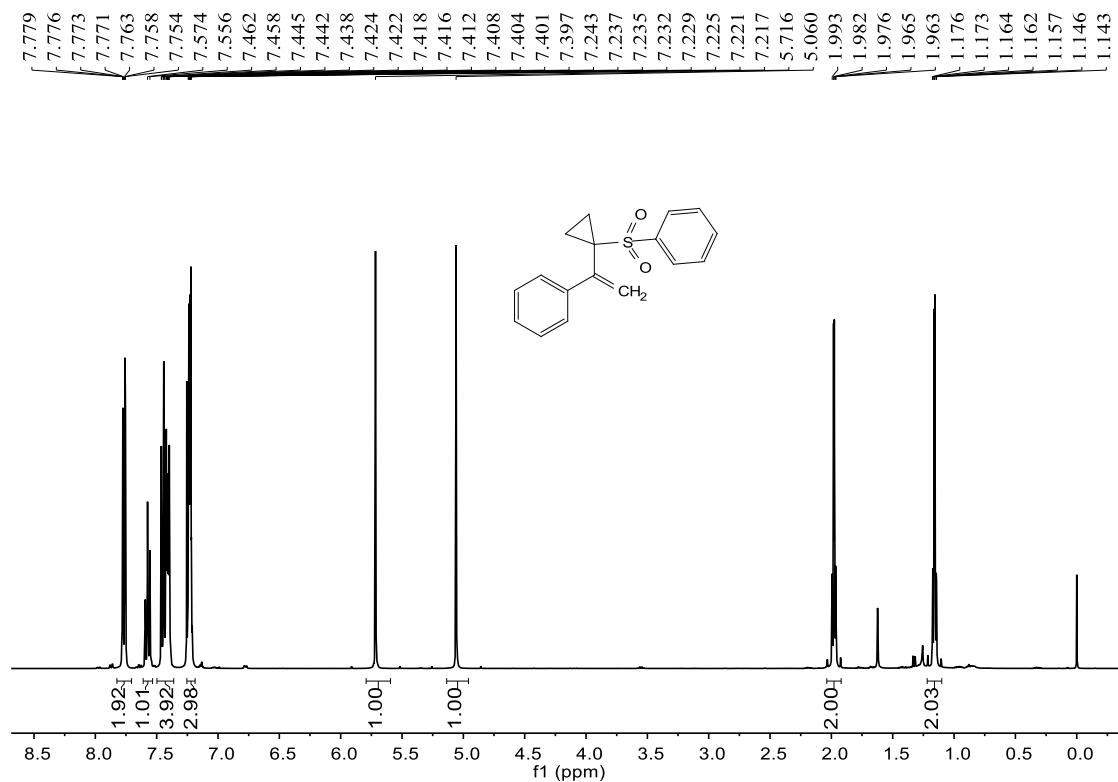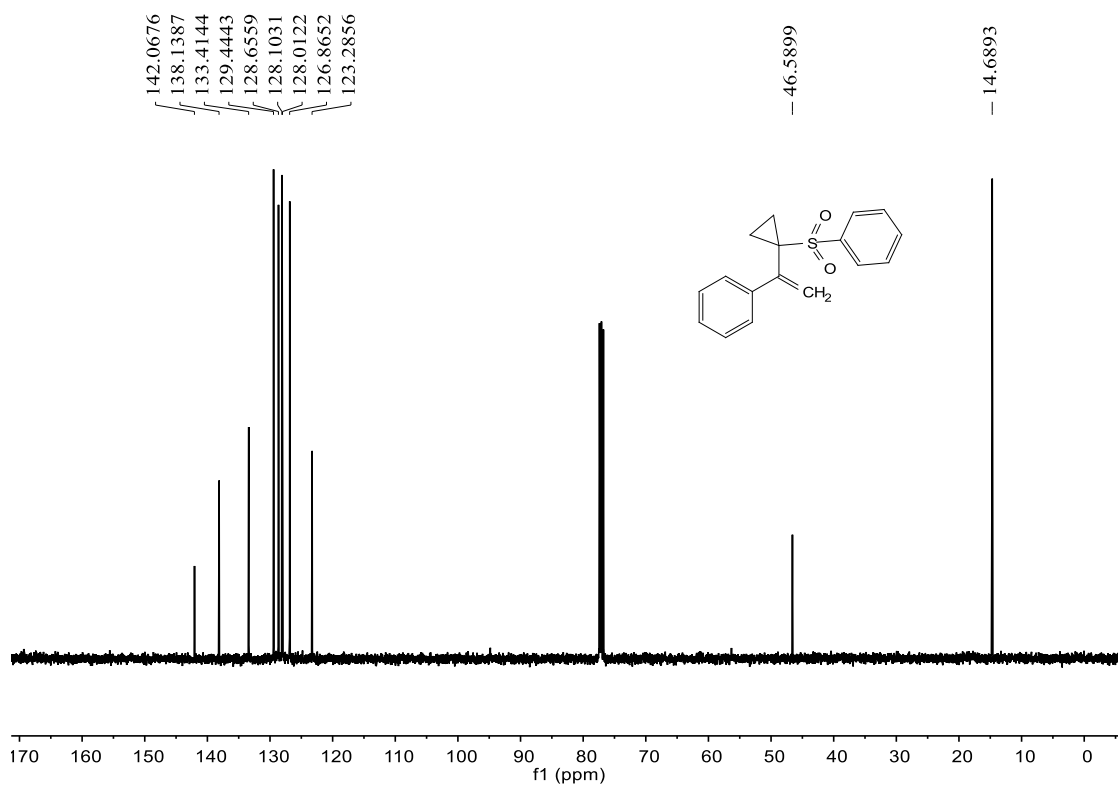

$^1\text{H}$  NMR and  $^{13}\text{C}$  NMR spectra of compound **4yh**

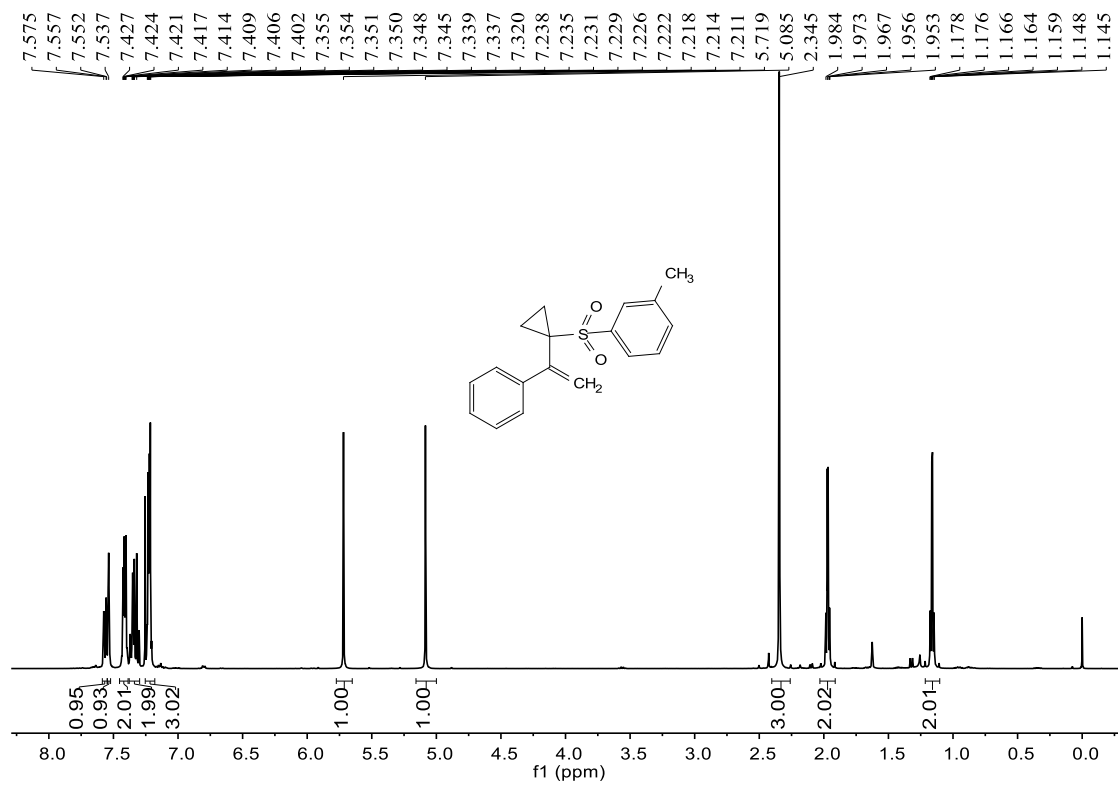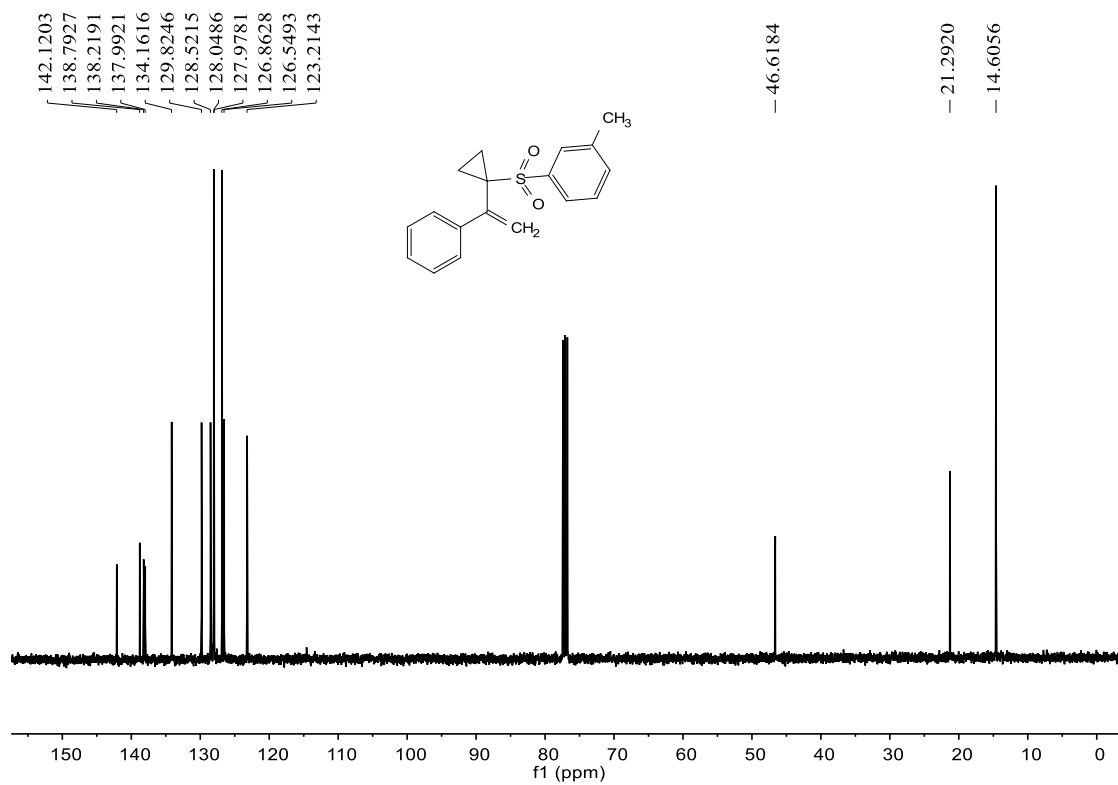

<sup>1</sup>H NMR and <sup>13</sup>C NMR spectra of compound **4za**

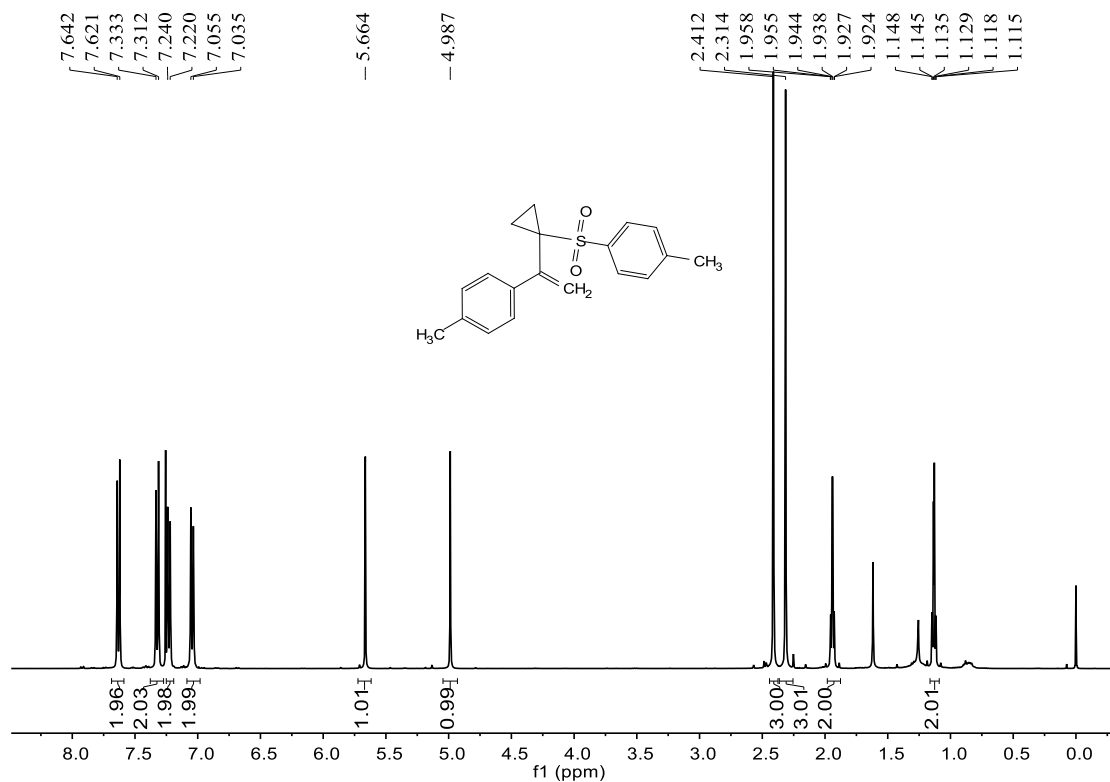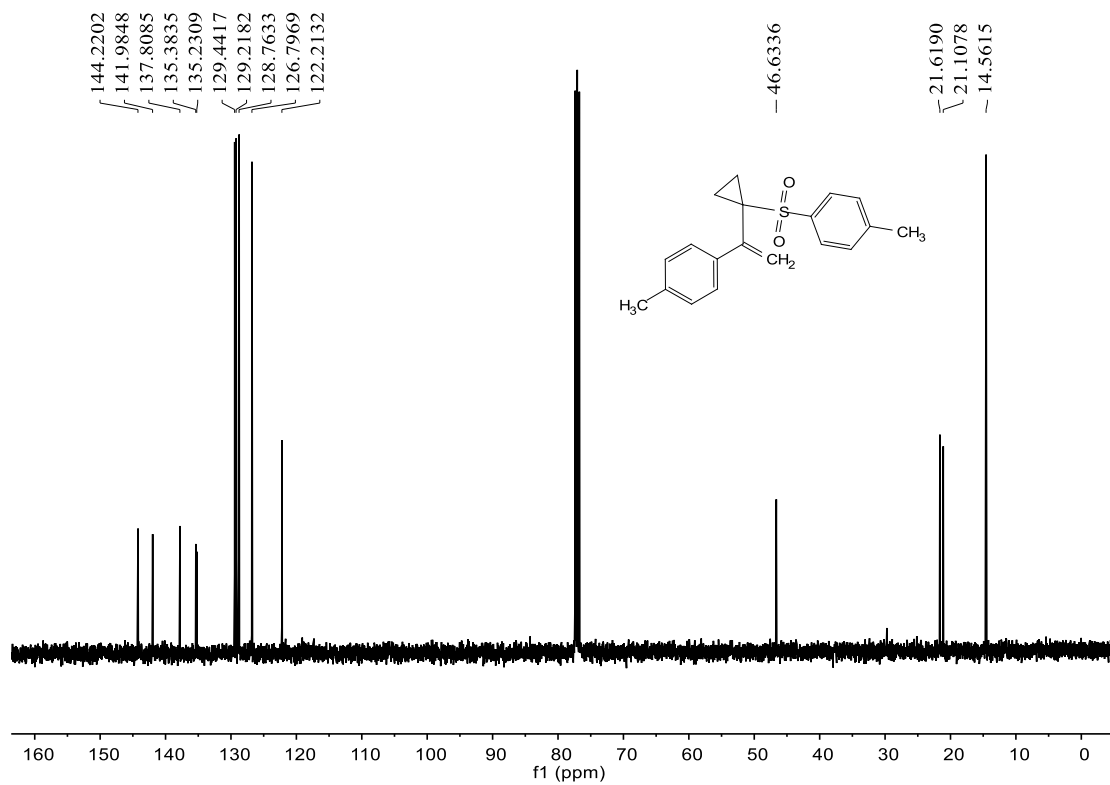

<sup>1</sup>H NMR and <sup>13</sup>C NMR spectra of compound **4aaa**

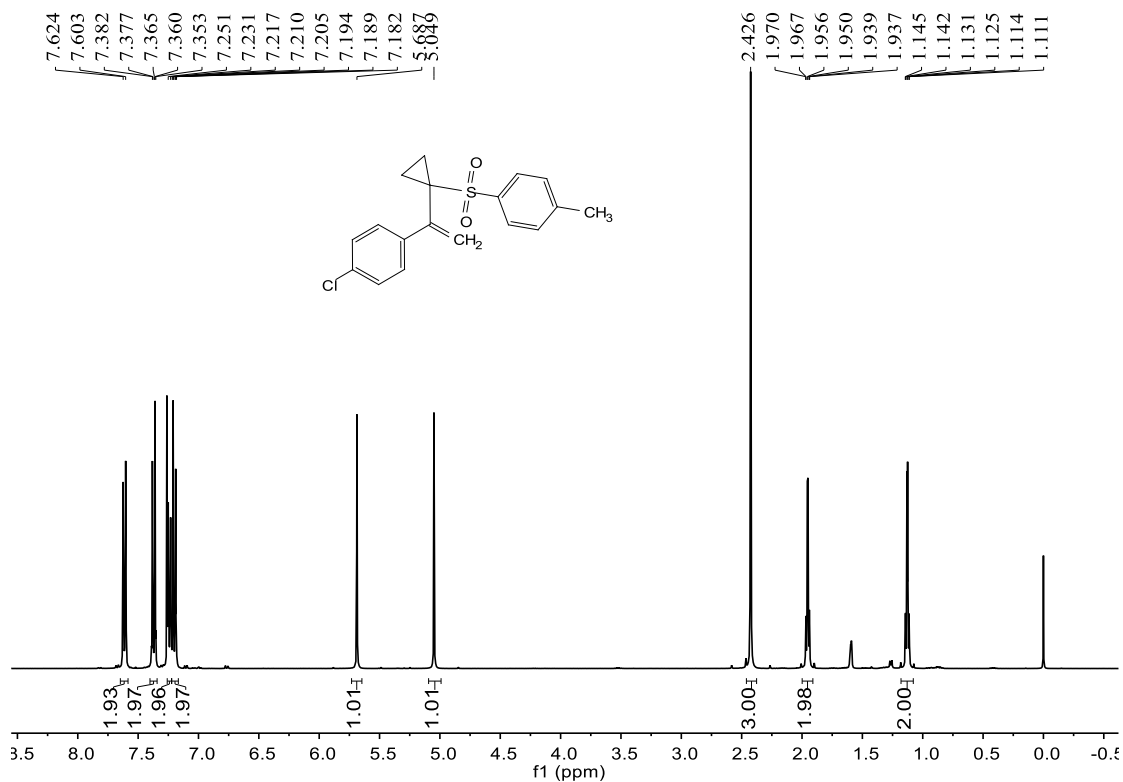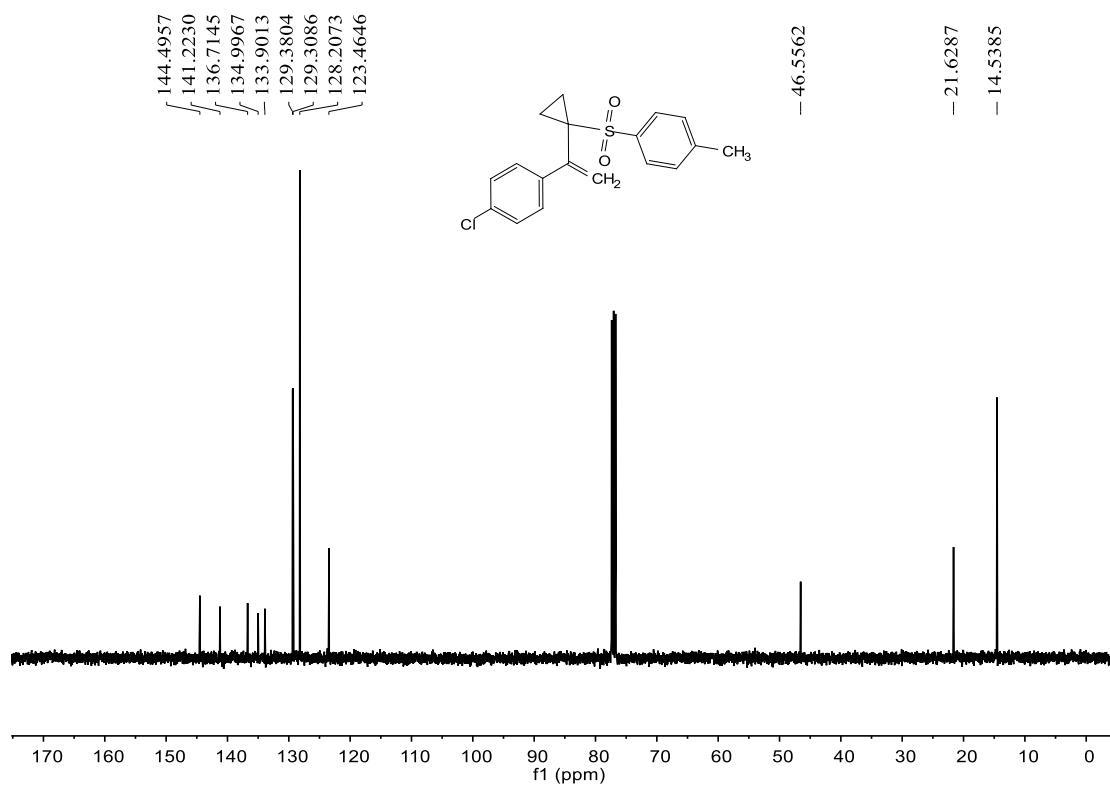

<sup>1</sup>H NMR and <sup>13</sup>C NMR spectra of compound **4aba**

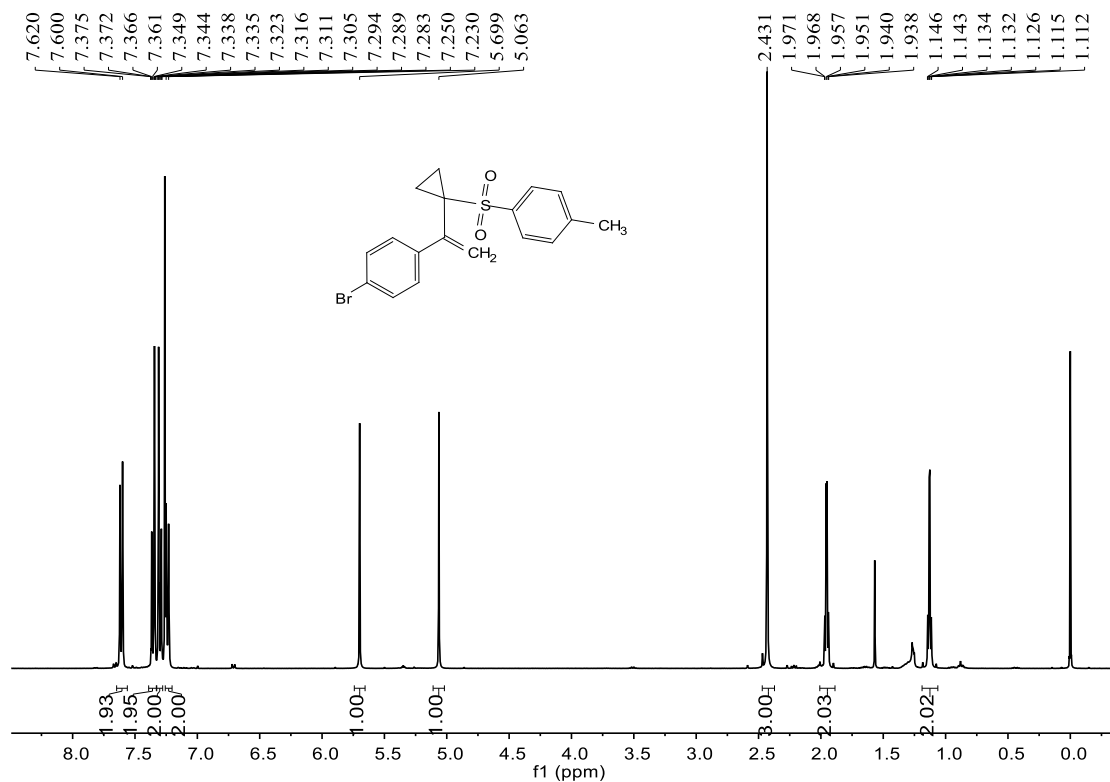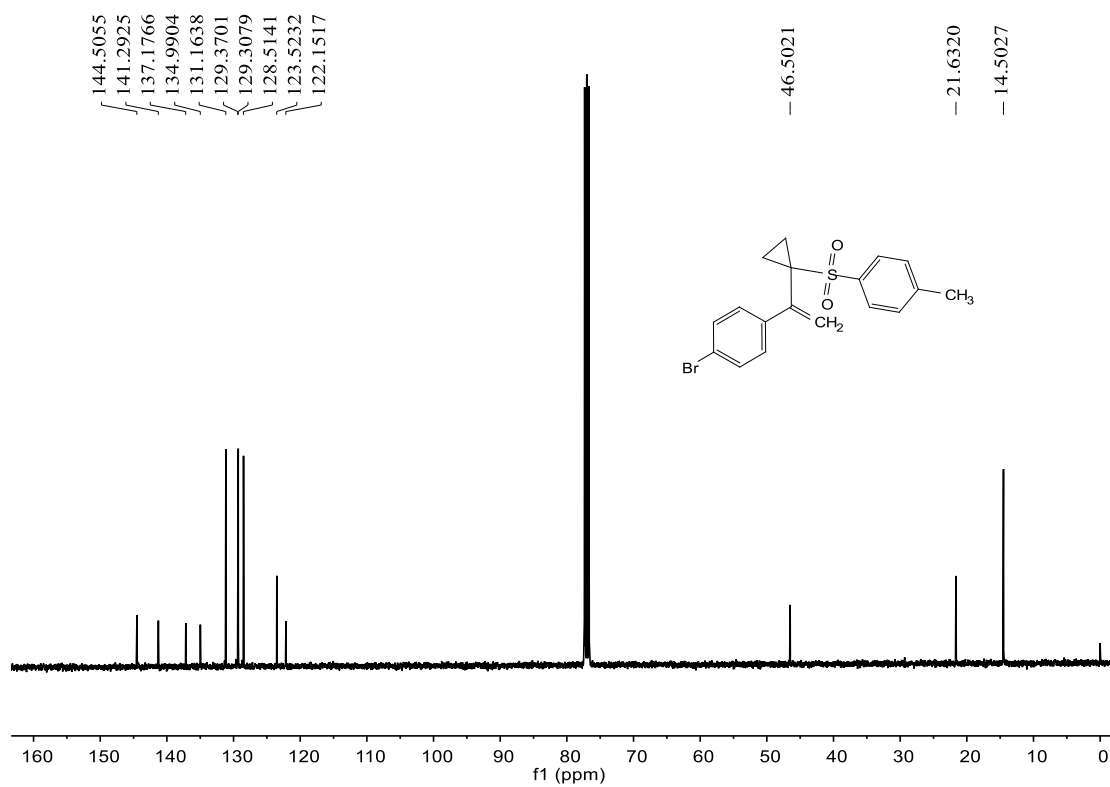



<sup>1</sup>H NMR and <sup>13</sup>C NMR spectra of compound **4aca**

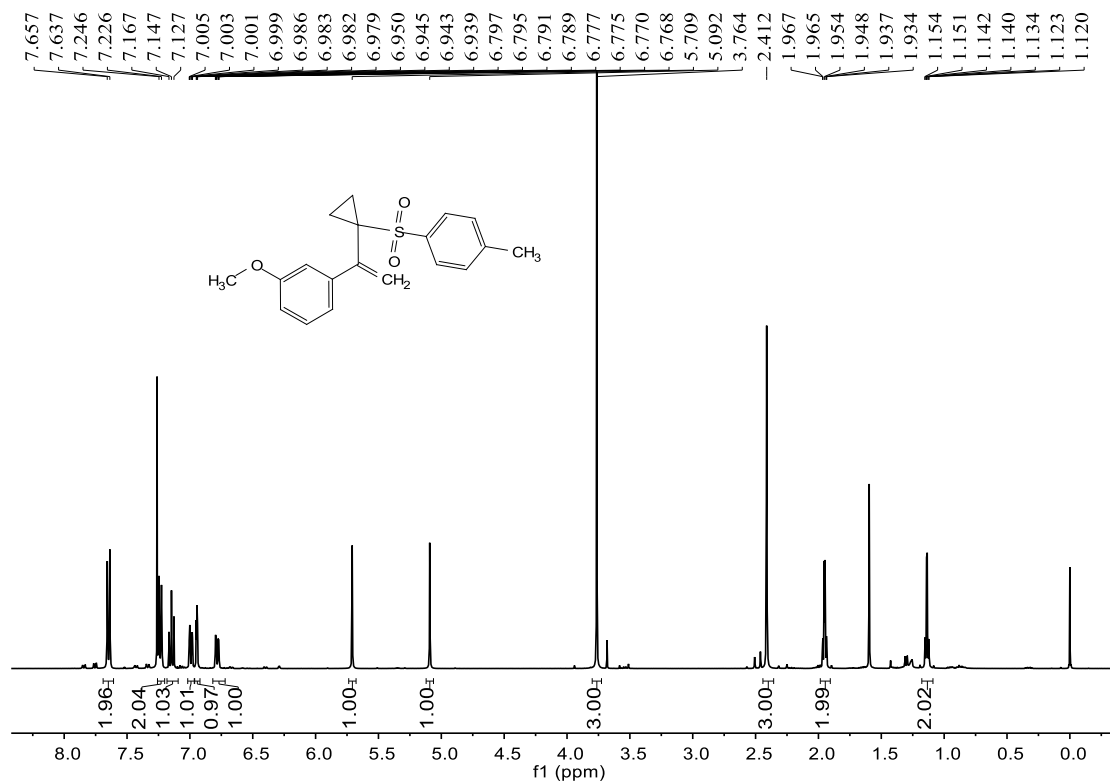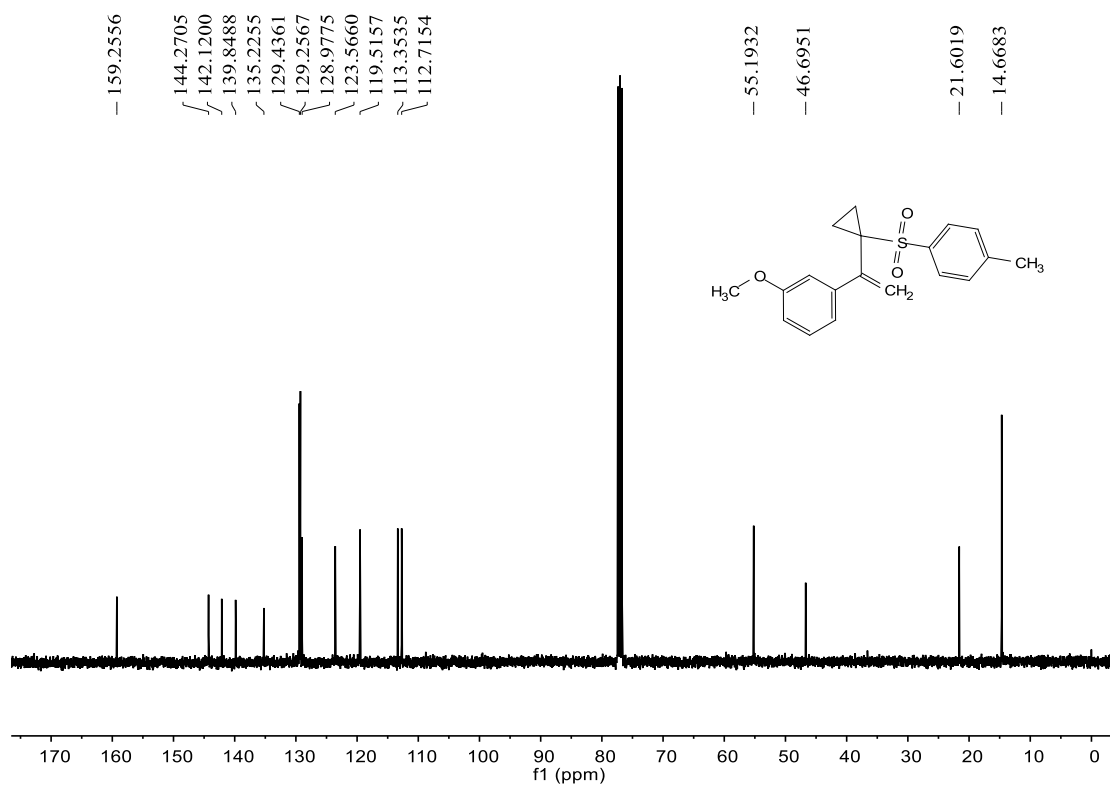

<sup>1</sup>H NMR and <sup>13</sup>C NMR spectra of compound **5aca**

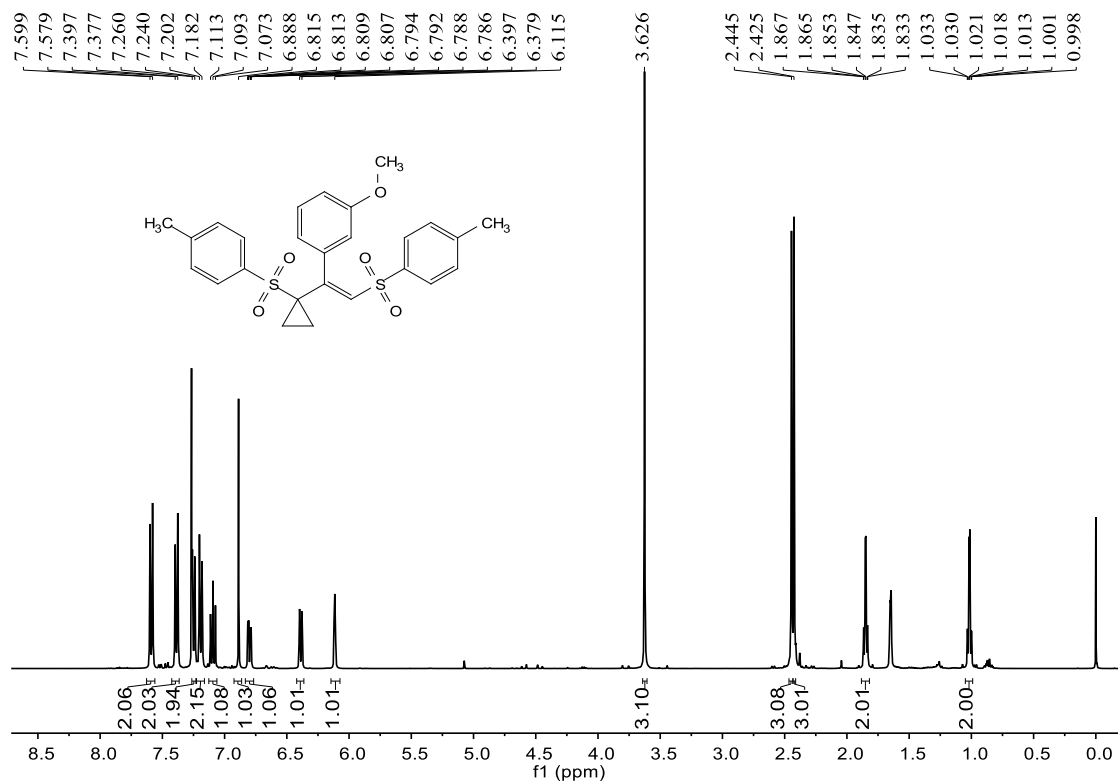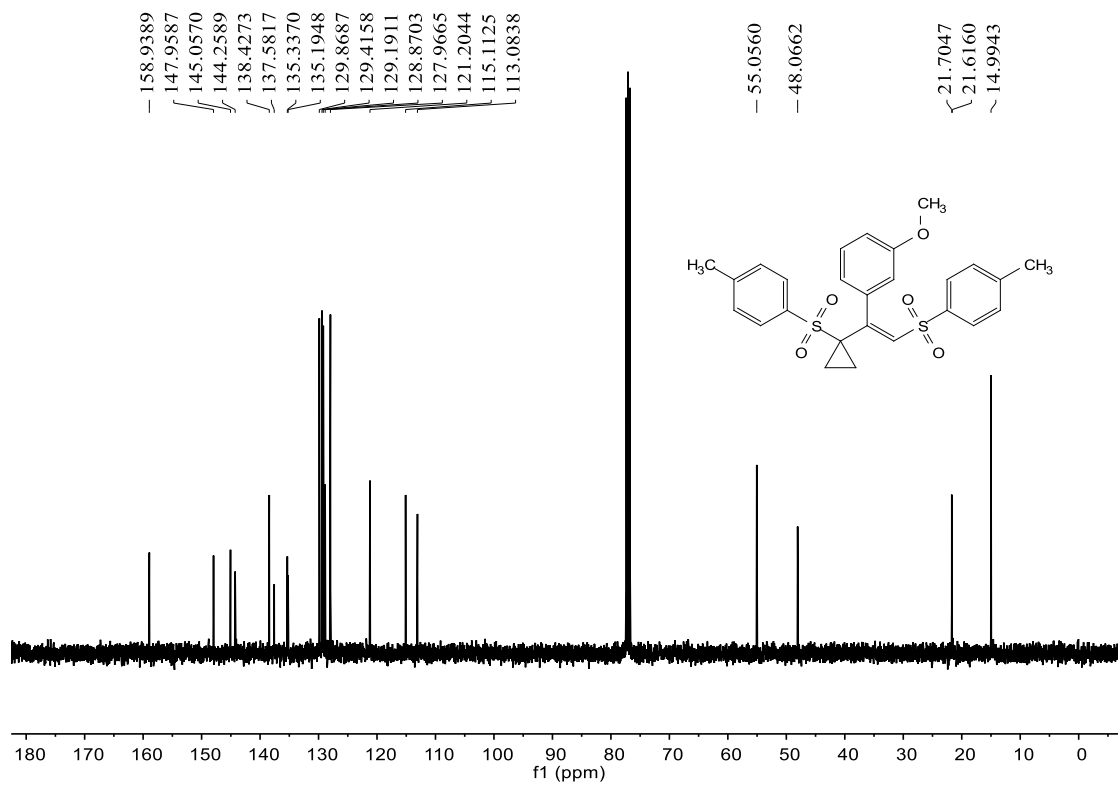

<sup>1</sup>H NMR and <sup>13</sup>C NMR spectra of compound **6aa**

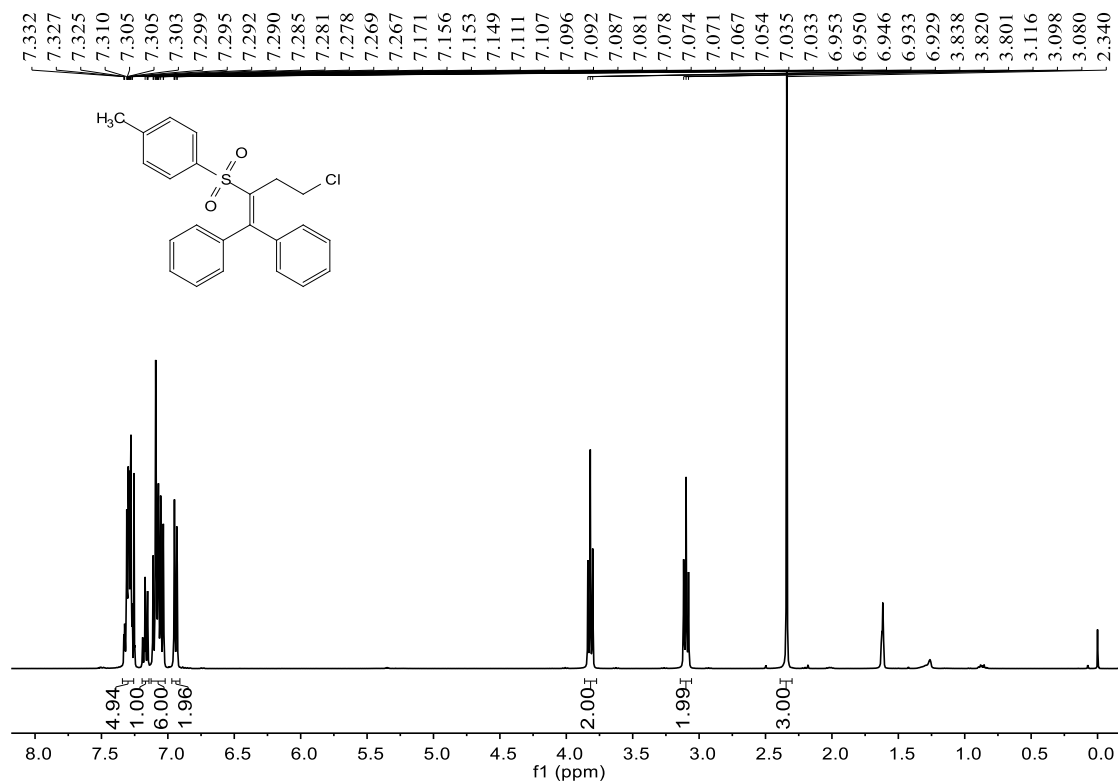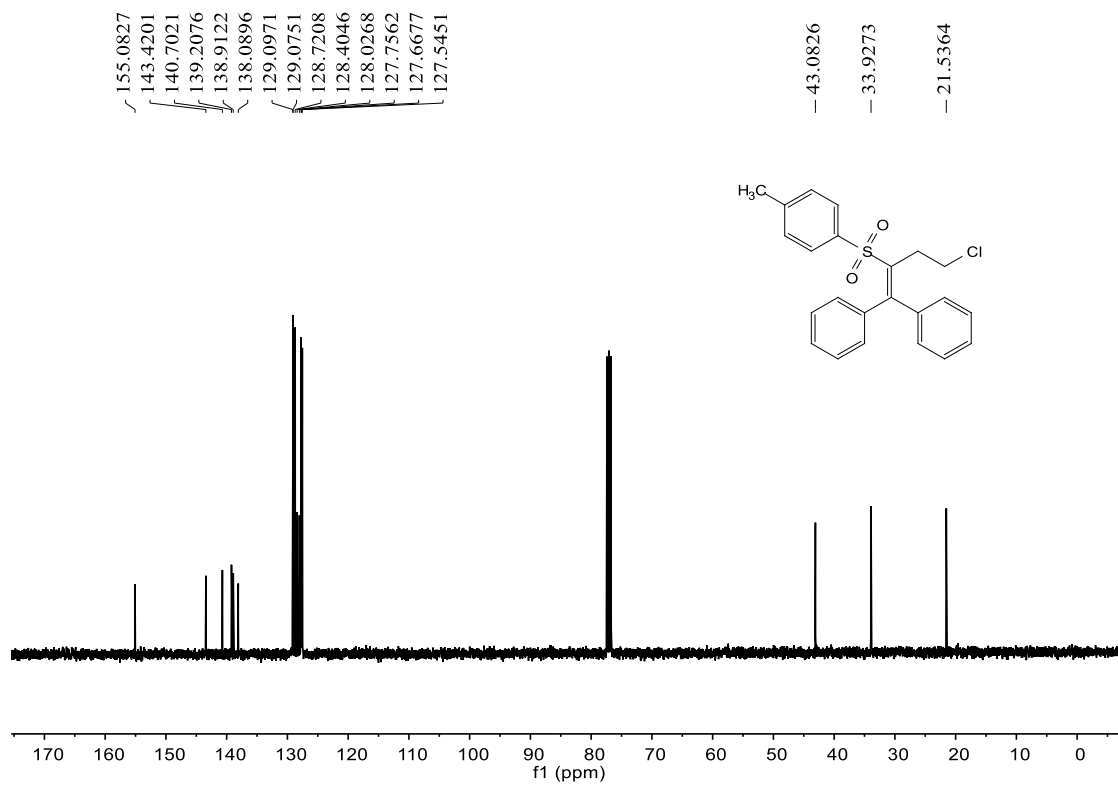

$^1\text{H}$  NMR and  $^{13}\text{C}$  NMR spectra of compound **7aa**

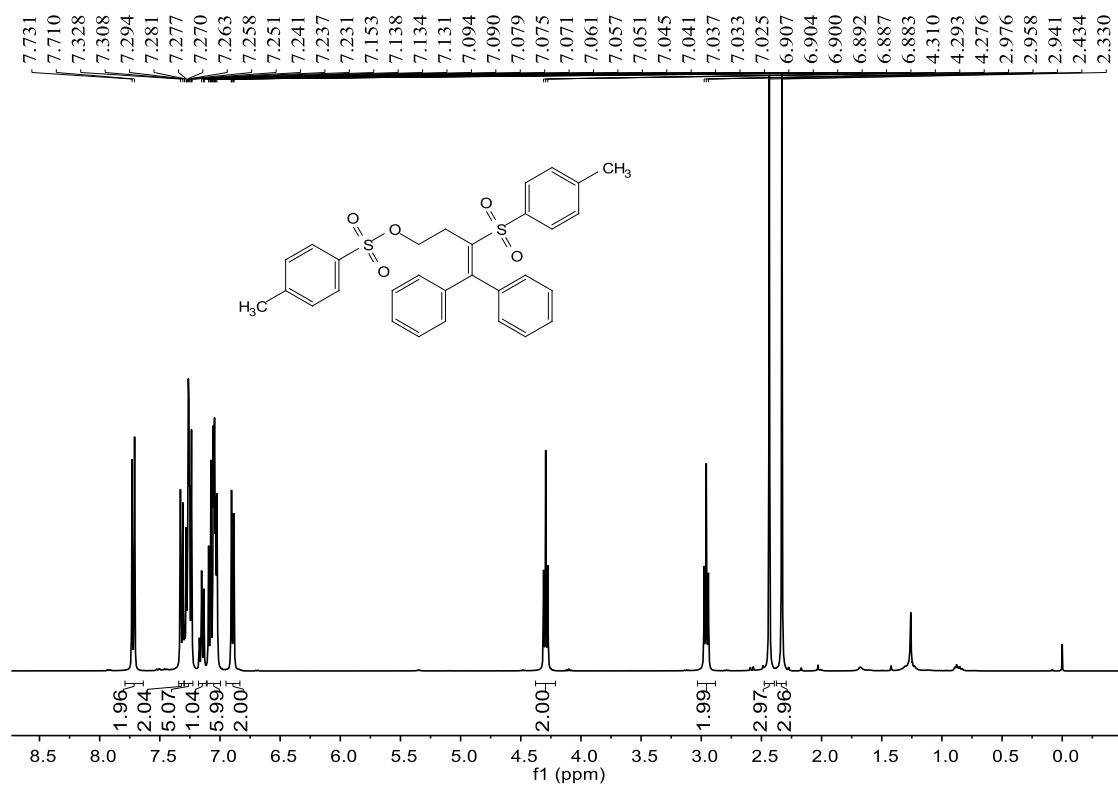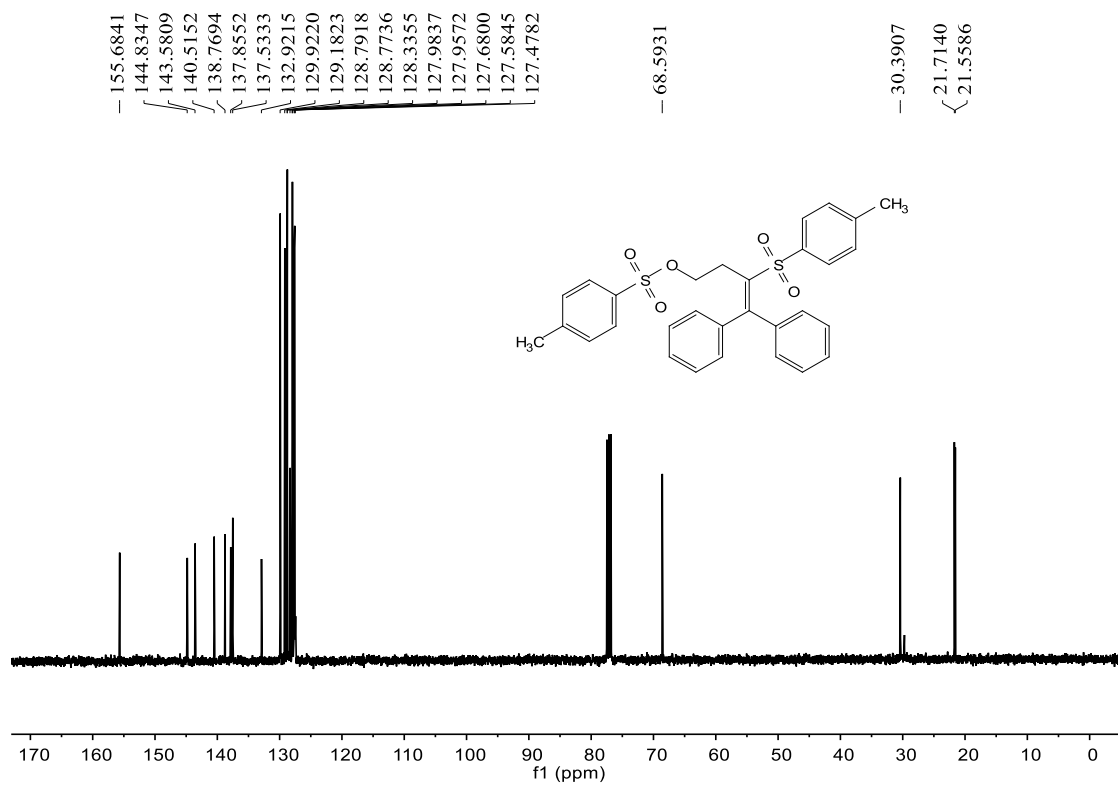

$^1\text{H}$  NMR and  $^{13}\text{C}$  NMR spectra of compound **8aa**

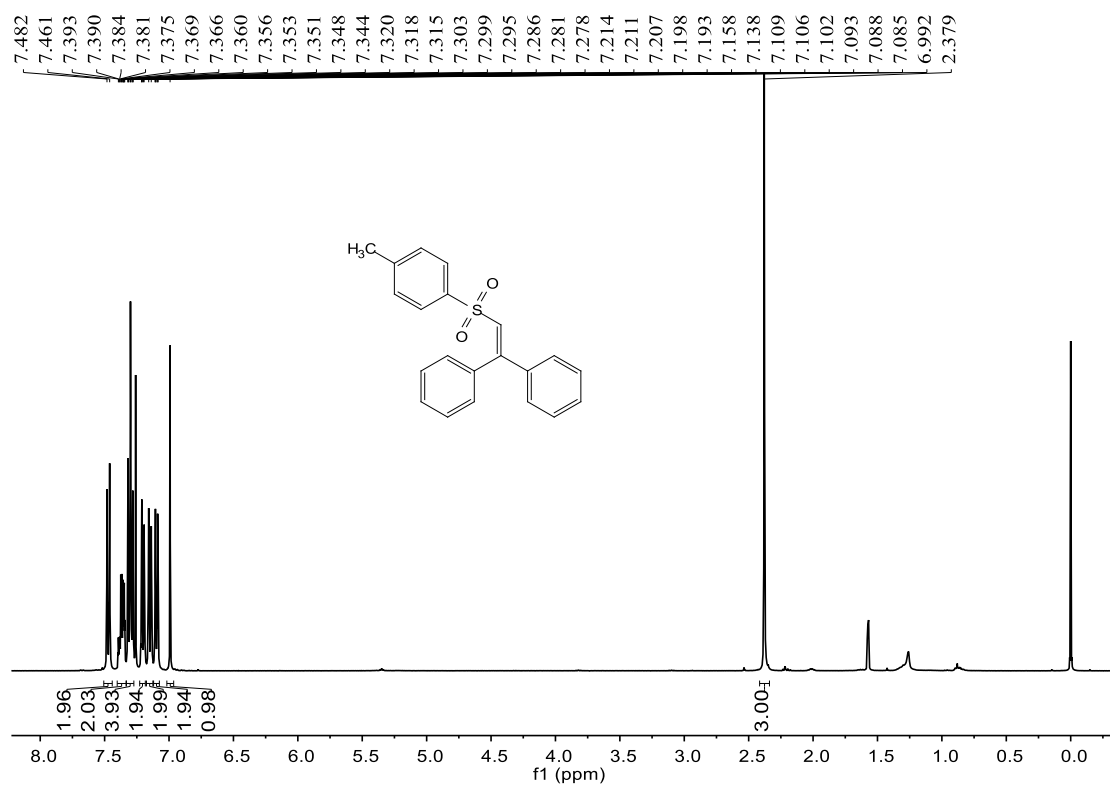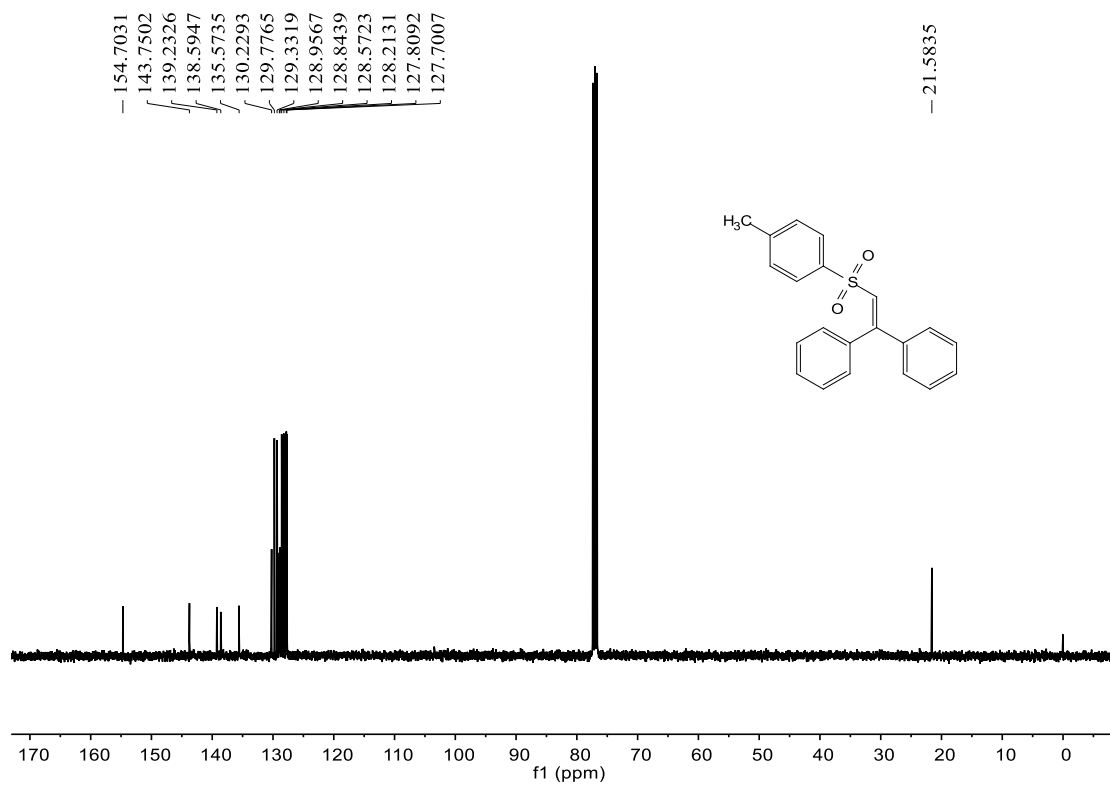

$^1\text{H}$  NMR and  $^{13}\text{C}$  NMR spectra of compound **9aa**

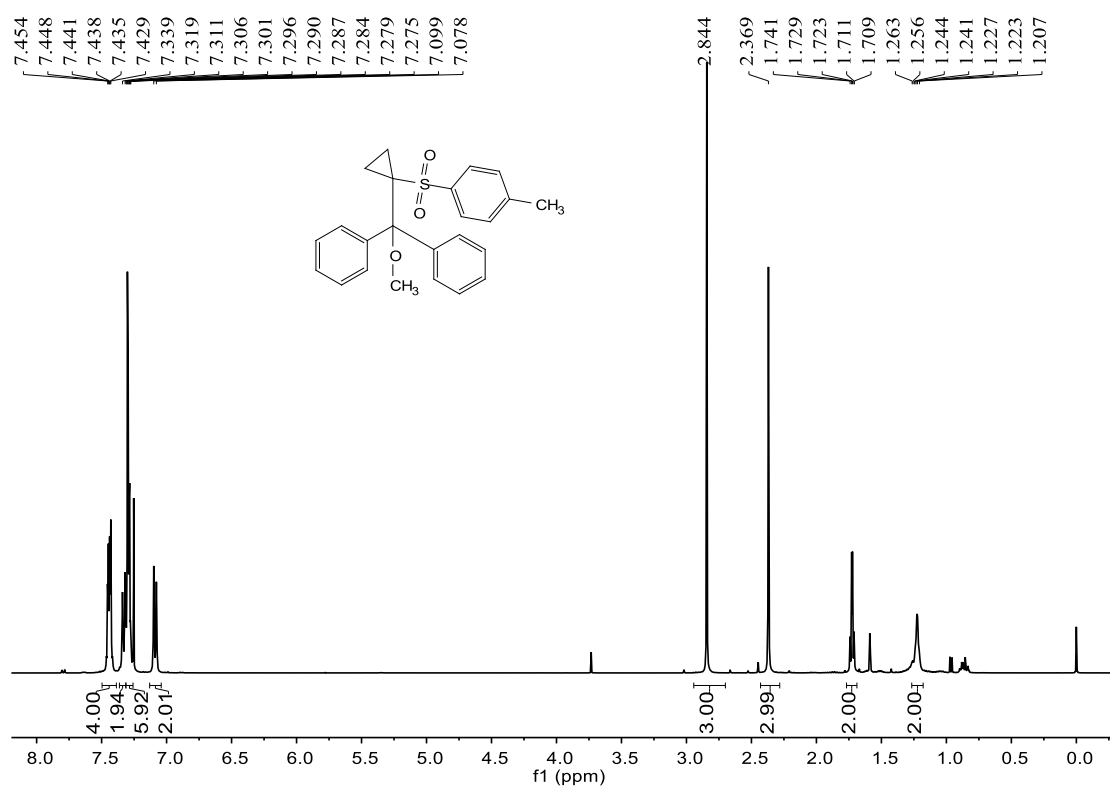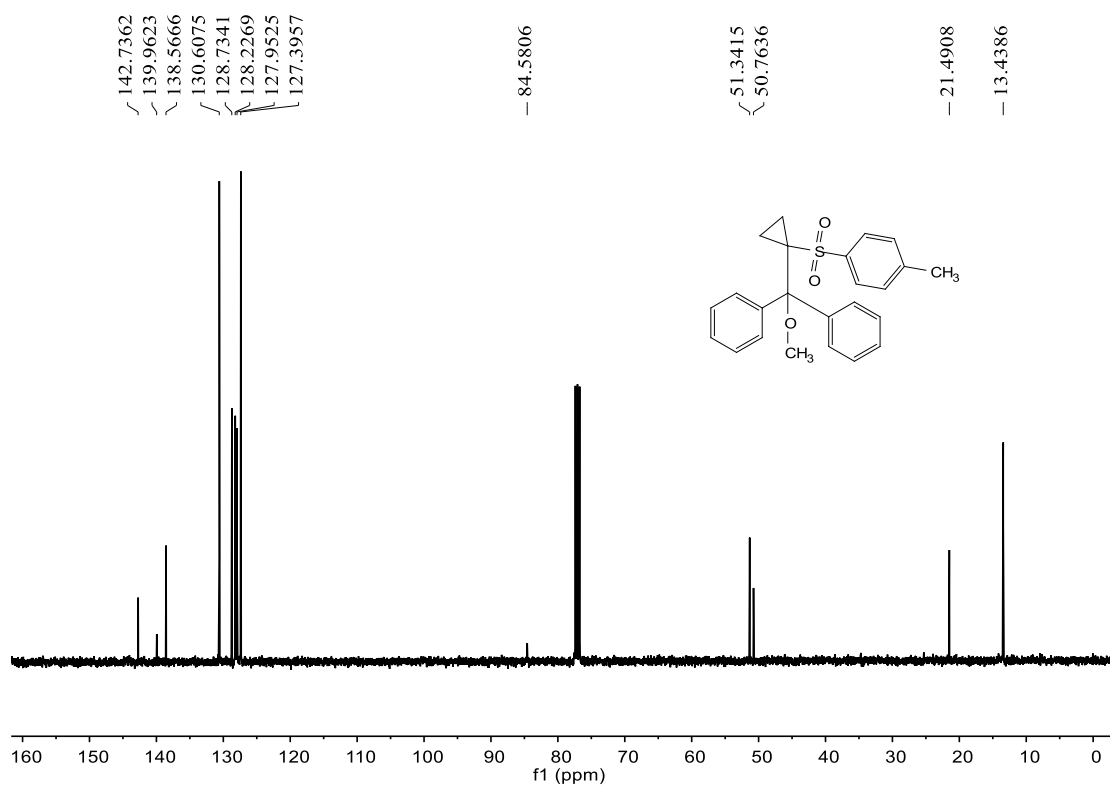

Supplement: c9qo01058k1.pdf [file c9qo01058k1.pdf]
